# Supplementary material for: Simulating soil salinity dynamics, cotton yield and evapotranspiration under drip irrigation by ensemble machine learning
Source: Front Plant Sci. 2023 Jun 7;14:1143462. doi: 10.3389/fpls.2023.1143462 (PMC10282761; doi:10.3389/fpls.2023.1143462)
Supplement: Table S1 — The original dataset collected in this study. [file Table_1.xlsx]

## Sheet: Trial details
Trial No.	Literatures	Site	Country
1	Zong, R., Han, Y., Tan, M., Zou, R., Wang, Z., 2022. Migration characteristics of soil salinity in saline-sodic cotton field with different reclamation time in non-irrigation season. Agricultural Water Management 263.	Shihezi, Xinjiang	China
2	Zheng, Z., Zhang, F., Ma, F., Chai, X., Zhu, Z., Shi, J., Zhang, S., 2009. Spatiotemporal changes in soil salinity in a drip-irrigated field. Geoderma 149(3-4), 243-248.	Maigaiti,Xinjiang	China
3	Zhao, X., Xu, H., Zhang, P., Bai, Y., Zhang, Q., 2015. Impact of Changing Irrigation Patterns on Saltwater Dynamics of Soil in Farmlands and their Shelterbelts in the Irrigated Zone of Kalamiji Oasis. Irrigation And Drainage 64(3), 393-399.	Kalamiji Oasis, Xinjiang	China
4	Zhao, L., Heng, T., Yang, L., Xu, X., Feng, Y., 2021. Study on the Farmland Improvement Effect of Drainage Measures under Film Mulch with Drip Irrigation in Saline-Alkali Land in Arid Areas. Sustainability 13(8).	Shawan, Xinjiang	China
5	Zhangzhong, L., Yang, P., Zheng, W., Wang, C., Zhang, C., Niu, M., 2018. Effects of Drip Irrigation Models on Chemical Clogging under Saline Water Use in Hetao District, China. Water 10(3).	Hetao, Inner Mongolia	China
6	Zhang, Z., Hu, H., Tian, F., Hu, H., Yao, X., Zhong, R., 2014. Soil salt distribution under mulched drip irrigation in an arid area of northwestern China. Journal Of Arid Environments 104, 23-33.	Bayangol, Xinjiang	China
7	Zhang, Y., Zhu, Y., Yao, B., 2020. A study on interannual change features of soil salinity of cotton field with drip irrigation under mulch in Southern Xinjiang. Plos One 15(12).	Tarim University, Xinjiang	China
8	Zhang, A., Zheng, C., Li, K., Dang, H., Cao, C., Rahma, A.E., Zhang, J., Feng, D., 2020. RESPONSES OF SOIL WATER-SALT VARIATION AND COTTON GROWTH TO DRIP IRRIGATION WITH SALINE WATER IN THE LOW PLAIN NEAR THE BOHAI SEA. Irrigation And Drainage 69(3), 448-459.	Hengshui, Bohai Plain	China
9	Zhang, A., Li, K., Sun, J., Dang, H., Sun, C., Rahma, A.E., Wang, G., Zhang, J., Feng, D., 2020. Effects of a 10-year irrigation with saline water on soil physico-chemical properties and cotton production. Journal Of Soil And Water Conservation 75(5), 629-639.	Hengshui, Bohai Plain	China
10	Yang, G., Li, F., Tian, L., He, X., Gao, Y., Wang, Z., Ren, F., 2020. Soil physicochemical properties and cotton (Gossypium hirsutum L.) yield under brackish water mulched drip irrigation. Soil & Tillage Research 199.	Shihezi, Xinjiang	China
11	Xing, X., Du, W., Ma, X., 2019. Field-scale distribution and heterogeneity of soil salinity in the mulched-drip-irrigation cotton field. Archives Of Agronomy And Soil Science 65(9), 1248-1261.	Shihezi, Xinjiang	China
12	Xiao, C., Li, M., Fan, J., Zhang, F., Li, Y., Cheng, H., Li, Y., Hou, X., Chen, J., 2021. Salt Leaching with Brackish Water during Growing Season Improves Cotton Growth and Productivity, Water Use Efficiency and Soil Sustainability in Southern Xinjiang. Water 13(18).	Yuli County, Korla, Xinjiang	China
13	Wu, H., Kang, S., Li, X., Guo, P., Hu, S., 2020. Optimization-Based Water-Salt Dynamic Threshold Analysis of Cotton Root Zone in Arid Areas. Water 12(9).	Akesu, Xinjiang	China
14	Wang, Z.-h., Zheng, X.-r., Lei, C.-x., Li, Z.-y., 2010. The research on the field soil salinity environment change with different drip irrigation years, International Conference of Environment Materials and Environment Management. Advanced Materials Research, Harbin, PEOPLES R CHINA, pp. 792-796.	XiaYeDi Irrigation Zone, Xinjiang	China
15	Wang, R., Wan, S., Sun, J., Xiao, H., 2018. Soil salinity, sodicity and cotton yield parameters under different drip irrigation regimes during saline wasteland reclamation. Agricultural Water Management 209, 20-31.	Karamay, Xinjiang	China
16	Wang, R., Wan, S., Kang, Y., Dou, C., 2014. Assessment of secondary soil salinity prevention and economic benefit under different drip line placement and irrigation regime in northwest China. Agricultural Water Management 131, 41-49.	Karamay Farm, Xinjiang	China
17	Wang, R., Kang, Y., Wan, S., Hu, W., Liu, S., Liu, S., 2011. Salt distribution and the growth of cotton under different drip irrigation regimes in a saline area. Agricultural Water Management 100(1), 58-69.	Karamay Farm, Xinjiang	China
18	Wang, R., Kang, Y., Wan, S., Hu, W., Liu, S., Jiang, S., Liu, S., 2012. Influence of different amounts of irrigation water on salt leaching and cotton growth under drip irrigation in an arid and saline area. Agricultural Water Management 110, 109-117.	Karamay Farm, Xinjiang	China
19	Wang, H., Feng, D., Zhang, A., Zheng, C., Li, K., Ning, S., Zhang, J., Sun, C., 2022. Effects of saline water mulched drip irrigation on cotton yield and soil quality in the North China Plain. Agricultural Water Management 262.	Henshui Station, North China Plain	China
20	Wang, D., Wang, Z., Lv, T., Zong, R., Zhu, Y., Zhang, J., Wang, T., 2021. Effects of drip tape modes on soil hydrothermal conditions and cotton yield (Gossypium hirsutum L.) under machine-harvest patterns. Peerj 9.	Shihezi, Xinjiang	China
21	Wang, C., Yang, G., Li, J., He, X., Xue, L., Long, A., 2017. Effects of timing and duration under brackish water mulch drip irrigation on cotton yield in northern Xinjiang, China. International Journal Of Agricultural And Biological Engineering 10(6), 115-122.	Shihezi, Xinjiang	China
22	Tan, S., Wang, Q., Xu, D., Zhang, J., Shan, Y., 2017. Evaluating effects of four controlling methods in bare strips on soil temperature, water, and salt accumulation under film-mulched drip irrigation. Field Crops Research 214, 350-358.	Bazhou, Tarim, Xinjiang	China
23	Shan, Y.Y., Wang, Q.J., Wang, C.X., Su, L.J., Dong, W.C., Zhang, J.H., Cao, L., 2021. DETERMINING OPTIMAL DRIP-IRRIGATION VOLUMES AFTER WETTING FOR MULCHED DRY-SEEDED COTTON (GOSSYPIUM HIRSUTUM L.) DURING THE SEEDLING STAGE USING HYDRUS-3D. Applied Ecology And Environmental Research 19(5), 3679-3702.	Korla, Xinjiang	China
24	Ren, F., Yang, G., Li, W., He, X., Gao, Y., Tian, L., Li, F., Wang, Z., Liu, S., 2021. Yield-compatible salinity level for growing cotton (Gossypium hirsutum L.) under mulched drip irrigation using saline water. Agricultural Water Management 250.	Shihezi, Xinjiang	China
25	Rajak, D., Manjunatha, M.V., Rajkumar, G.R., Hebbara, M., Minhas, P.S., 2006. Comparative effects of drip and furrow irrigation on the yield and water productivity of cotton (Gossypium hirsutum L.) in a saline and waterlogged vertisol. Agricultural Water Management 83(1-2), 30-36.	Gangavathi, Karnataka	India
26	Min, W., Hou, Z., Ma, L., Zhang, W., Ru, S., Ye, J., 2014. Effects of water salinity and N application rate on water- and N-use efficiency of cotton under drip irrigation. Journal Of Arid Land 6(4), 454-467.	Shihezi, Xinjiang	China
27	Min, W., Guo, H., Zhou, G., Zhang, W., Ma, L., Ye, J., Hou, Z., Wu, L., 2016. Soil salinity, leaching, and cotton growth as affected by saline water drip irrigation and N fertigation. Acta Agriculturae Scandinavica Section B-Soil And Plant Science 66(6), 489-501.	Shihezi, Xinjiang	China
28	Mai, W., Tian, C., Li, C., 2013. Soil Salinity Dynamics under Drip Irrigation and Mulch Film and Their Effects on Cotton Root Length. Communications In Soil Science And Plant Analysis 44(9), 1489-1502.	Korla, Xinjiang	China
29	Liu, Z., Jiao, X., Lu, S., Zhu, C., Zhai, Y., Guo, W., 2019. Effects of winter irrigation on soil salinity and jujube growth in arid regions. Plos One 14(6)	Qiemo, Bayingolin, Xinjiang	China
30	Liu, M.-x., Yang, J.-s., Li, X.-m., Yu, M., Wang, J., 2012. Effects of Irrigation Water Quality and Drip Tape Arrangement on Soil Salinity, Soil Moisture Distribution, and Cotton Yield (Gossypium hirsutum L.) Under Mulched Drip Irrigation in Xinjiang, China. Journal Of Integrative Agriculture 11(3), 502-511.	Junggar, Xinjiang	China
31	Liu, M., Yang, J., Li, X., Liu, G., Yu, M., Wang, J., 2013. Distribution and dynamics of soil water and salt under different drip irrigation regimes in northwest China. Irrigation Science 31(4), 675-688.	Wulanwusu, Xinjiang	China
32	Lin, X., Wang, Z., Li, J., 2022. Spatial variability of salt content caused by nonuniform distribution of irrigation and soil properties in drip irrigation subunits with different lateral layouts under arid environments. Agricultural Water Management 266.	Xinjiang	China
33	Lin, X., Wang, Z., Li, J., 2021. Identifying the factors dominating the spatial distribution of water and salt in soil and cotton yield under arid environments of drip irrigation with different lateral lengths. Agricultural Water Management 250.	Xinjiang	China
34	Li, X., Jin, M., Zhou, N., Jiang, S., Hu, Y., 2018. Inter-dripper variation of soil water and salt in a mulched drip irrigated cotton field: Advantages of 3-D modelling. Soil & Tillage Research 184, 186-194.	Peacock River, Xinjiang	China
35	Li, X., Jin, M., Zhou, N., Huang, J., Jiang, S., Telesphore, H., 2016. Evaluation of evapotranspiration and deep percolation under mulched drip irrigation in an oasis of Tarim basin, China. Journal Of Hydrology 538, 677-688.	Tarim River Basin, Xinjiang	China
36	Li, W., Wang, Z., Zhang, J., Zong, R., 2022. Soil salinity variations and cotton growth under long-term mulched drip irrigation in saline-alkali land of arid oasis. Irrigation Science 40(1), 103-113.	Paotai, Shihezi, Xinjiang	China
37	Li, W., Wang, Z., Zhang, J., Liu, N., 2021. Variations of Soil Salinity and Cotton Growth under Six-Years Mulched Drip Irrigation. Agronomy-Basel 11(6).	Paotai, Shihezi, Xinjiang	China
38	Li, M., Xiao, J., Bai, Y., Du, Y., Zhang, F., Cheng, H., Wang, H., 2020. Response Mechanism of Cotton Growth to Water and Nutrients under Drip Irrigation with Plastic Mulch in Southern Xinjiang. Journal Of Sensors 2020.	Korla, Xinjiang	China
39	Leilei, G., Zaimin, W., 2022. Interaction Between Brackish Water Intermittent Infiltration and Cultivated Soil Environment: A Case Study From Arid Piedmont Plain of Northwest China. Frontiers In Earth Science 10.	Tarim, Xinjiang	China
40	Kang, Y., Wang, R., Wan, S., Hu, W., Jiang, S., Liu, S., 2012. Effects of different water levels on cotton growth and water use through drip irrigation in an arid region with saline ground water of Northwest China. Agricultural Water Management 109, 117-126.	Karamay Farm, Xinjiang	China
41	Hu, S., Shen, Y., Chen, X., Gan, Y., Wang, X., 2013. Effects of saline water drip irrigation on soil salinity and cotton growth in an Oasis Field. Ecohydrology 6(6), 1021-1030.	Akesu, Xinjiang	China
42	Hou, X., Xiang, Y., Fan, J., Zhang, F., Hu, W., Yan, F., Xiao, C., Li, Y., Cheng, H., Li, Z., 2022. Spatial distribution and variability of soil salinity in film-mulched cotton fields under various drip irrigation regimes in southern Xinjiang of China. Soil & Tillage Research 223.	Korla, Xinjiang	China
43	He, P., Yu, S.e., Zhang, F., Ma, T., Ding, J., Chen, K., Chen, X., Dai, Y., 2022. Effects of Soil Water Regulation on the Cotton Yield, Fiber Quality and Soil Salt Accumulation under Mulched Drip Irrigation in Southern Xinjiang, China. Agronomy-Basel 12(5).	Korla, Xinjiang	China
44	Han, S., Yang, Y., Li, H., Yang, Y., Wang, J., Cao, J., 2019. Determination of crop water use and coefficient in drip-irrigated cotton fields in arid regions. Field Crops Research 236, 85-95.	Akesu, Xinjiang	China
45	Guan, Z., Jia, Z., Zhao, Z., You, Q., 2019. Dynamics and Distribution of Soil Salinity under Long-Term Mulched Drip Irrigation in an Arid Area of Northwestern China. Water 11(6).	Shihezi, Xinjiang	China
46	Guan, H.-j., Li, J.-s., Li, Y.-f., 2013. Effects of Drip System Uniformity and Irrigation Amount on Water and Salt Distributions in Soil Under Arid Conditions. Journal Of Integrative Agriculture 12(5), 924-939.	Urumqi, Xinjiang	China
47	Feng, J., Liu, H., Wang, G., Tian, R., Cao, M., Bai, Z., He, T., 2021. Effect of Periodic Winter Irrigation on Salt Distribution Characteristics and Cotton Yield in Drip Irrigation under Plastic Film in Xinjiang. Water 13(18).	Manas County, Xinjiang	China
48	Feng, D., Zhang, J., Cao, C., Sun, J., Shao, L., Li, F., Dang, H., Sun, C., 2015. Soil Salt Accumulation and Crop Yield under Long-Term Irrigation with Saline Water. Journal Of Irrigation And Drainage Engineering 141(12).	Henshui, Hebei	China
49	Danierhan, S., Shalamu, A., Tumaerbai, H., Guan, D., 2013. Effects of emitter discharge rates on soil salinity distribution and cotton (Gossypium hirsutum L.) yield under drip irrigation with plastic mulch in an arid region of Northwest China. Journal Of Arid Land 5(1), 51-59.	Aksu, Xinjiang	China
50	Cheng, M., Wang, H., Fan, J., Wang, X., Sun, X., Yang, L., Zhang, S., Xiang, Y., Zhang, F., 2021. Crop yield and water productivity under salty water irrigation: A global meta-analysis. Agricultural Water Management 256.	-	Global
51	Chen, W., Jin, M., Ferre, T.P.A., Liu, Y., Xian, Y., Shan, T., Ping, X., 2018. Spatial distribution of soil moisture, soil salinity, and root density beneath a cotton field under mulched drip irrigation with brackish and fresh water. Field Crops Research 215, 207-221.	Peacock River, Tarim Basin, Xinjiang	China
52	Chen, W., Jin, M., Ferre, T.P.A., Liu, Y., Huang, J., Xian, Y., 2020. Soil conditions affect cotton root distribution and cotton yield under mulched drip irrigation. Field Crops Research 249.	Tarim Basin, Xinjiang	China
53	Chen, J., Wang, Z., Zhang, J., Cao, W., 2020a. Effects of Different Salt Stress on Physiological Growth and Yield of Drip Irrigation Cotton (Gossypium hirsutum L.). Intelligent Automation And Soft Computing 26(5), 949-959.	Key Laboratory of Modern Water-Saving Irrigation Production and Construction Corps, Xinjiang	China
54	Che, Z., Wang, J., Li, J., 2022. Determination of threshold soil salinity with consideration of salinity stress alleviation by applying nitrogen in the arid region. Irrigation Science 40(2), 283-296.	Xinjiang	China
55	Che, Z., Wang, J., Li, J., 2021. Effects of water quality, irrigation amount and nitrogen applied on soil salinity and cotton production under mulched drip irrigation in arid Northwest China. Agricultural Water Management 247.	Xinjiang	China
56	Unlu, M., Kanber, R., Koc, D.L., Tekin, S., Kapur, B., 2011. Effects of deficit irrigation on the yield and yield components of drip irrigated cotton in a mediterranean environment. Agricultural Water Management 98(4), 597-605.	Cukurova University, Adana	Turkey
57	Unlu, M., Kanber, R., Kapur, B., Tekin, S., Koc, D.L., 2011. The crop water stress index (CWSI) for drip irrigated cotton in a semi-arid region of Turkey. African Journal Of Biotechnology 10(12), 2258-2273.	Cukurova University, Adana	Turkey
58	Tari, A.F., Coskun, Z., Odabasioglu, C., Akin, S., 2021. EFFECTS OF VARIOUS WATER LEVELS AND LATERAL SPACING ON THE YIELD AND QUALITY OF DRIP-IRRIGATED COTTON (GOSSYPIUM HIRSUTUM .L.) UNDER ARID CONDITIONS. Applied Ecology And Environmental Research 19(5), 4037-4053.	Harran University, Sanliurfa	Turkey
59	Sugita, M., Matsuno, A., El-Kilani, R.M.M., Abdel-Fattah, A., Mahmoud, M.A., 2017. Crop evapotranspiration in the Nile Delta under different irrigation methods. Hydrological Sciences Journal-Journal Des Sciences Hydrologiques 62(10), 1618-1635.	Zagazig & Sakha	Egypt
60	Singh, Y., Rao, S.S., Regar, P.L., 2010. Deficit irrigation and nitrogen effects on seed cotton yield, water productivity and yield response factor in shallow soils of semi-arid environment. Agricultural Water Management 97(7), 965-970.	Pali-Marwar	India
61	Singh, K., Rathore, P., Brar, A.S., Mishra, S.K., 2021. Drip fertigation improves seed cotton yield, water productivity and profitability of cotton raised under high density planting system in semi-arid environment. Emirates Journal Of Food And Agriculture 33(9), 781-793.	Faridkot	India
62	Singh, K., Brar, A.S., Singh, H.P., 2018. Drip fertigation improves water and nitrogen use efficiency of Bt cotton. Journal Of Soil And Water Conservation 73(5), 549-557.	Faridkot	India
63	Sajid, I., Tischbein, B., Borgemeister, C., Floerke, M., 2022. Performance Evaluation and Water Availability of Canal Irrigation Scheme in Punjab Pakistan. Water 14(3).	Punjab	Pakistan
64	Ramamurthy, V., Patil, N.G., Venugopalan, M.V., Challa, O., 2009. Effect of drip irrigation on productivity and water-use efficiency of hybrid cotton (Gossypium hirsutum) in Typic Haplusterts. Indian Journal Of Agricultural Sciences 79(2), 118-121.	Panubali,	Indonesia
65	Rajak, D., Manjunatha, M.V., Rajkumar, G.R., Hebbara, M., Minhas, P.S., 2006. Comparative effects of drip and furrow irrigation on the yield and water productivity of cotton (Gossypium hirsutum L.) in a saline and waterlogged vertisol. Agricultural Water Management 83(1-2), 30-36.	Gangavathi, Karnataka	India
66	Oweis, T.Y., Farahani, H.J., Hachum, A.Y., 2011. Evapotranspiration and water use of full and deficit irrigated cotton in the Mediterranean environment in northern Syria. Agricultural Water Management 98(8), 1239-1248.	Tel Hadya research station	Syria
67	Onder, D., Akiscan, Y., Onder, S., Mert, M., 2009. Effect of different irrigation water level on cotton yield and yield components. African Journal Of Biotechnology 8(8), 1536-1544.	Amik Plain of Hatay	Turkey
68	Mitchell-McCallister, D., Cano, A., West, C., 2020. Meta-analysis of crop water use efficiency by irrigation system in the Texas High Plains. Irrigation Science 38(5-6), 535-546.	-	Global
69	Mandal, U.K., Warrington, D.N., Bhardwaj, A.K., Bar-Tal, A., Kautsky, L., Minz, D., Levy, G.J., 2008. Evaluating impact of irrigation water quality on a calcareous clay soil using principal component analysis. Geoderma 144(1-2), 189-197.	Bet She'an Valley	Israel
70	Karam, F., Lahoud, R., Masaad, R., Daccache, A., Mounzer, O., Rouphael, Y., 2006. Water use and lint yield response of drip irrigated cotton to the length of irrigation season. Agricultural Water Management 85(3), 287-295.	Bekaa Valley	Lebanon
71	Kalfountzos, D., Alexiou, I., Kotsopoulos, S., Zavakos, G., Vyrlas, P., 2007. Effect of subsurface drip irrigation on cotton plantations. Water Resources Management 21(8), 1341-1351.	Larissa	Greece
72	Hussein, F., Janat, M., Yakoub, A., 2011. Assessment of yield and water use efficiency of drip-irrigated cotton (Gossypium hirsutum L.) as affected by deficit irrigation. Turkish Journal Of Agriculture And Forestry 35(6), 611-621.	Damascus	Syria
73	Hunsaker, D.J., Bronson, K.F., 2021. FAO56 crop and water stress coefficients for cotton using subsurface drip irrigation in an arid US climate. Agricultural Water Management 252.	Maricopa, Arizon	USA
74	Himanshu, S.K., Ale, S., Bordovsky, J.P., Kim, J., Samanta, S., Omani, N., Barnes, E.M., 2021. Assessing the impacts of irrigation termination periods on cotton productivity under strategic deficit irrigation regimes. Scientific Reports 11(1).	Texas A&M AgriLife Research Center at Halfway	USA
75	DeLaune, P.B., Sij, J.W., Park, S.C., Krutz, L.J., 2012. Cotton Production as Affected by Irrigation Level and Transitioning Tillage Systems. Agronomy Journal 104(4), 991-995.	Texas A&M AgriLife Research Station	USA
76	Bhattarai, S.P., Midmore, D.J., 2009. Oxygation Enhances Growth, Gas Exchange and Salt Tolerance of Vegetable Soybean and Cotton in a Saline Vertisol. Journal Of Integrative Plant Biology 51(7), 675-688.	Rockhampton	Australia
77	Bhattarai, S.P., McHugh, A.D., Lotz, G., Midmore, D.J., 2006. The response of cotton to subsurface drip and furrow irrigation in a vertisol. Experimental Agriculture 42(1), 29-49.	Queensland,	Australia
78	Ayars, J.E., Schoneman, R.A., Dale, F., Meso, B., Shouse, P., 2001. Managing subsurface drip irrigation in the presence of shallow ground water. Agricultural Water Management 47(3), 243-264.	Mendota, CA	USA
79	Attia, A., Rajan, N., Ritchie, G., Cui, S., Ibrahim, A., Hays, D., Xue, Q., Wilborn, J., 2015. Yield, Quality, and Spectral Reflectance Responses of Cotton under Subsurface Drip Irrigation. Agronomy Journal 107(4), 1355-1364.	Chillicothe, TX	USA
80	Sun, Z., Dong, X., Wang, X., Zheng, D., Dong, L., Liu, Z., 2014. Effect of saline drip irrigation to soil water and salt distribution and cotton yield in Northern Shandong Plain. Agricultural Research in the Arid Areas 32(5), 12-17,24.	Huimin, Shandong	China
81	Su, L., Abudu, S., Song, Y., 2011. Effects of Drip Irrigation Volume on Soil Water-salt Transfer and Its Redistribution. Arid Zone Research 28(1), 79-84.	Aksu, Xinjiang	China
82	Jin, J., Shenghong;, R., Liu, T., 2016. Impact of Irrigation Methods on Soil Salt Content and Their Differences in Whole Cotton Growing Season in Arid Area of Northwest China. Journal of Resources and Ecology 7(6), 453-463.	Shihezi, Xinjiang	China
83	Zhu, J., Wang, L., Wang, B., Yang, T., Chen, B., Liu, H., Xu, Y., Ma, X., 2010. Effects of Regulation and Control of Water and N Fertilizer on Soil Salt Content in Cotton Field under Mulch-film Drip Irrigation. Xinjiang Agricultural Sciences 47(10), 1963-1969.	Korla, Xinjiang	China
84	Sun, Z., Zhang, W., L.i, L., Chang, S., Zhang, X., Yang, Z., 2009. Research of Salt Transfer for the Covered Cotton under Drip Irrigation with Plastic Film Mulch in Xinjiang. Xinjiang Agricultural Sciences 46(1), 133-137.	Wujiaqu, Xinjiang	China
85	Hou, Z., L.i, P., Gong, J., Ru, S., Wang, Y., 2007. Effect of Different Soil Salinity Levels and Application Rates of Nitrogen on the Growth of Cotton under Drip Irrigation. Journal of Soil Science 38(4), 681-686.	Shihezi, Xinjiang	China
86	Zhao, Y., Hu, D.T., Ma, H.A., Zhu, D., Li, H., Zhu, H., 2015. Study on the variation characteristics of soil salt in cotton field during the year and interannual by perennial drip irrigation under plastic film in Northern Xinjiang. Agricultural Research in the Arid Areas 33(5), 130-134,162.	Paotai, Xinjiang	China
87	Zhao, B., Wang, Z., Li, W., 2016. Effects of winter drip irrigation mode and quota on water and salt distribution in cotton field soil and cotton growth next year in northern Xinjiang. Transactions of the Chinese Society of Agricultural Engineering 32(6), 139-148.	Shihezi, Xinjiang	China
88	Zhang, Y., Zhang, F., Fan, J., Hou, X., Wang, H., Liu, X., He, P., Xue, Z., 2020. Effects of drip irrigation technical parameters on cotton growth, soil moisture and salinity in Southern Xinjiang. Transactions of the Chinese Society of Agricultural Engineering 36(24), 107-117.	Korla, Xinjiang	China
89	Zhang, W., Xin, L.U., Li, L., Liu, J., Sun, Z., Zhang, X., Yang, Z., 2008. Salt transfer law for cotton field with drip irrigation under the plastic mulch in Xinjiang Region. Transactions of the Chinese Society of Agricultural Engineering 24(8), 15-19.	Paotai, Xinjiang	China
90	Zhang, Q., Aikebaier, Y., Zhao, J., Zhang, W., 2018. Effect of Integration of Water,Fertilizer and Soil Amendment on Cotton Yield Improvement and Soil Salt Control. Xinjiang Agricultural Sciences 55(3), 420-429.	Shawan, Xinjiang	China
91	Zhang, J., Hudan·Tumarebi, Wang, Z., Wang, Y., Yi, P., Wu, Z., 2012. Effect of Different Depth Straw Mulching on Soilwater Movement and Salt Transport under Saline-alkali Drip Irrigation for the Cotton. Journal of Irrigation and Drainage 31(3), 37-41.	Shihezi, Xinjiang	China
92	Zhang, A., Zheng, C., Li, Z., Li, K., Cao, C., Li, Q., Zhang, J., 2018a. Responsive Growth of Seedling and Matured Cotton to Drip Irrigation with SalineWater. Journal of Irrigation and Drainage 37(10), 16-22.	Shenzhou, Hebei	China
93	Li, Y., Pang, H., Chen, F., Zhang, F., 2009. Effect of Drip Irrigation under Plastic Mulch on Aeolian Sandy Soil Salt Dynamic and Cotton Yield. Journal of Soil and Water Conservation 23(4), 96-100.	Paotai, Xinjiang	China
94	Yao, B., Li, G., Ye, H., Li, F., 2016. Characteristics of Spatial and Temporal Changes in Soil Salt Content in Cotton Fields under Mulched Drip Irrigation in Arid Oasis Regions. Transactions of the Chinese Society for Agricultural Machinery 47(1), 151-161.	Tarim University, Xinjiang	China
95	Yang, P., Dong, X., Liu, L., Yang, X., Zhang, Y., 2011. Soil salt movement and regulation of drip irrigation under plastic film in arid area. Transactions of the Chinese Society of Agricultural Engineering 27(12), 90-95.	Korla, Xinjiang	China
96	Yang, C., Luo, Y., Sun, L., Gan, R., Wu, N., Zhang, Y., Abuduwaili ·, J., 2012. Experimental Study on the Impacts of the Irrigation Water Salinity on Cotton Growth in Manas River Oasis, Xinjiang. Resources Science 34(4), 660-667.	Shihezi, Xinjiang	China
97	Yang, G., Li, W., Ren, F., He, X., Wang, C., Qiao, C., Li, X., Lei, J., Li, F., 2021. Soil salinity accumulation and model simulation of cotton under mulch drip irrigation with different salinity level water. Transactions of the Chinese Society of Agricultural Engineering 37(19), 73-83.	Shihezi, Xinjiang	China
98	Xie, H., Gong, J., He, S., 2013. Influence of Irrigation Amount of Mulched Drip Irrigation on Type of Soil Salt. Journal of Henan Agricultral Sciences 42(8), 45-47.	Shihezi, Xinjiang	China
99	Li, X., Yang, J., Liu, M., Yu, S., 2011. Study on Soil Salt Distribution with Drip Irrigation Under Mulch in Cotton Boll Period in South Xinjiang. Soils 43(2), 289-292.	Xinir, Bayingolin Mongolia Autonomous Prefecture, Xinjiang	China
100	Wu, F., Lin, T., Wang, J., Wang, L., Yan, C., Zumilaiti, T., Deng, F., Er, C., Tang, Q., 2018. Effect of Drip Irrigation under Film on Soil Water and Salt Movement in a Residual Film Cotton Field. Cotton Science 30(5), 395-405.	Awati, Xinjiang	China
101	Wang, Z., Yang, P., Zheng, X., He, X., Zhang, J., Li, W., 2014. Soil Salt Dynamics in Cotton Fields with Mulched Drip Irrigation under the Existing Irrigation System in Xinjiang. Transactions of the Chinese Society for Agricultural Machinery 45(8), 149-159.	Paotai, Xinjiang	China
102	Wang, Z., Yang, P., Zheng, X., He, X., Zhang, J., Li, W., 2014. Soil salinity changes of root zone and arable in cotton field with drip irrigation under mulch for different years. Transactions of the Chinese Society of Agricultural Engineering 30(4), 90-99.	Paotai, Xinjiang	China
103	Wang, Z., Lv, D., Wen, X., Kong, F., Hu, T., Liu, W., 2005. Research on Regulation of Soil Water-salt Transport under Subsurface Drip Irrigation in Cotton Field in Xinjiang. Journal of Irrigation and Drainage 24(5), 22-24,28.	Bole, Xinjiang	China
104	Wang, R., Kang, Y., Wan, S., Sun, J., 2014. Effects of water regulation methods on soil salt, nutrient content and its distribution in overlying saline wasteland. Transactions of the Chinese Society of Agricultural Engineering 30(14), 96-104.	Karamay City	China
105	Wang, M., Lv, T., He, X., Cao, Y., Wang, D., 2018. Effects of drip-irrigated planting modes on soil water, temperature,salt and cotton growth. Agricultural Research in the Arid Areas 36(5), 176-186.	Shihezi, Xinjiang	China
106	Wang, H., Wang, K., Liuyuguo, Hou, Z., Lu, X., 2010. Effects on cotton growth and salinity changes in different soil depth of drip irrigation in cotton field. Ecology and Environmental Sciences 19(10), 2381-2385.	Manas County, Xinjiang	China
107	Wang, F., Sun, J., Liu, Z., Ning, H., Qiang, X., Shen, X., 2013. Effect of Different Irrigation Scheduling on Salt Distribution and Leaching in Cotton Field. Transactions of the Chinese Society for Agricultural Machinery 44(12), 120-127.	Akesu, Xinjiang	China
108	Sun, C., Zhang, J., Feng, D., Liu, H., Sun, J., Shen, X., Liu, Y., Ping, W., 2015. Dynamics of Soil Water,Salt and Cotton Growth in Coastal Saline-alkali Land. Journal of Irrigation and Drainage 34(1), 79-84.	Dongguang, Hebei	China
109	Ran, S., Chen, W., Liu, T., 2015. Impact of Irrigation Methods on Soil Salt Content in Cotton Growing Season of Irrigation Area in Midstream of Manas River. Journal of Irrigation and Drainage 34(11), 11-17.	Shihezi, Xinjiang	China
110	Mu, H., Hudan·Tumaerbai, Su, L., Mahemujiang·Aihemaiti, Wang, Y., Zhang, J., 2011. Salt transfer law for cotton field with drip irrigation under mulchin arid region. Transactions of the Chinese Society of Agricultural Engineering 27(7), 18-22.	Shihezi, Xinjiang	China
111	Ming, G., Tian, F., Hu, H., 2018. Effect of water table depth on soil water and salt dynamics and soil salt accumulation characteristics under mulched drip irrigation. Transactions of the Chinese Society of Agricultural Engineering 34(5), 90-97.	Korla, Xinjiang	China
112	Yu, M., Yang, J., Liu, M., Li, X., Jin, W., 2011. Laboratory experiment on effects of different mulched drip irrigation conditions on cotton evapotranspiration. Journal of Northwest A & F University. Natural Science Edition 39(6), 75-81.	Usu, Xinjiang	China
113	Ma, K., Wang, Z., Wang, T., Zong, R., 2021. Interactive effects of nitrogen and salt on yield and quality of cotton in condition of under film drip irrigation. Journal of Arid Land Resources and Environment 35(11), 165-171.	Shihezi, Xinjiang	China
114	Ma, J., Zhou, J., He, S., Zheng, G., Su, Q., 2013. Influence of Irrigation Frequency of Drip Irrigation under Mulch on Soil Water-Salt Transport of Salinization Soil. Journal of Irrigation and Drainage 32(4), 44-47.	Akesu, Xinjiang	China
115	Li, W., Wang, Z., Zheng, X., Zhang, J., 2015. The effect of drip irrigation under film in long - term on the soil salinity in root zone and the cotton growth. Journal of Arid Land Resources and Environment 29(8), 161-166.	Akesu, Xinjiang	China
116	Jiang, Z., Zhang, J., Bai, Y., Liu, H., Xiao, J., Pan, X., Jiang, L., 2022. The Impact of Mulched Drip Fertigation with Saline Water on Uptake of Ions and Nutrients by Cotton. Journal of Irrigation and Drainage 41(2), 59-67	Korla, Xinjiang	China
117	Hudan Tumarbay, Zhao, Y., Mahemujiang?Aihemaiti, Zhu, D., Li, H., 2016. Study on Characteristics of Cotton Field Soil Salt Accumulation under Perennial Mulched Drip Irrigation in Northern Xinjiang. Journal of Irrigation and Drainage 35(1), 1-5.	Shihezi, Xinjiang	China
118	Hudan, T., Zhao, Y., Mahemujiang, A., 2016. Study on spatial and temporal variabilities of soil moisture and salt during freeze-thawing period in cotton field with drip irrigation. Agricultural Research in the Arid Areas 34(5), 269-274.	Shihezi, Xinjiang	China
119	Huang, Z., Liu, G., Li, J., Chen, J., Feng, W., Tian, S., Wang, Y., 2020. Effect of Layout of Drip Irrigation Belt and Irrigation Quota on Soil Properties and Cotton Yield. Chinese Journal of Soil Science 51(2), 325-331.	Shawan, Xinjiang	China
120	Hu, H., Zhang, Z., Tian, F., Yang, P., Ni, G., Yao, X., 2016. Response of soil salinity and crop growth to irrigation methods in Xinjiang. Journal of Tsinghua University. Science and Technology 56(4), 373-380.	Korla, Xinjiang	China
121	He, Z., Shi, W., Yang, J., 2017. Water and salt transport and desalination effect of halophytes intercropped cotton field with drip irrigation under film. Transactions of the Chinese Society of Agricultural Engineering 33(23), 129-138.	Bayingolin Mongolia Autonomous Prefecture, Xinjiang	China
122	He, P., Zhang, F., Hou, X., Liu, L., Meng, X., Zhang, C., Cheng, H., 2020. Effects of Soil Water Regulation on Cotton Yield and Soil Water-Salt Distribution Under Drip Irrigation in Southern Xinjiang. Research of Soil and Water Conservation 27(2), 84-92.	Korla, Xinjiang	China
123	He, P., Zhang, F., Fan, J., Hou, X., Liu, X., Zhang, Y., Xue, Z., 2020. Effects of soil moisture regulation on growth,quality and water use of cotton under drip irrigation in Southern Xinjiang. Agricultural Research in the Arid Areas 38(4), 39-46.	Korla, Xinjiang	China
124	Wang, H., Cui, J., Wang, K., Shi, L., Jiao, S., Lin, H., Lv, X., 2010a. Soil Water-salt Dynamic Change for Cotton Field under Mulched Drip Irrigation on Oasis in Xinjiang. Journal of Irrigation and Drainage 29(1), 136-138.	Shawan, Xinjiang	China
125	Guo, R., Lin, T., Xu, H., Cui, J., Ma, J., Liu, Z., Tian, L., 2017. Effect of Saline Water Drip Irrigation on Water and Salt Transport Features and Cotton Yield of Oasis Cotton Field. Journal of Soil and Water Conservation 31(1), 211-216.	Awati, Xinjiang	China
126	Gong, J., Zhao, Z., Xie, H., Hou, Z., Tao, R., Li, Y., 2014. Water and Salt Transport of Cotton Field under Film Drip Irrigation. Journal of Irrigation and Drainage 33(2), 73-76.	Shihezi, Xinjiang	China
127	Gong, J., Zhao, Z., Xie, H., Hou, Z., Dang, F., 2014. Temporal and Spatial Variation of Soil Salt Content in Cotton Field with Long-term Drip Irrigation under Film. Journal of Irrigation and Drainage 33(4/5), 237-239.	Shihezi, Xinjiang	China
128	Cui, J., Wang, Z., Jing, R., Li, Y., Liu, X., Wang, H., 2013. Dynamic changes of soil water and salt in cotton field under mulched drip irrigation condition. Agricultural Research in the Arid Areas 31(4), 50-53.	Manas County, Xinjiang	China
129	Cui, J., Cheng, Q., Chen, P., Guo, R., Wang, L., Zheng, Z., Lin, T., Tian, L., Xu, H., 2019. Effects of Drip Irrigation Frequency on Soil Physical and Chemical Characteristics and Cotton Yield Under Subsoiling Condition. Journal of Soil and Water Conservation 33(1), 263-269,276.	Awati, Xinjiang	China
130	Zhao, C., Yan, Y., Li, J., Sheng, Y., Yilihamu, Y., 2009. Distributed characteristics of soil water-salt of cotton field under drip irrigation under mulching in Tarim Irrigated Area. Arid Land Geography 32(6), 892-898.	Akesu, Xinjiang	China
131	Cheng, S., Lin, T., Wu, F., Hou, P., Tang, Q., 2021. Effects of planting density and irrigation quota on soil salinity in machine-harvested cotton field. Chinese Journal of Ecology 40(12), 3933-3943.	Awati, Xinjiang	China
132	Cheng, H.L., Zhang, F.C., Li, M., Zheng, W.H., Xiao, C., Li, Y.-P., 2021a. Effects of soil matrix potential regulation at various growth states on cotton growth and soil water and salt distribution. Ying yong sheng tai xue bao = The journal of applied ecology 32(1), 211-221.	Weili, Korla, Xinjiang	China
133	Chen, X., Hu, S., Li, X., 2010. Effects of irrigation with saline water on soil water-salt transport features and cotton yield. Agricultural Research in the Arid Areas 28(3), 7-12.	Akesu, Xinjiang	China
134	Cai, F., Li, G., Zhang, Q., Cheng, H., Li, F., Li, J., Ji, F., 2005. Study on Effects of Irrigation Frequency on Moisture and Salt Regime and Growth of Cotton Under Mulch-film Drip Irrigation. Journal of Irrigation and Drainage 24(3), 12-15.	Usu, Xinjiang	China
135	Zhang, G., Shen, D., Ming, B., Xie, R., Jin, X., Liu, C., Hou, P., Xue, J., Chen, J., Zhang, W., Liu, W., Wang, K., Li, S., 2019. Using irrigation intervals to optimize water-use efficiency and maize yield in Xinjiang, northwest China. Crop Journal 7(3), 322-334.	Qitai, Xinjiang	China
136	Liu, Y., Yang, G., Zhang, J., Song, J., Li, N., Duan, A., 2008. Irrigation Scheduling Based on Meteorological Data for Cotton with Drip Irrigation under Plastic Film Mulch in North Xinjiang. Journal of Irrigation and Drainage 27(3), 37-40.	Xinjiang	China
137	Yang, C., Luo, Y., Sun, L., Wu, N., 2015. Effect of Deficit Irrigation on the Growth, Water Use Characteristics and Yield of Cotton in Arid Northwest China. Pedosphere 25(6), 910-924.	Shihezi, Xinjiang	China
138	Wu, L., Zhang, F., Zhou, H., Suo, Y., Xue, F., Zhou, J., Liang, F., 2014. Effect of drip irrigation and fertilizer application on water use efficiency and cotton yield in North of Xinjiang. Transactions of the Chinese Society of Agricultural Engineering 30(20), 137-146.	Shihezi, Xinjiang	China
139	Wu, L., Zhang, F., Fan, J., Zhou, H., Liang, F., Gao, Z., 2015. Effects of Water and Fertilizer Coupling on Cotton Yield, Net Benefits and Water Use Efficiency. Transactions of the Chinese Society for Agricultural Machinery 46(12), 164-172.	Shihezi, Xinjiang	China
140	Wu, F., Wang, L., Lin, T., Wang, J., Guo, R., Yue, L., Tang, Q., 2016. Effect of Plastic Film on Evapotranspiration and Evaporation of Cottons under Drip Irrigation in Southern Xinjiang. Acat Agriculturae Boreali-Occidentalis Sinica 25(11), 1636-1642.	Aksu, Xinjiang	China
141	Wang, L., Lin, T., Yan, C., Wang, J., Guo, R., Yue, L., Tang, Q., 2016. Effects of plastic film residue on evapotranspiration and soil evaporation in cotton field of Xinjiang. Transactions of the Chinese Society of Agricultural Engineering 32(14), 120-128.	Aksu, Xinjiang	China
142	Wang, H., Zhang, F., Wu, L., Zhou, J., Xiang, Y., Li, J., Fang, D., 2015. Dosage effects of dripping fertilization on cotton growth, nutrient uptake and yield. Agricultural Research in the Arid Areas 33(4), 98-104,250.	Shihezi, Xinjiang	China
143	Min, W., Hou, Z., Ye, J., Liu, X., Li, S., Wu, M., 2013. Effects of water salinity and nitrogen rate on yield, WUE and NUE of cotton under drip irrigation with saline water conditions. Journal of Plant Nutrition and Fertitizer 19(4), 858-867.	Shihezi, Xinjiang	China
144	Ma, J., Liu, L., Li, X., Wang, J., Yang, H., 2015. Evapotranspiration process of cotton field under mulched drip irrigation of oasis in arid region. Chinese Journal of Ecology 34(4), 974-981.	Manas County, Xinjiang	China
145	Liu, X., Zhang, F., Xiang, Y., Hou, X., Zhang, Y., He, P., Xue, Z., Fan, J., 2020. Effects of deficit irrigation on cotton growth and water use in southern Xinjiang of China. Journal of Drainage and Irrigation Machinery Engineering 38(12), 1270-1276.	Weili, Korla, Xinjiang	China
146	Liu, J., Zhou, S., Jin, L., Wang, J., Yang, J., 2012. Evapotranspiration of a Film-mulched Cotton Field under Drip Irrigation in North Xinjiang. Arid Zone Research 29(2), 360-368.	Wulanwusu, Xinjiang	China
147	Li, Y., Zhang, F., Hou, X., Yan, F., Xiao, C., Li, J., Cheng, H., 2021. Effects of planting density and water-nitrogen interaction on cotton growth and water-nitrogen utilization in southern Xinjiang. Journal of Northwest A & F University. Natural Science Edition 49(9), 45-56,66.	Weili, Korla, Xinjiang	China
148	Li, Y., Wang, F., Sun, J., Zhang, J., Sun, C., Zhang, H., Gong, X., 2015. Effects of Irrigation Amount on Root Growth and Yield of Mechanical-harvesting Cotton under Mulched Drip Irrigation in Inner Mongolia West Desert Area. Journal of Irrigation and Drainage 34(11), 18-23.	Alashan, Inner Mongolia	China
149	Hu, Z., Hou, Z., Min, W., Ye, J., Wu, Y., 2018. Effects of Subsurface Impermeable Film on Cotton Yield and Water Use Efficiency in Drip-irrigated Cotton Field. Arid Zone Research 35(4), 779-788.	Shihezi, Xinjiang	China
150	Hu, Q., Cao, H., He, Z., Ding, B., Zhang, Y., 2022. Combined Effect of Drip Irrigation Amount and Straw Mulch on Growth and Yield of Cotton in Salinized Soils in Northern Xinjiang. Journal of Irrigation and Drainage 41(5), 27-33.	Paotai, Xinjiang	China
151	Ba, J., Jin, W., Xi, C., Geping, L., Hao, S., Longhui, L., Junli, L., 2015. Seasonal and inter-annual variations in carbon fluxes and evapotranspiration over cotton field under drip irrigation with plastic mulch in an arid region of Northwest China. Journal of Arid Land 7(2), 272-284.	Wulanwusu, Xinjiang	China
152	Fan, K., Gao, Y., Wang, X., Wang, H., Duan, A., 2019. Study on cotton drip irrigation under film mulching in southern Xinjiang based on meteorological information. Agricultural Research in the Arid Areas 37(3), 83-90.	Alar, Xinjiang	China

## Sheet: EC
bulk	Salinity of irrigation water g/L	SMP -kPa	Average temperature	Total precipitation (mm)	Irrigation (mm)	depth (cm)	Distance from dripper cm	Forest year	Days after irrigation	conductivity mS/cm			Bulk density	Salinity of irrigation water g/L	SMP -kPa	Average temperature	Total precipitation (mm)	Irrigation (mm)	depth (cm)	Soil porosity	pH	Distance from drip	Year	Days after irrigation	soil salt (g/kg)
1.5	1	5	27	50.76	480	20	0	10	8	2.07
1.5	1	5	27	50.76	480	20	0	8	8	1.02			1.47	1	5	6.2	43.6	816.15	10	46.35		0	22	180	0.52968
1.5	1	5	27	50.76	480	20	0	11	8	3.29			1.47	1	5	6.2	43.6	816.15	20	46.35		0	22	180	0.75396
1.5	1	5	27	50.76	300	20	0	15	8	5.31			1.47	1	5	6.2	43.6	816.15	30	46.35		0	22	180	0.71551
1.5	1	5	27	50.76	480	40	0	10	8	1.34			1.47	1	5	6.2	43.6	816.15	40	46.35		0	22	180	0.60658
1.5	1	5	27	50.76	480	40	0	8	8	0.69			1.53	1	5	6.2	43.6	816.15	50	44.16		0	22	180	0.34386
1.5	1	5	27	50.76	480	40	0	11	8	2.28			1.53	1	5	6.2	43.6	816.15	60	44.16		0	22	180	0.27337
1.5	1	5	27	50.76	300	40	0	15	8	2.46			1.53	1	5	6.2	43.6	816.15	70	44.16		0	22	180	0.42075
1.5	1	5	27	50.76	480	60	0	10	8	1.5			1.53	1	5	6.2	43.6	816.15	80	44.16		0	22	180	0.23493
1.5	1	5	27	50.76	480	60	0	8	8	0.8			1.53	1	5	6.2	43.6	816.15	90	44.16		0	22	180	0.27337
1.5	1	5	27	50.76	480	60	0	11	8	2.54			1.53	1	5	6.2	43.6	816.15	100	44.16		0	22	180	0.42075
1.5	1	5	27	50.76	300	60	0	15	8	2.39			1.53	1	5	6.2	43.6	816.15	120	44.16		0	22	180	0.42075
1.5	1	5	27	50.76	480	80	0	10	8	1.19			1.53	1	5	6.2	43.6	816.15	140	44.16		0	22	180	0.42075
1.5	1	5	27	50.76	480	80	0	8	8	0.45			1.53	1	5	6.2	43.6	816.15	160	44.16		0	22	180	0.82444
1.5	1	5	27	50.76	480	80	0	11	8	2.43			1.53	1	5	6.2	43.6	816.15	180	44.16		0	22	180	0.42075
1.5	1	5	27	50.76	300	80	0	15	8	2.34			1.53	1	5	6.2	43.6	816.15	200	44.16		0	22	180	0.63862
1.5	1	5	27	50.76	480	100	0	10	8	1.19			1.43	1	5	6.2	43.6	816.15	10	47.81		0	14	180	2.00348
1.5	1	5	27	50.76	480	100	0	8	8	0.77			1.43	1	5	6.2	43.6	816.15	20	47.81		0	14	180	2.37514
1.5	1	5	27	50.76	480	100	0	11	8	2.39			1.43	1	5	6.2	43.6	816.15	30	47.81		0	14	180	1.1192
1.5	1	5	27	50.76	300	100	0	15	8	2.01			1.43	1	5	6.2	43.6	816.15	40	47.81		0	14	180	1.49086
1.5	1	5	27	50.76	480	120	0	10	8	1.84			1.47	1	5	6.2	43.6	816.15	50	46.35		0	14	180	1.49086
1.5	1	5	27	50.76	480	120	0	8	8	0.73			1.47	1	5	6.2	43.6	816.15	60	46.35		0	14	180	1.37552
1.5	1	5	27	50.76	480	120	0	11	8	2.57			1.47	1	5	6.2	43.6	816.15	70	46.35		0	14	180	0.71551
1.5	1	5	27	50.76	300	120	0	15	8	2.15			1.47	1	5	6.2	43.6	816.15	80	46.35		0	14	180	1.08076
1.5	1	5	27	50.76	480	150	0	10	8	1.51			1.47	1	5	6.2	43.6	816.15	90	46.35		0	14	180	1.08076
1.5	1	5	27	50.76	480	150	0	8	8	1.22			1.47	1	5	6.2	43.6	816.15	100	46.35		0	14	180	1.22814
1.5	1	5	27	50.76	480	150	0	11	8	2.3			1.66	1	5	6.2	43.6	816.15	120	39.42		0	14	180	1.63824
1.5	1	5	27	50.76	300	150	0	15	8	2			1.66	1	5	6.2	43.6	816.15	140	39.42		0	14	180	2.08038
1.5	1	5	25.4	182.5	0	20	0	1	0	7.45112			1.66	1	5	6.2	43.6	816.15	160	39.42		0	14	180	1.8561
1.5	1	5	25.4	182.5	0	20	0	1	0	7.81348			1.66	1	5	6.2	43.6	816.15	180	39.42		0	14	180	1.59979
1.5	1	5	25.4	182.5	0	20	0	1	0	8.25212			1.66	1	5	6.2	43.6	816.15	200	39.42		0	14	180	1.1961
1.5	1	5	25.4	182.5	0	20	0	1	0	3.83391			1.45	1	5	6.2	43.6	816.15	10	47.08		0	12	180	0.67706
1.5	1	5	25.4	182.5	0	20	0	1	0	5.00362			1.45	1	5	6.2	43.6	816.15	20	47.08		0	12	180	0.82444
1.5	1	5	25.4	182.5	80	20	0	1	0	5.65841			1.45	1	5	6.2	43.6	816.15	30	47.08		0	12	180	0.75396
1.5	1	5	25.4	182.5	67.5	20	0	1	20	3.28084			1.45	1	5	6.2	43.6	816.15	40	47.08		0	12	180	2.08038
1.5	1	5	25.4	182.5	67.5	20	0	1	35	3.83391			1.46	1	5	6.2	43.6	816.15	50	46.72		0	12	180	1.67028
1.5	1	5	25.4	182.5	67.5	20	0	1	45	4.63491			1.46	1	5	6.2	43.6	816.15	60	46.72		0	12	180	3.03514
1.5	1	5	25.4	182.5	67.5	20	0	1	51	4.67305			1.46	1	5	6.2	43.6	816.15	70	46.72		0	12	180	1.04872
1.5	1	5	25.4	182.5	67.5	20	0	1	60	3.83391			1.46	1	5	6.2	43.6	816.15	80	46.72		0	12	180	0.82444
1.58	1	5	11.48	60	417.333	10	0	3	180	0.36083			1.46	1	5	6.2	43.6	816.15	90	46.72		0	12	180	0.82444
1.596	1	5	11.48	60	417.333	20	0	3	180	0.30605			1.46	1	5	6.2	43.6	816.15	100	46.72		0	12	180	2.6699
1.612	1	5	11.48	60	417.333	30	0	3	180	0.27524			1.53	1	5	6.2	43.6	816.15	120	44.16		0	12	180	4.29108
1.628	1	5	11.48	60	417.333	40	0	3	180	0.18775			1.53	1	5	6.2	43.6	816.15	140	44.16		0	12	180	4.58584
1.644	1	5	11.48	60	417.333	50	0	3	180	0.179			1.53	1	5	6.2	43.6	816.15	160	44.16		0	12	180	2.593
1.66	1	5	11.48	60	417.333	60	0	3	180	0.21209			1.53	1	5	6.2	43.6	816.15	180	44.16		0	12	180	1.96504
1.676	1	5	11.48	60	417.333	80	0	3	180	0.21209			1.53	1	5	6.2	43.6	816.15	200	44.16		0	12	180	2.92621
1.692	1	5	11.48	60	417.333	100	0	3	180	0.18585			1.44	1	5	6.2	43.6	816.15	10	47.45		0	8	180	2.00348
1.708	1	5	11.48	60	417.333	120	0	3	180	0.18775			1.44	1	5	6.2	43.6	816.15	20	47.45		0	8	180	2.48407
1.74	1	5	11.48	60	417.333	150	0	3	180	0.19003			1.44	1	5	6.2	43.6	816.15	30	47.45		0	8	180	1.22814
1.58	1	5	11.48	60	527.667	10	0	3	180	0.54229			1.44	1	5	6.2	43.6	816.15	40	47.45		0	8	180	1.63824
1.596	1	5	11.48	60	527.667	20	0	3	180	0.39773			1.51	1	5	6.2	43.6	816.15	50	44.89		0	8	180	4.65632
1.612	1	5	11.48	60	527.667	30	0	3	180	0.39773			1.51	1	5	6.2	43.6	816.15	60	44.89		0	8	180	2.84932
1.628	1	5	11.48	60	527.667	40	0	3	180	0.48523			1.51	1	5	6.2	43.6	816.15	70	44.89		0	8	180	1.41396
1.644	1	5	11.48	60	527.667	50	0	3	180	0.65375			1.51	1	5	6.2	43.6	816.15	80	44.89		0	8	180	1.1961
1.66	1	5	11.48	60	527.667	60	0	3	180	0.84623			1.51	1	5	6.2	43.6	816.15	90	44.89		0	8	180	1.30503
1.676	1	5	11.48	60	527.667	80	0	3	180	0.73896			1.51	1	5	6.2	43.6	816.15	100	44.89		0	8	180	3.29146
1.692	1	5	11.48	60	527.667	100	0	3	180	0.48294			1.61	1	5	6.2	43.6	816.15	120	41.24		0	8	180	5.24584
1.708	1	5	11.48	60	527.667	120	0	3	180	0.38708			1.61	1	5	6.2	43.6	816.15	140	41.24		0	8	180	3.99632
1.74	1	5	11.48	60	527.667	150	0	3	180	0.37377			1.61	1	5	6.2	43.6	816.15	160	41.24		0	8	180	3.81049
1.58	1	5	11.48	60	476	10	0	3	180	1.53743			1.61	1	5	6.2	43.6	816.15	180	41.24		0	8	180	3.7336
1.596	1	5	11.48	60	476	20	0	3	180	1.55912			1.61	1	5	6.2	43.6	816.15	200	41.24		0	8	180	3.81049
1.612	1	5	11.48	60	476	30	0	3	180	1.36891			1.74	1	5	6.2	43.6	816.15	10	36.5		0	0	180	7.27071
1.628	1	5	11.48	60	476	40	0	3	180	1.25745			1.74	1	5	6.2	43.6	816.15	20	36.5		0	0	180	7.41809
1.644	1	5	11.48	60	476	50	0	3	180	1.06725			1.74	1	5	6.2	43.6	816.15	30	36.5		0	0	180	6.23905
1.66	1	5	11.48	60	476	60	0	3	180	0.86601			1.74	1	5	6.2	43.6	816.15	40	36.5		0	0	180	8.41771
1.676	1	5	11.48	60	476	80	0	3	180	0.50729			1.71	1	5	6.2	43.6	816.15	50	37.59		0	0	180	9.26354
1.692	1	5	11.48	60	476	100	0	3	180	0.45251			1.71	1	5	6.2	43.6	816.15	60	37.59		0	0	180	8.4882
1.708	1	5	11.48	60	476	120	0	3	180	0.49398			1.71	1	5	6.2	43.6	816.15	70	37.59		0	0	180	6.05963
1.74	1	5	11.48	60	476	150	0	3	180	0.51604			1.71	1	5	6.2	43.6	816.15	80	37.59		0	0	180	6.38643
1.33	1	5	9.1	105.3	666.4	20	0	1	117	0.76			1.71	1	5	6.2	43.6	816.15	90	37.59		0	0	180	4.02835
1.43	1	5	9.1	105.3	666.4	60	0	1	117	1.16			1.71	1	5	6.2	43.6	816.15	100	37.59		0	0	180	4.50894
1.47	1	5	9.1	105.3	666.4	100	0	1	117	2.12			1.74	1	5	6.2	43.6	816.15	120	36.5		0	0	180	7.23867
1.47	1	5	9.1	105.3	666.4	120	0	1	117	1.35			1.74	1	5	6.2	43.6	816.15	140	36.5		0	0	180	7.41809
1.25	1	5	8.4	105.7	637	20	0	2	138	0.65			1.74	1	5	6.2	43.6	816.15	160	36.5		0	0	180	6.68119
1.32	1	5	8.4	105.7	637	60	0	2	138	0.7			1.74	1	5	6.2	43.6	816.15	180	36.5		0	0	180	6.16857
1.53	1	5	8.4	105.7	637	100	0	2	138	1.04			1.74	1	5	6.2	43.6	816.15	200	36.5		0	0	180	5.39322
1.53	1	5	8.4	105.7	637	120	0	2	138	0.8			1.37	1	5	5.1	56.5	816.15	10	50		0	22	180	0.51458
1.32	1	5	8.3	108.9	646.8	20	0	3	151	0.43			1.37	1	5	5.1	56.5	816.15	20	50		0	22	180	0.83784
1.49	1	5	8.3	108.9	646.8	60	0	3	151	0.75			1.37	1	5	5.1	56.5	816.15	30	50		0	22	180	0.76812
1.51	1	5	8.3	108.9	646.8	100	0	3	151	1.11			1.37	1	5	5.1	56.5	816.15	40	50		0	22	180	0.5843
1.51	1	5	8.3	108.9	646.8	120	0	3	151	0.78			1.46	1	5	5.1	56.5	816.15	50	46.72		0	22	180	0.43851
1.33	1	10	9.1	105.3	460.5	20	0	1	117	0.84			1.46	1	5	5.1	56.5	816.15	60	46.72		0	22	180	0.36879
1.43	1	10	9.1	105.3	460.5	60	0	1	117	1.28			1.46	1	5	5.1	56.5	816.15	70	46.72		0	22	180	0.43851
1.47	1	10	9.1	105.3	460.5	100	0	1	117	2.47			1.46	1	5	5.1	56.5	816.15	80	46.72		0	22	180	0.36879
1.47	1	10	9.1	105.3	460.5	120	0	1	117	1.53			1.46	1	5	5.1	56.5	816.15	90	46.72		0	22	180	0.51458
1.25	1	10	8.4	105.7	460.6	20	0	2	138	1.18			1.46	1	5	5.1	56.5	816.15	100	46.72		0	22	180	0.43851
1.32	1	10	8.4	105.7	460.6	60	0	2	138	1.62			1.47	1	5	5.1	56.5	816.15	120	46.35		0	22	180	0.47655
1.53	1	10	8.4	105.7	460.6	100	0	2	138	2.98			1.47	1	5	5.1	56.5	816.15	140	46.35		0	22	180	0.80615
1.53	1	10	8.4	105.7	460.6	120	0	2	138	1.93			1.47	1	5	5.1	56.5	816.15	160	46.35		0	22	180	0.43851
1.32	1	10	8.3	108.9	548.8	20	0	3	151	1.2			1.47	1	5	5.1	56.5	816.15	180	46.35		0	22	180	0.66036
1.49	1	10	8.3	108.9	548.8	60	0	3	151	2.27			1.47	1	5	5.1	56.5	816.15	200	46.35		0	22	180	0.91391
1.51	1	10	8.3	108.9	548.8	100	0	3	151	2.72			1.34	1	5	5.1	56.5	816.15	10	51.1		0	14	180	0.83784
1.51	1	10	8.3	108.9	548.8	120	0	3	151	2.09			1.34	1	5	5.1	56.5	816.15	20	51.1		0	14	180	0.43851
1.33	1	15	9.1	105.3	294	20	0	1	117	2.1			1.34	1	5	5.1	56.5	816.15	30	51.1		0	14	180	0.51458
1.43	1	15	9.1	105.3	294	60	0	1	117	3.84			1.34	1	5	5.1	56.5	816.15	40	51.1		0	14	180	1.16745
1.47	1	15	9.1	105.3	294	100	0	1	117	3.48			1.42	1	5	5.1	56.5	816.15	50	48.18		0	14	180	1.16745
1.47	1	15	9.1	105.3	294	120	0	1	117	3.14			1.42	1	5	5.1	56.5	816.15	60	48.18		0	14	180	1.64284
1.25	1	15	8.4	105.7	372.4	20	0	2	138	1.48			1.42	1	5	5.1	56.5	816.15	70	48.18		0	14	180	1.02166
1.32	1	15	8.4	105.7	372.4	60	0	2	138	2.87			1.42	1	5	5.1	56.5	816.15	80	48.18		0	14	180	0.95194
1.53	1	15	8.4	105.7	372.4	100	0	2	138	3.99			1.42	1	5	5.1	56.5	816.15	90	48.18		0	14	180	1.02166
1.53	1	15	8.4	105.7	372.4	120	0	2	138	2.78			1.42	1	5	5.1	56.5	816.15	100	48.18		0	14	180	0.76812
1.32	1	15	8.3	108.9	372.4	20	0	3	151	2.01			1.57	1	5	5.1	56.5	816.15	120	42.7		0	14	180	0.87587
1.49	1	15	8.3	108.9	372.4	60	0	3	151	2.53			1.57	1	5	5.1	56.5	816.15	140	42.7		0	14	180	1.16745
1.51	1	15	8.3	108.9	372.4	100	0	3	151	2.71			1.57	1	5	5.1	56.5	816.15	160	42.7		0	14	180	1.20548
1.51	1	15	8.3	108.9	372.4	120	0	3	151	2.4			1.57	1	5	5.1	56.5	816.15	180	42.7		0	14	180	1.45902
1.33	1	20	9.1	105.3	274.4	20	0	1	117	2.3			1.57	1	5	5.1	56.5	816.15	200	42.7		0	14	180	1.35127
1.43	1	20	9.1	105.3	274.4	60	0	1	117	4.23			1.38	1	5	5.1	56.5	816.15	10	49.64		0	12	180	2.18795
1.47	1	20	9.1	105.3	274.4	100	0	1	117	3.78			1.38	1	5	5.1	56.5	816.15	20	49.64		0	12	180	1.78862
1.47	1	20	9.1	105.3	274.4	120	0	1	117	3.43			1.38	1	5	5.1	56.5	816.15	30	49.64		0	12	180	2.04217
1.25	1	20	8.4	105.7	362.6	20	0	2	138	1.75			1.38	1	5	5.1	56.5	816.15	40	49.64		0	12	180	2.58728
1.32	1	20	8.4	105.7	362.6	60	0	2	138	2.71			1.41	1	5	5.1	56.5	816.15	50	48.54		0	12	180	2.0802
1.53	1	20	8.4	105.7	362.6	100	0	2	138	3.98			1.41	1	5	5.1	56.5	816.15	60	48.54		0	12	180	1.31323
1.53	1	20	8.4	105.7	362.6	120	0	2	138	2.81			1.41	1	5	5.1	56.5	816.15	70	48.54		0	12	180	0.73009
1.32	1	20	8.3	108.9	274.4	20	0	3	151	1.41			1.41	1	5	5.1	56.5	816.15	80	48.54		0	12	180	0.62233
1.49	1	20	8.3	108.9	274.4	60	0	3	151	1.28		Zhang 2020	1.41	1	5	5.1	56.5	816.15	90	48.54		0	12	180	0.66036
1.51	1	20	8.3	108.9	274.4	100	0	3	151	1.84			1.41	1	5	5.1	56.5	816.15	100	48.54		0	12	180	2.58728
1.51	1	20	8.3	108.9	274.4	120	0	3	151	1.51			1.48	1	5	5.1	56.5	816.15	120	45.99		0	12	180	2.80913
1.33	1	25	9.1	105.3	254.8	20	0	1	117	2.21			1.48	1	5	5.1	56.5	816.15	140	45.99		0	12	180	2.37177
1.43	1	25	9.1	105.3	254.8	60	0	1	117	4.23			1.48	1	5	5.1	56.5	816.15	160	45.99		0	12	180	2.47953
1.47	1	25	9.1	105.3	254.8	100	0	1	117	3.69			1.48	1	5	5.1	56.5	816.15	180	45.99		0	12	180	1.49705
1.47	1	25	9.1	105.3	254.8	120	0	1	117	3.41			1.48	1	5	5.1	56.5	816.15	200	45.99		0	12	180	1.78862
1.25	1	25	8.4	105.7	245	20	0	2	138	1.92			1.35	1	5	5.1	56.5	816.15	10	50.73		0	8	180	2.84716
1.32	1	25	8.4	105.7	245	60	0	2	138	2.83			1.35	1	5	5.1	56.5	816.15	20	50.73		0	8	180	3.02464
1.53	1	25	8.4	105.7	245	100	0	2	138	3.64			1.35	1	5	5.1	56.5	816.15	30	50.73		0	8	180	2.66334
1.53	1	25	8.4	105.7	245	120	0	2	138	2.8			1.35	1	5	5.1	56.5	816.15	40	50.73		0	8	180	2.80913
1.32	1	25	8.3	108.9	235.2	20	0	3	151	1.61			1.42	1	5	5.1	56.5	816.15	50	48.18		0	8	180	2.91689
1.49	1	25	8.3	108.9	235.2	60	0	3	151	2.46			1.42	1	5	5.1	56.5	816.15	60	48.18		0	8	180	2.37177
1.51	1	25	8.3	108.9	235.2	100	0	3	151	3.05			1.42	1	5	5.1	56.5	816.15	70	48.18		0	8	180	1.42099
1.51	1	25	8.3	108.9	235.2	120	0	3	151	2.41	Fertilization kg N/ha	cotton yield kg/ha	1.42	1	5	5.1	56.5	816.15	80	48.18		0	8	180	1.05969
1.42	1	5	12.8	387.603	73.5715	100	0	1	180	2.45812	102	3876	1.42	1	5	5.1	56.5	816.15	90	48.18		0	8	180	1.78862
1.42	1	5	12.8	447.692	73.5715	100	0	2	180	2.51932	102	3876	1.42	1	5	5.1	56.5	816.15	100	48.18		0	8	180	2.99295
1.42	1	5	12.8	480.872	75.1391	100	0	3	180	2.40202	102	2869	1.54	1	5	5.1	56.5	816.15	120	43.8		0	8	180	4.01345
1.42	1	5	12.8	474.863	223.795	100	0	4	180	2.51932	102	2858.3	1.54	1	5	5.1	56.5	816.15	140	43.8		0	8	180	2.95492
1.42	1	5	12.8	479.304	223.795	100	0	5	180	2.69272	102	3654.3	1.54	1	5	5.1	56.5	816.15	160	43.8		0	8	180	3.462
1.42	1	5	12.8	435.674	222.227	100	0	6	180	3.66173	112.5	3616.4	1.54	1	5	5.1	56.5	816.15	180	43.8		0	8	180	3.02464
1.42	1	5	12.8	528.943	73.5715	100	0	7	180	3.04462	112.5	2919.3	1.54	1	5	5.1	56.5	816.15	200	43.8		0	8	180	3.97542
1.42	1	5	12.8	542.267	75.1391	100	0	8	180	2.07562	112.5	3005.9	1.61	1	5	5.1	56.5	816.15	10	41.24		0	0	180	7.8356
1.42	1	5	12.8	333.523	69.1301	100	0	9	180	3.30982	112.5	3677.23	1.61	1	5	5.1	56.5	816.15	20	41.24		0	0	180	5.68683
1.42	1	5	12.8	429.665	147.246	100	0	10	180	2.10622	112.5	3642.13	1.61	1	5	5.1	56.5	816.15	30	41.24		0	0	180	4.85014
1.32	1	5	12.8	40	526.76	60	0	1	180	1.48459	112.5	3293.37	1.61	1	5	5.1	56.5	816.15	40	41.24		0	0	180	6.52352
1.32	1	5	12.8	60	514.69	60	0	2	180	1.18934	112.5	4562.87	1.55	1	5	5.1	56.5	816.15	50	43.43		0	0	180	6.01644
1.32	1	5	12.8	80	394.64	60	0	3	180	2.13775	112.5	3923.06	1.55	1	5	5.1	56.5	816.15	60	43.43		0	0	180	8.34902
1.45	1	5	7.2	166	450	10	0	1	180	5.63045	225	6277.48	1.55	1	5	5.1	56.5	816.15	70	43.43		0	0	180	3.35425
1.46	1	5	7.2	166	450	20	0	1	180	5.88065			1.55	1	5	5.1	56.5	816.15	80	43.43		0	0	180	5.24947
1.52	1	5	7.2	166	450	30	0	1	180	6.41857			1.55	1	5	5.1	56.5	816.15	90	43.43		0	0	180	3.28452
1.53	1	5	7.2	166	450	40	0	1	180	6.81889			1.55	1	5	5.1	56.5	816.15	100	43.43		0	0	180	3.28452
1.54	1	5	7.2	166	450	50	0	1	180	7.50068			1.63	1	5	5.1	56.5	816.15	120	40.51		0	0	180	3.43031
1.59	1	5	7.2	166	450	60	0	1	180	6.85016			1.63	1	5	5.1	56.5	816.15	140	40.51		0	0	180	4.01345
1.67	1	5	7.2	166	450	70	0	1	180	8.07613			1.63	1	5	5.1	56.5	816.15	160	40.51		0	0	180	8.12717
1.63	1	5	7.2	166	450	80	0	1	180	8.2888			1.63	1	5	5.1	56.5	816.15	180	40.51		0	0	180	7.03694
1.63	1	5	7.2	166	450	90	0	1	180	7.46315			1.63	1	5	5.1	56.5	816.15	200	40.51		0	0	180	7.1447	ET0 mm/M	ET0 mm/D
1.63	1	5	7.2	166	450	100	0	1	180	6.74383			1.46	1	5	10.8	70.61	354	100		7.645	0	1	10	1.49	1129.43	37.02
1.48	1	5	7.2	153.8	450	10	0	2	180	5.2236			1.46	1	5	10.8	70.61	423	100		7.645	0	1	10	1.46	1129.43	37.02
1.36	1	5	7.2	153.8	450	20	0	2	180	5.94056	225	6212.45	1.46	1	5	10.8	70.61	500	100		7.645	0	1	10	1.37	1129.43	37.02
1.34	1	5	7.2	153.8	450	30	0	2	180	6.65752			1.46	1	5	10.8	70.61	354	100		7.645	0	1	10	1.45	1129.43	37.02
1.36	1	5	7.2	153.8	450	40	0	2	180	6.83832			1.46	1	5	10.8	70.61	423	100		7.645	0	1	10	1.31	1129.43	37.02
1.4	1	5	7.2	153.8	450	50	0	2	180	7.76725			1.46	1	5	10.8	70.61	500	100		7.645	0	1	10	1.28	1129.43	37.02
1.42	1	5	7.2	153.8	450	60	0	2	180	7.59268			1.46	1	5	10.8	70.61	354	100		7.645	0	2	10	2.13	1111.67	36.52
1.51	1	5	7.2	153.8	450	70	0	2	180	8.05403			1.46	1	5	10.8	70.61	423	100		7.645	0	2	10	1.68	1111.67	36.52
1.36	1	5	7.2	153.8	450	80	0	2	180	6.30216			1.46	1	5	10.8	70.61	500	100		7.645	0	2	10	1.74	1111.67	36.52
1.36	1	5	7.2	153.8	450	90	0	2	180	6.48296			1.46	1	5	10.8	70.61	354	100		7.645	0	2	10	1.91	1111.67	36.52
1.36	1	5	7.2	153.8	450	100	0	2	180	6.80091			1.46	1	5	10.8	70.61	423	100		7.645	0	2	10	1.44	1111.67	36.52
1.36	1	5	25.4	182.5	0	20	0	1	251	14.5775			1.46	1	5	10.8	70.61	500	100		7.645	0	2	10	1.61	1111.67	36.52
1.36	1	5	25.4	182.5	0	20	0	1	251	14.5775			1.46	1	5	10.8	70.61	354	100		7.645	0	3	10	1.81	940.72	30.83
1.36	1	5	25.4	182.5	45	20	0	1	251	14.9462			1.46	1	5	10.8	70.61	423	100		7.645	0	3	10	1.67	940.72	30.83
1.36	1	5	25.4	182.5	60	20	0	1	251	15.6773			1.46	1	5	10.8	70.61	500	100		7.645	0	3	10	1.65	940.72	30.83
1.36	1	5	25.4	182.5	60	20	0	1	251	10.8522			1.46	1	5	10.8	70.61	354	100		7.645	0	3	10	1.75	940.72	30.83
1.36	1	5	25.4	182.5	60	20	0	1	251	10.884			1.46	1	5	10.8	70.61	423	100		7.645	0	3	10	1.67	940.72	30.83
1.36	1	5	25.4	182.5	60	20	0	1	251	10.6678			1.46	1	5	10.8	70.61	500	100		7.645	0	3	10	1.45	940.72	30.83
1.36	1	5	25.4	182.5	60	20	0	1	251	10.1529			1.46	1	5	10.8	70.61	354	100		7.645	0	4	10	2.71	991.81	34.2
1.36	1	5	25.4	182.5	60	20	0	1	251	6.93619			1.46	1	5	10.8	70.61	423	100		7.645	0	4	10	1.98	991.81	34.2
1.36	1	5	25.4	182.5	60	20	0	1	251	7.41298			1.46	1	5	10.8	70.61	500	100		7.645	0	4	10	1.78	991.81	34.2
1.36	1	5	25.4	182.5	0	20	0	1	251	7.45112			1.46	1	5	10.8	70.61	354	100		7.645	0	4	10	2.08	991.81	34.2
1.36	1	5	25.4	182.5	0	20	0	1	251	7.81348			1.46	1	5	10.8	70.61	423	100		7.645	0	4	10	1.79	991.81	34.2
1.36	1	5	25.4	182.5	0	20	0	1	251	8.25212			1.46	1	5	10.8	70.61	500	100		7.645	0	4	10	1.82	991.81	34.2
1.36	1	5	25.4	182.5	0	20	0	1	251	3.83391			1.58	1	5	11	18.6	219.2	10			0	1	150	6.1
1.36	1	5	25.4	182.5	0	20	0	1	251	5.00362			1.6	1	5	11	18.6	219.2	20			0	1	150	6.15
1.36	1	5	25.4	182.5	80	20	0	1	251	5.65841			1.59	1	5	11	18.6	219.2	30			0	1	150	6.45
1.36	1	5	25.4	182.5	67.5	20	0	1	251	3.28084			1.56	1	5	11	18.6	219.2	40			0	1	150	4.92
1.36	1	5	25.4	182.5	67.5	20	0	1	251	3.83391			1.63	1	5	11	18.6	219.2	60			0	1	150	4.19
1.36	1	5	25.4	182.5	67.5	20	0	1	251	4.63491			1.64	1	5	11	18.6	219.2	80			0	1	150	2.78
1.36	1	5	25.4	182.5	67.5	20	0	1	251	4.67305			1.58	1	5	11	18.6	281.3	10			0	1	150	5.72
1.36	1	5	25.4	182.5	67.5	20	0	1	251	3.83391			1.6	1	5	11	18.6	281.3	20			0	1	150	5.08
1.33	1	5	8	67.3	666.4	20	0	1	117	0.76			1.59	1	5	11	18.6	281.3	30			0	1	150	6.08
1.43	1	5	8	67.3	666.4	60	0	1	117	1.16			1.56	1	5	11	18.6	281.3	40			0	1	150	5.15
1.47	1	5	8	67.3	666.4	100	0	1	117	2.12			1.63	1	5	11	18.6	281.3	60			0	1	150	3.94
1.47	1	5	8	67.3	666.4	120	0	1	117	1.35			1.64	1	5	11	18.6	281.3	80			0	1	150	3.13
1.25	1	5	8	114.6	637	20	0	2	138	0.65			1.58	1	5	11	18.6	343.3	10			0	1	150	4
1.32	1	5	8	114.6	637	60	0	2	138	0.7			1.6	1	5	11	18.6	343.3	20			0	1	150	4.41
1.53	1	5	8	114.6	637	100	0	2	138	1.04			1.59	1	5	11	18.6	343.3	30			0	1	150	4.58
1.53	1	5	8	114.6	637	120	0	2	138	0.8			1.56	1	5	11	18.6	343.3	40			0	1	150	4.25
1.32	1	5	8	70.4	646.8	20	0	3	151	0.43			1.63	1	5	11	18.6	343.3	60			0	1	150	3.76
1.49	1	5	8	70.4	646.8	60	0	3	151	0.75			1.64	1	5	11	18.6	343.3	80			0	1	150	3.01
1.51	1	5	8	70.4	646.8	100	0	3	151	1.11			1.58	1	5	11	18.6	405.4	10			0	1	150	3.37
1.51	1	5	8	70.4	646.8	120	0	3	151	0.78			1.6	1	5	11	18.6	405.4	20			0	1	150	3.46
1.33	1	10	8	67.3	460.6	20	0	1	117	0.84			1.59	1	5	11	18.6	405.4	30			0	1	150	3.78
1.43	1	10	8	67.3	460.6	60	0	1	117	1.28			1.56	1	5	11	18.6	405.4	40			0	1	150	3.58
1.47	1	10	8	67.3	460.6	100	0	1	117	2.47			1.63	1	5	11	18.6	405.4	60			0	1	150	3.87
1.47	1	10	8	67.3	460.6	120	0	1	117	1.53			1.64	1	5	11	18.6	405.4	80			0	1	150	3
1.25	1	10	8	114.6	460.6	20	0	2	138	1.18			1.58	1	5	11	22.8	196.18	10			0	2	150	4.97
1.32	1	10	8	114.6	460.6	60	0	2	138	1.62			1.6	1	5	11	22.8	196.18	20			0	2	150	6.24
1.53	1	10	8	114.6	460.6	100	0	2	138	2.98			1.59	1	5	11	22.8	196.18	30			0	2	150	5.57
1.53	1	10	8	114.6	460.6	120	0	2	138	1.93			1.56	1	5	11	22.8	196.18	40			0	2	150	4.24
1.32	1	10	8	70.4	548.8	20	0	3	151	1.2			1.63	1	5	11	22.8	196.18	60			0	2	150	3.66
1.49	1	10	8	70.4	548.8	60	0	3	151	2.27			1.64	1	5	11	22.8	196.18	80			0	2	150	2.82
1.51	1	10	8	70.4	548.8	100	0	3	151	2.72			1.58	1	5	11	22.8	256.6	10			0	2	150	4.83
1.51	1	10	8	70.4	548.8	120	0	3	151	2.09			1.6	1	5	11	22.8	256.6	20			0	2	150	5.33
1.33	1	15	8	67.3	294	20	0	1	117	2.1			1.59	1	5	11	22.8	256.6	30			0	2	150	5.32
1.43	1	15	8	67.3	294	60	0	1	117	3.84			1.56	1	5	11	22.8	256.6	40			0	2	150	4.26
1.47	1	15	8	67.3	294	100	0	1	117	3.48			1.63	1	5	11	22.8	256.6	60			0	2	150	3.6
1.47	1	15	8	67.3	294	120	0	1	117	3.14			1.64	1	5	11	22.8	256.6	80			0	2	150	3.27
1.25	1	15	8	114.6	372.4	20	0	2	138	1.48			1.58	1	5	11	22.8	317	10			0	2	150	4.3
1.32	1	15	8	114.6	372.4	60	0	2	138	2.87			1.6	1	5	11	22.8	317	20			0	2	150	4.2
1.53	1	15	8	114.6	372.4	100	0	2	138	3.99			1.59	1	5	11	22.8	317	30			0	2	150	4.53
1.53	1	15	8	114.6	372.4	120	0	2	138	2.78			1.56	1	5	11	22.8	317	40			0	2	150	4.2
1.32	1	15	8	70.4	372.4	20	0	3	151	2.01			1.63	1	5	11	22.8	317	60			0	2	150	3.5
1.49	1	15	8	70.4	372.4	60	0	3	151	2.53			1.64	1	5	11	22.8	317	80			0	2	150	3.11
1.51	1	15	8	70.4	372.4	100	0	3	151	2.71			1.58	1	5	11	22.8	377.4	10			0	2	150	4.06
1.51	1	15	8	70.4	372.4	120	0	3	151	2.4			1.6	1	5	11	22.8	377.4	20			0	2	150	4.02
1.33	1	20	8	67.3	274.4	20	0	1	117	2.3			1.59	1	5	11	22.8	377.4	30			0	2	150	4.17
1.43	1	20	8	67.3	274.4	60	0	1	117	4.23			1.56	1	5	11	22.8	377.4	40			0	2	150	3.9
1.47	1	20	8	67.3	274.4	100	0	1	117	3.78			1.63	1	5	11	22.8	377.4	60			0	2	150	3.73
1.47	1	20	8	67.3	274.4	120	0	1	117	3.43			1.64	1	5	11	22.8	377.4	80			0	2	150	2.98
1.25	1	20	8	114.6	362.6	20	0	2	138	1.75			1.6	1	5	11	18.6	219.2	20			23	1	150	5.02
1.32	1	20	8	114.6	362.6	60	0	2	138	2.71			1.56	1	5	11	18.6	219.2	40			23	1	150	5.37
1.53	1	20	8	114.6	362.6	100	0	2	138	3.98			1.6	1	5	11	18.6	219.2	20			46	1	150	4.99
1.53	1	20	8	114.6	362.6	120	0	2	138	2.81			1.56	1	5	11	18.6	219.2	40			46	1	150	4.77
1.32	1	20	8	70.4	274.4	20	0	3	151	1.41			1.6	1	5	11	18.6	219.2	20			61	1	150	5.34
1.49	1	20	8	70.4	274.4	60	0	3	151	1.28			1.56	1	5	11	18.6	219.2	40			61	1	150	5.49
1.51	1	20	8	70.4	274.4	100	0	3	151	1.84			1.6	1	5	11	18.6	219.2	20			99	1	150	9.15
1.51	1	20	8	70.4	274.4	120	0	3	151	1.51			1.56	1	5	11	18.6	219.2	40			99	1	150	7.12
1.33	1	25	8	67.3	254.8	20	0	1	117	2.31			1.6	1	5	11	18.6	281.3	20			23	1	150	4.37
1.43	1	25	8	67.3	254.8	60	0	1	117	4.23			1.56	1	5	11	18.6	281.3	40			23	1	150	5.85
1.47	1	25	8	67.3	254.8	100	0	1	117	3.69			1.6	1	5	11	18.6	281.3	20			46	1	150	4.11
1.47	1	25	8	67.3	254.8	120	0	1	117	3.41			1.56	1	5	11	18.6	281.3	40			46	1	150	5.5
1.25	1	25	8	114.6	245	20	0	2	138	1.92			1.6	1	5	11	18.6	281.3	20			61	1	150	5.28
1.32	1	25	8	114.6	245	60	0	2	138	2.83			1.56	1	5	11	18.6	281.3	40			61	1	150	5.08
1.53	1	25	8	114.6	245	100	0	2	138	3.64			1.6	1	5	11	18.6	281.3	20			99	1	150	7.84
1.53	1	25	8	114.6	245	120	0	2	138	2.8			1.56	1	5	11	18.6	281.3	40			99	1	150	6.03
1.32	1	25	8	70.4	235.2	20	0	3	151	1.61			1.6	1	5	11	18.6	343.3	20			23	1	150	3.55
1.49	1	25	8	70.4	235.2	60	0	3	151	2.46			1.56	1	5	11	18.6	343.3	40			23	1	150	4.19
1.51	1	25	8	70.4	235.2	100	0	3	151	3.05			1.6	1	5	11	18.6	343.3	20			46	1	150	3.44
1.51	1	25	8	70.4	235.2	120	0	3	151	2.41			1.56	1	5	11	18.6	343.3	40			46	1	150	4.08
1.33	1	5	8	105	705.6	40	0	1	121	0.834099			1.6	1	5	11	18.6	343.3	20			61	1	150	3.15
1.33	1	10	8	105	499.8	40	0	1	121	0.870739			1.56	1	5	11	18.6	343.3	40			61	1	150	4.24
1.33	1	15	8	105	333.2	40	0	1	121	2.44934			1.6	1	5	11	18.6	343.3	20			99	1	150	6.67
1.33	1	20	8	105	313.6	40	0	1	121	2.83712			1.56	1	5	11	18.6	343.3	40			99	1	150	5.15
1.33	1	25	8	105	294	40	0	1	121	2.87071			1.6	1	5	11	18.6	405.4	20			23	1	150	2.61
1.45	1	5	8	105	705.6	80	0	1	121	1.18524			1.56	1	5	11	18.6	405.4	40			23	1	150	3.4
1.45	1	10	8	105	499.8	80	0	1	121	1.32569			1.6	1	5	11	18.6	405.4	20			46	1	150	2.5
1.45	1	15	8	105	333.2	80	0	1	121	3.92412			1.56	1	5	11	18.6	405.4	40			46	1	150	3.1
1.45	1	20	8	105	313.6	80	0	1	121	3.83863			1.6	1	5	11	18.6	405.4	20			61	1	150	2.67
1.45	1	25	8	105	294	80	0	1	121	4.03099			1.56	1	5	11	18.6	405.4	40			61	1	150	3.58
1.56	1	5	8	105	705.6	120	0	1	121	2.20942			1.6	1	5	11	18.6	405.4	20			99	1	150	5.87
1.56	1	10	8	105	499.8	120	0	1	121	2.66761			1.56	1	5	11	18.6	405.4	40			99	1	150	4.64
1.56	1	15	8	105	333.2	120	0	1	121	3.72852			1.6	1	5	11	22.8	196.18	20			23	2	150	5.4
1.56	1	20	8	105	313.6	120	0	1	121	4.10061			1.56	1	5	11	22.8	196.18	40			23	2	150	5.07
1.56	1	25	8	105	294	120	0	1	121	3.83615			1.6	1	5	11	22.8	196.18	20			46	2	150	4.67
1.33	1	5	8	105	676.2	40	0	2	121	0.800512			1.56	1	5	11	22.8	196.18	40			46	2	150	4.28
1.33	1	10	8	105	499.8	40	0	2	121	0.834099			1.6	1	5	11	22.8	196.18	20			61	2	150	4.61
1.33	1	15	8	105	411.6	40	0	2	121	1.81729			1.56	1	5	11	22.8	196.18	40			61	2	150	4.41
1.33	1	20	8	105	401.8	40	0	2	121	2.44934			1.6	1	5	11	22.8	196.18	20			99	2	150	7.75
1.33	1	25	8	105	284.2	40	0	2	121	2.51957			1.56	1	5	11	22.8	196.18	40			99	2	150	5.85
1.45	1	5	8	105	667.2	80	0	2	121	1.09669			1.6	1	5	11	22.8	256.6	20			23	2	150	4.73
1.45	1	10	8	105	581	80	0	2	121	1.41424			1.56	1	5	11	22.8	256.6	40			23	2	150	4.01
1.45	1	15	8	105	402.6	80	0	2	121	2.90735			1.6	1	5	11	22.8	256.6	20			46	2	150	4.3
1.45	1	20	8	105	314.4	80	0	2	121	3.43253			1.56	1	5	11	22.8	256.6	40			46	2	150	5.18
1.45	1	25	8	105	275.2	80	0	2	121	3.83863			1.6	1	5	11	22.8	256.6	20			61	2	150	4.42
1.56	1	5	8	105	667.2	120	0	2	121	1.28996			1.56	1	5	11	22.8	256.6	40			61	2	150	4.81
1.56	1	10	8	105	581	120	0	2	121	2.87979			1.6	1	5	11	22.8	256.6	20			99	2	150	6.87
1.56	1	15	8	105	402.6	120	0	2	121	3.97761			1.56	1	5	11	22.8	256.6	40			99	2	150	5.14
1.56	1	20	8	105	314.4	120	0	2	121	3.99606			1.6	1	5	11	22.8	317	20			23	2	150	3.91
1.56	1	25	8	105	275.2	120	0	2	121	4.01143			1.56	1	5	11	22.8	317	40			23	2	150	3.91
1.33	1	5	8	105	676.2	40	0	3	121	0.48296			1.6	1	5	11	22.8	317	20			46	2	150	3.54
1.33	1	10	8	105	499.8	40	0	3	121	0.782191			1.56	1	5	11	22.8	317	40			46	2	150	4.77
1.33	1	15	8	105	411.6	40	0	3	121	1.46615			1.6	1	5	11	22.8	317	20			61	2	150	3.38
1.33	1	20	8	105	401.8	40	0	3	121	1.95774			1.56	1	5	11	22.8	317	40			61	2	150	4.45
1.33	1	25	8	105	284.2	40	0	3	121	2.07988			1.6	1	5	11	22.8	317	20			99	2	150	6.18
1.45	1	5	8	105	667.2	80	0	3	121	0.922647			1.56	1	5	11	22.8	317	40			99	2	150	4.33
1.45	1	10	8	105	581	80	0	3	121	1.76538			1.6	1	5	11	22.8	377.4	20			23	2	150	3.6
1.45	1	15	8	105	402.6	80	0	3	121	2.30888			1.56	1	5	11	22.8	377.4	40			23	2	150	3.62
1.45	1	20	8	105	314.4	80	0	3	121	2.97757			1.6	1	5	11	22.8	377.4	20			46	2	150	3.54
1.45	1	25	8	105	275.2	80	0	3	121	2.74857			1.56	1	5	11	22.8	377.4	40			46	2	150	3.45
1.56	1	5	8	105	667.2	120	0	3	121	1.37606			1.6	1	5	11	22.8	377.4	20			61	2	150	3.39
1.56	1	10	8	105	581	120	0	3	121	2.75679			1.56	1	5	11	22.8	377.4	40			61	2	150	4.02
1.56	1	15	8	105	402.6	120	0	3	121	3.30416			1.6	1	5	11	22.8	377.4	20			99	2	150	5.64
1.56	1	20	8	105	314.4	120	0	3	121	4.17134			1.56	1	5	11	22.8	377.4	40			99	2	150	4.69
1.56	1	25	8	105	275.2	120	0	3	121	3.44561	Days after irrigation	Shan 2021	1.56	1	5	11	148	760.5	5			0	6	150	5.49912
1.56	1	5	10.5	58	750	10	0	1	3	2.84	3		1.56	1	5	11	148	760.5	15			0	6	150	4.30163
1.56	1	5	10.5	58	750	10	5	1	3	3			1.56	1	5	11	148	760.5	25			0	6	150	4.53133
1.56	1	5	10.5	58	750	10	10	1	3	3.2			1.56	1	5	11	148	760.5	35			0	6	150	3.72279
1.56	1	5	10.5	58	750	10	15	1	3	3.4			1.56	1	5	11	148	760.5	50			0	6	150	3.2297
1.56	1	5	10.5	58	750	10	20	1	3	3.6			1.56	1	5	11	148	760.5	80			0	6	150	2.78868
1.56	1	5	10.5	58	750	10	25	1	3	4.2			1.34	0.3	5	7.2	180	317	5			0	1	1	6.527
1.56	1	5	10.5	58	750	10	30	1	3	4.4			1.46	0.3	5	7.2	180	317	20			0	1	1	5.5555
1.56	1	5	10.5	58	750	15	0	1	3	3			1.46	0.3	5	7.2	180	317	40			0	1	1	4.5841
1.56	1	5	10.5	58	750	15	5	1	3	3.6			1.47	0.3	5	7.2	180	317	60			0	1	1	4.0338
1.56	1	5	10.5	58	750	15	10	1	3	3.8			1.48	0.3	5	7.2	180	317	80			0	1	1	4.2965
1.56	1	5	10.5	58	750	15	15	1	3	4			1.51	0.3	5	7.2	180	317	100			0	1	1	3.9734
1.56	1	5	10.5	58	750	15	20	1	3	4.4			1.52	0.3	5	7.2	180	317	120			0	1	1	4.2131
1.56	1	5	10.5	58	750	15	25	1	3	5			1.54	0.3	5	7.2	180	317	140			0	1	1	3.9254
1.56	1	5	10.5	58	750	15	30	1	3	5.2			1.34	0.3	5	7.2	180	317	5			0	1	31	8.1446
1.56	1	5	10.5	58	750	20	0	1	3	3.2			1.46	0.3	5	7.2	180	317	20			0	1	31	6.6229
1.56	1	5	10.5	58	750	20	5	1	3	3.8			1.46	0.3	5	7.2	180	317	40			0	1	31	5.8307
1.56	1	5	10.5	58	750	20	10	1	3	4			1.47	0.3	5	7.2	180	317	60			0	1	31	5.5326
1.56	1	5	10.5	58	750	20	15	1	3	4.4			1.48	0.3	5	7.2	180	317	80			0	1	31	4.8489
1.56	1	5	10.5	58	750	20	20	1	3	4.8			1.51	0.3	5	7.2	180	317	100			0	1	31	4.5258
1.56	1	5	10.5	58	750	20	25	1	3	5.4			1.52	0.3	5	7.2	180	317	120			0	1	31	4.4299
1.56	1	5	10.5	58	750	20	30	1	3	6			1.54	0.3	5	7.2	180	317	140			0	1	31	3.7211
1.56	1	5	10.5	58	750	25	0	1	3	3.6			1.34	0.3	5	7.2	180	317	5			0	1	58	6.1663
1.56	1	5	10.5	58	750	25	5	1	3	3.92			1.46	0.3	5	7.2	180	317	20			0	1	58	5.6285
1.56	1	5	10.5	58	750	25	10	1	3	4.88			1.46	0.3	5	7.2	180	317	40			0	1	58	5.1595
1.56	1	5	10.5	58	750	25	15	1	3	4.8			1.47	0.3	5	7.2	180	317	60			0	1	58	5.5201
1.56	1	5	10.5	58	750	25	20	1	3	5.2			1.48	0.3	5	7.2	180	317	80			0	1	58	5.3513
1.56	1	5	10.5	58	750	25	25	1	3	5.4			1.51	0.3	5	7.2	180	317	100			0	1	58	5.3408
1.56	1	5	10.5	58	750	25	30	1	3	5.8			1.52	0.3	5	7.2	180	317	120			0	1	58	4.728
1.56	1	5	10.5	58	750	30	0	1	3	4			1.54	0.3	5	7.2	180	317	140			0	1	58	4.3215
1.56	1	5	10.5	58	750	30	5	1	3	4.2			1.54	0.3	5	11	141.8	850	5			0	15	0	10.4307
1.56	1	5	10.5	58	750	30	10	1	3	4.4			1.54	0.3	5	11	141.8	850	5			0	15	30	6.6506
1.56	1	5	10.5	58	750	30	15	1	3	4.8			1.54	0.3	5	11	141.8	850	5			0	15	60	3.2454
1.56	1	5	10.5	58	750	30	20	1	3	5.2			1.54	0.3	5	11	141.8	850	5			0	15	90	3.9639
1.56	1	5	10.5	58	750	30	25	1	3	5.6			1.54	0.3	5	11	141.8	850	5			0	15	120	8.9936
1.56	1	5	10.5	58	750	30	30	1	3	6			1.54	0.3	5	11	141.8	850	5			0	15	150	0.4493
1.56	1	5	10.5	58	750	40	0	1	3	4.8			1.54	0.3	5	11	141.8	850	5			0	15	180	2.1676
1.56	1	5	10.5	58	750	40	5	1	3	5			1.54	0.3	5	11	141.8	850	5			0	15	210	1.449
1.56	1	5	10.5	58	750	40	10	1	3	5.2			1.54	0.3	5	11	141.8	850	5			0	15	240	1.449
1.56	1	5	10.5	58	750	40	15	1	3	5.4			1.54	0.3	5	11	141.8	850	5			0	15	270	0.9023
1.56	1	5	10.5	58	750	40	20	1	3	5.6			1.54	0.3	5	11	141.8	850	5			0	15	300	2.7924
1.56	1	5	10.5	58	750	40	25	1	3	5.8			1.54	0.3	5	11	141.8	850	5			0	15	330	1.1679
1.56	1	5	10.5	58	750	40	30	1	3	6.2			1.54	0.3	5	11	141.8	850	5			0	15	360	1.1679
1.56	1	5	10.5	58	750	10	0	2	3	2.84			1.54	0.3	5	11	141.8	850	20			0	15	0	5.4791
1.56	1	5	10.5	58	750	10	5	2	3	3.4			1.54	0.3	5	11	141.8	850	20			0	15	30	4.495
1.56	1	5	10.5	58	750	10	10	2	3	3.4			1.54	0.3	5	11	141.8	850	20			0	15	60	4.7605
1.56	1	5	10.5	58	750	10	15	2	3	3.4			1.54	0.3	5	11	141.8	850	20			0	15	90	2.1676
1.56	1	5	10.5	58	750	10	20	2	3	4			1.54	0.3	5	11	141.8	850	20			0	15	120	4.7605
1.56	1	5	10.5	58	750	10	25	2	3	4.2			1.54	0.3	5	11	141.8	850	20			0	15	150	1.7146
1.56	1	5	10.5	58	750	10	30	2	3	4.4			1.54	0.3	5	11	141.8	850	20			0	15	180	2.4331
1.56	1	5	10.5	58	750	15	0	2	3	3.6			1.54	0.3	5	11	141.8	850	20			0	15	210	2.1676
1.56	1	5	10.5	58	750	15	5	2	3	3.8			1.54	0.3	5	11	141.8	850	20			0	15	240	3.1517
1.56	1	5	10.5	58	750	15	10	2	3	4			1.54	0.3	5	11	141.8	850	20			0	15	270	2.7924
1.56	1	5	10.5	58	750	15	15	2	3	4.2			1.54	0.3	5	11	141.8	850	20			0	15	300	1.5271
1.56	1	5	10.5	58	750	15	20	2	3	4.4			1.54	0.3	5	11	141.8	850	20			0	15	330	1.0898
1.56	1	5	10.5	58	750	15	25	2	3	5			1.54	0.3	5	11	141.8	850	20			0	15	360	0.9023
1.56	1	5	10.5	58	750	15	30	2	3	5.2			1.54	0.3	5	11	141.8	850	40			0	15	0	8.8062
1.56	1	5	10.5	58	750	20	0	2	3	3.6			1.54	0.3	5	11	141.8	850	40			0	15	30	6.0258
1.56	1	5	10.5	58	750	20	5	2	3	3.8			1.54	0.3	5	11	141.8	850	40			0	15	60	8.3532
1.56	1	5	10.5	58	750	20	10	2	3	4			1.54	0.3	5	11	141.8	850	40			0	15	90	4.5887
1.56	1	5	10.5	58	750	20	15	2	3	4.2			1.54	0.3	5	11	141.8	850	40			0	15	120	9.3529
1.56	1	5	10.5	58	750	20	20	2	3	4.4			1.54	0.3	5	11	141.8	850	40			0	15	150	9.1655
1.56	1	5	10.5	58	750	20	25	2	3	4.6			1.54	0.3	5	11	141.8	850	40			0	15	180	1.449
1.56	1	5	10.5	58	750	20	30	2	3	5			1.54	0.3	5	11	141.8	850	40			0	15	210	1.2616
1.56	1	5	10.5	58	750	25	0	2	3	4.2			1.54	0.3	5	11	141.8	850	40			0	15	240	1.449
1.56	1	5	10.5	58	750	25	5	2	3	4.2			1.54	0.3	5	11	141.8	850	40			0	15	270	1.1679
1.56	1	5	10.5	58	750	25	10	2	3	4.48			1.54	0.3	5	11	141.8	850	40			0	15	300	1.5271
1.56	1	5	10.5	58	750	25	15	2	3	4.4			1.54	0.3	5	11	141.8	850	40			0	15	330	1.3553
1.56	1	5	10.5	58	750	25	20	2	3	4.6			1.54	0.3	5	11	141.8	850	40			0	15	360	1.3553
1.56	1	5	10.5	58	750	25	25	2	3	5			1.54	0.3	5	11	141.8	850	60			0	15	0	7.4629
1.56	1	5	10.5	58	750	25	30	2	3	5.2			1.54	0.3	5	11	141.8	850	60			0	15	30	7.4629
1.56	1	5	10.5	58	750	30	0	2	3	4.4			1.54	0.3	5	11	141.8	850	60			0	15	60	9.0717
1.56	1	5	10.5	58	750	30	5	2	3	4.4			1.54	0.3	5	11	141.8	850	60			0	15	90	3.1517
1.56	1	5	10.5	58	750	30	10	2	3	4.6			1.54	0.3	5	11	141.8	850	60			0	15	120	4.8543
1.56	1	5	10.5	58	750	30	15	2	3	4.8			1.54	0.3	5	11	141.8	850	60			0	15	150	3.5109
1.56	1	5	10.5	58	750	30	20	2	3	5.2			1.54	0.3	5	11	141.8	850	60			0	15	180	2.5268
1.56	1	5	10.5	58	750	30	25	2	3	5.2			1.54	0.3	5	11	141.8	850	60			0	15	210	0.7305
1.56	1	5	10.5	58	750	30	30	2	3	5.4			1.54	0.3	5	11	141.8	850	60			0	15	240	5.8383
1.56	1	5	10.5	58	750	35	0	2	3	4.8			1.54	0.3	5	11	141.8	850	60			0	15	270	2.7924
1.56	1	5	10.5	58	750	35	5	2	3	4.8			1.54	0.3	5	11	141.8	850	60			0	15	300	7.4629
1.56	1	5	10.5	58	750	35	10	2	3	5			1.54	0.3	5	11	141.8	850	60			0	15	330	2.3394
1.56	1	5	10.5	58	750	35	15	2	3	5.2			1.54	0.3	5	11	141.8	850	60			0	15	360	1.7146
1.56	1	5	10.5	58	750	35	20	2	3	5.2			1.54	0.3	5	11	141.8	850	90			0	15	0	5.401
1.56	1	5	10.5	58	750	35	25	2	3	5.4			1.54	0.3	5	11	141.8	850	90			0	15	30	5.4791
1.56	1	5	10.5	58	750	35	30	2	3	5.4			1.54	0.3	5	11	141.8	850	90			0	15	60	8.3532
1.56	1	5	10.5	58	750	40	0	2	3	5			1.54	0.3	5	11	141.8	850	90			0	15	90	3.5109
1.56	1	5	10.5	58	750	40	5	2	3	5			1.54	0.3	5	11	141.8	850	90			0	15	120	5.401
1.56	1	5	10.5	58	750	40	10	2	3	5			1.54	0.3	5	11	141.8	850	90			0	15	150	4.4013
1.56	1	5	10.5	58	750	40	15	2	3	5.2			1.54	0.3	5	11	141.8	850	90			0	15	180	3.6046
1.56	1	5	10.5	58	750	40	20	2	3	5.3			1.54	0.3	5	11	141.8	850	90			0	15	210	0.9023
1.56	1	5	10.5	58	750	40	25	2	3	5.4			1.54	0.3	5	11	141.8	850	90			0	15	240	10.9618
1.56	1	5	10.5	58	750	40	30	2	3	5.4			1.54	0.3	5	11	141.8	850	90			0	15	270	8.6344
1.51	1	5	7.9	125	479.8	20	0	1	0	0.335			1.54	0.3	5	11	141.8	850	90			0	15	300	11.0555
1.51	1	5	7.9	125	479.8	40	0	1	0	0.39516			1.54	0.3	5	11	141.8	850	90			0	15	330	6.0258
1.51	1	5	7.9	125	479.8	60	0	1	0	0.42307			1.54	0.3	5	11	141.8	850	90			0	15	360	5.4791
1.51	1	5	7.9	125	479.8	80	0	1	0	0.43051			1.54	0.3	5	11	141.8	850	120			0	15	0	9.0717
1.51	1	5	7.9	125	479.8	100	0	1	0	0.6854			1.54	0.3	5	11	141.8	850	120			0	15	30	8.7125
1.51	1	5	8.7	207.7	479.8	20	0	2	0	0.91936			1.54	0.3	5	11	141.8	850	120			0	15	60	10.2433
1.51	1	5	8.7	207.7	479.8	40	0	2	0	0.7366			1.54	0.3	5	11	141.8	850	120			0	15	90	3.2454
1.51	1	5	8.7	207.7	479.8	60	0	2	0	0.64584			1.54	0.3	5	11	141.8	850	120			0	15	120	5.2135
1.51	1	5	8.7	207.7	479.8	80	0	2	0	0.72487			1.54	0.3	5	11	141.8	850	120			0	15	150	5.8383
1.51	1	5	8.7	207.7	479.8	100	0	2	0	1.21263			1.54	0.3	5	11	141.8	850	120			0	15	180	3.6046
1.31	1	5	20.4	467.5	441.25	30	0	1	120	8.26321			1.54	0.3	5	11	141.8	850	120			0	15	210	0.9961
1.31	1	5	20.4	467.5	353	30	0	1	120	10.4344			1.54	0.3	5	11	141.8	850	120			0	15	240	6.1195
1.31	1	5	20.4	467.5	426	30	0	1	120	11.3993			1.54	0.3	5	11	141.8	850	120			0	15	270	8.0877
1.31	1	5	20.4	467.5	499	30	0	1	120	9.74081			1.54	0.3	5	11	141.8	850	120			0	15	300	7.5566
1.31	1	5	20.4	467.5	573	30	0	1	120	10.5248			1.54	0.3	5	11	141.8	850	120			0	15	330	7.8221
1.31	1	5	20.4	483.5	441.25	60	0	2	120	7.43618			1.54	0.3	5	11	141.8	850	120			0	15	360	6.6506
1.31	1	5	20.4	483.5	353	60	0	2	120	12.9335			1.54	0.3	5	11	141.8	850	150			0	15	0	9.884
1.31	1	5	20.4	483.5	426	60	0	2	120	11.5812			1.54	0.3	5	11	141.8	850	150			0	15	30	8.4469
1.31	1	5	20.4	483.5	499	60	0	2	120	13.6096			1.54	0.3	5	11	141.8	850	150			0	15	60	9.6185
1.31	1	5	20.4	483.5	573	60	0	2	120	15.3			1.54	0.3	5	11	141.8	850	150			0	15	90	3.4172
1.33	1	5	8	136	450	10	0	1	138	0.18324			1.54	0.3	5	11	141.8	850	150			0	15	120	7.1973
1.33	1	5	8	136	450	30	0	1	138	0.17211			1.54	0.3	5	11	141.8	850	150			0	15	150	4.5887
1.33	1	5	8	136	450	50	0	1	138	0.17128			1.54	0.3	5	11	141.8	850	150			0	15	180	4.6824
1.33	1	5	8	136	450	70	0	1	138	0.23681			1.54	0.3	5	11	141.8	850	150			0	15	210	0.8086
1.33	1	5	8	136	450	90	0	1	138	0.26689			1.54	0.3	5	11	141.8	850	150			0	15	240	7.1973
1.33	1	5	8	82	510	10	0	2	138	0.16263			1.54	0.3	5	11	141.8	850	150			0	15	270	7.1036
1.33	1	5	8	82	510	30	0	2	138	0.17609			1.54	0.3	5	11	141.8	850	150			0	15	300	5.3073
1.33	1	5	8	82	510	50	0	2	138	0.1934			1.54	0.3	5	11	141.8	850	150			0	15	330	6.5569
1.33	1	5	8	82	510	70	0	2	138	0.25892			1.54	0.3	5	11	141.8	850	150			0	15	360	5.5728
1.33	1	5	8	82	510	90	0	2	138	0.25741			1.54	0.3	5	11	141.8	850	20			0	12	0	1.8424
1.33	1	5	8	56	400	10	0	1	160	3.13266			1.54	0.3	5	11	141.8	850	20			0	12	30	1.5406
1.33	1	5	8	56	400	20	0	1	160	2.90544			1.54	0.3	5	11	141.8	850	20			0	12	60	2.2508
1.33	1	5	8	56	400	30	0	1	160	3.09894			1.54	0.3	5	11	141.8	850	20			0	12	90	1.8424
1.33	1	5	8	56	400	40	0	1	160	2.95528			1.54	0.3	5	11	141.8	850	20			0	12	120	1.1322
1.33	1	5	8	56	400	50	0	1	160	2.96408			1.54	0.3	5	11	141.8	850	20			0	12	150	0.8304
1.33	1	5	8	56	400	60	0	1	160	2.37331			1.54	0.3	5	11	141.8	850	20			0	12	180	1.0257
1.47	1	5	8	18.1	45	20	0	1	76	9.74282			1.54	0.3	5	11	141.8	850	20			0	12	210	2.2508
1.47	1	5	8	18.1	45	40	0	1	76	9.91586			1.54	0.3	5	11	141.8	850	20			0	12	240	1.0257
1.47	1	5	8	18.1	45	60	0	1	76	14.8043			1.54	0.3	5	11	141.8	850	20			0	12	270	1.3275
1.47	1	5	8	18.1	45	80	0	1	76	13.968			1.54	0.3	5	11	141.8	850	20			0	12	300	0.6173
1.47	1	5	8	18.1	45	100	0	1	76	13.2325			1.54	0.3	5	11	141.8	850	20			0	12	330	1.1322
1.47	1	5	8	18.1	135	20	0	1	76	6.79417			1.54	0.3	5	11	141.8	850	20			0	12	360	0.9191
1.47	1	5	8	18.1	135	40	0	1	76	7.12223			1.54	0.3	5	11	141.8	850	40			0	12	0	1.434
1.47	1	5	8	18.1	135	60	0	1	76	7.86394			1.54	0.3	5	11	141.8	850	40			0	12	30	1.2387
1.47	1	5	8	18.1	135	80	0	1	76	11.4726			1.54	0.3	5	11	141.8	850	40			0	12	60	1.5406
1.47	1	5	8	18.1	135	100	0	1	76	11.4726			1.54	0.3	5	11	141.8	850	40			0	12	90	1.3275
1.47	1	5	8	18.1	225	20	0	1	76	4.54867			1.54	0.3	5	11	141.8	850	40			0	12	120	0.8304
1.47	1	5	8	18.1	225	40	0	1	76	5.20838			1.54	0.3	5	11	141.8	850	40			0	12	150	0.6173
1.47	1	5	8	18.1	225	60	0	1	76	9.82635			1.54	0.3	5	11	141.8	850	40			0	12	180	1.1322
1.47	1	5	8	18.1	225	80	0	1	76	6.61385			1.54	0.3	5	11	141.8	850	40			0	12	210	1.8424
1.47	1	5	8	18.1	225	100	0	1	76	11.6477			1.54	0.3	5	11	141.8	850	40			0	12	240	0.7238
1.47	1	5	8	18.1	315	20	0	1	76	3.26809			1.54	0.3	5	11	141.8	850	40			0	12	270	0.6173
1.47	1	5	8	18.1	315	40	0	1	76	3.35461			1.54	0.3	5	11	141.8	850	40			0	12	300	0.7238
1.47	1	5	8	18.1	315	60	0	1	76	4.76781			1.54	0.3	5	11	141.8	850	40			0	12	330	1.2387
1.47	1	5	8	18.1	315	80	0	1	76	8.32962			1.54	0.3	5	11	141.8	850	40			0	12	360	1.1322
1.47	1	5	8	18.1	315	100	0	1	76	9.25252			1.54	0.3	5	11	141.8	850	60			0	12	0	1.3275
1.47	1	5	8	18.1	405	20	0	1	76	2.6777			1.54	0.3	5	11	141.8	850	60			0	12	30	1.3275
1.47	1	5	8	18.1	405	40	0	1	76	3.0936			1.54	0.3	5	11	141.8	850	60			0	12	60	1.1322
1.47	1	5	8	18.1	405	60	0	1	76	5.90454			1.54	0.3	5	11	141.8	850	60			0	12	90	1.0257
1.47	1	5	8	18.1	405	80	0	1	76	6.63596			1.54	0.3	5	11	141.8	850	60			0	12	120	0.5108
1.47	1	5	8	18.1	405	100	0	1	76	6.72201			1.54	0.3	5	11	141.8	850	60			0	12	150	0.422
1.47	1	5	8	18.1	495	20	0	1	76	2.42179			1.54	0.3	5	11	141.8	850	60			0	12	180	0.5108
1.47	1	5	8	18.1	495	40	0	1	76	3.07791			1.54	0.3	5	11	141.8	850	60			0	12	210	1.8424
1.47	1	5	8	18.1	495	60	0	1	76	3.40597			1.54	0.3	5	11	141.8	850	60			0	12	240	0.8304
1.47	1	5	8	18.1	495	80	0	1	76	3.73404			1.54	0.3	5	11	141.8	850	60			0	12	270	0.8304
1.47	1	5	8	18.1	495	100	0	1	76	5.54551			1.54	0.3	5	11	141.8	850	60			0	12	300	0.9191
1.25	1	5	7	210.6	400	5	0	1	0	2.12252			1.54	0.3	5	11	141.8	850	60			0	12	330	1.8424
1.27	1	5	7	210.6	400	10	0	1	0	6.756			1.54	0.3	5	11	141.8	850	60			0	12	360	2.3573
1.45	1	5	7	210.6	400	30	0	1	0	7.46666			1.54	0.3	5	11	141.8	850	90			0	12	0	3.1741
1.53	1	5	7	210.6	400	50	0	1	0	7.7983			1.54	0.3	5	11	141.8	850	90			0	12	30	3.4759
1.57	1	5	7	210.6	400	80	0	1	0	7.52351			1.54	0.3	5	11	141.8	850	90			0	12	60	4.5945
1.25	1	5	7	210.6	400	5	45	2	0	8.27864			1.54	0.3	5	11	141.8	850	90			0	12	90	3.689
1.27	1	5	7	210.6	400	10	45	2	0	8.49821			1.54	0.3	5	11	141.8	850	90			0	12	120	2.3573
1.45	1	5	7	210.6	400	30	45	2	0	8.8228			1.54	0.3	5	11	141.8	850	90			0	12	150	1.1322
1.53	1	5	7	210.6	400	50	45	2	0	7.34307			1.54	0.3	5	11	141.8	850	90			0	12	180	0.9191
1.57	1	5	7	210.6	400	80	45	2	0	5.6915			1.54	0.3	5	11	141.8	850	90			0	12	210	2.1443
1.33	1	5	11.3	46	643	20	0	1	135	2.86099			1.54	0.3	5	11	141.8	850	90			0	12	240	0.7238
1.49	1	5	11.3	46	643	40	0	1	135	3.32696			1.54	0.3	5	11	141.8	850	90			0	12	270	1.0257
1.55	1	5	11.3	46	643	60	0	1	135	4.13316			1.54	0.3	5	11	141.8	850	90			0	12	300	0.5108
1.53	1	5	11.3	46	643	80	0	1	135	4.90238			1.54	0.3	5	11	141.8	850	90			0	12	330	10.8267
1.53	1	5	11.3	46	643	100	0	1	135	5.16125			1.54	0.3	5	11	141.8	850	90			0	12	360	7.9681
1.58	1	5	11.3	46	603	20	0	2	135	2.26189			1.54	0.3	5	11	141.8	850	120			0	12	0	6.4411
1.53	1	5	11.3	46	603	40	0	2	135	3.88169			1.54	0.3	5	11	141.8	850	120			0	12	30	5.6243
1.56	1	5	11.3	46	603	60	0	2	135	4.73227			1.54	0.3	5	11	141.8	850	120			0	12	60	9.7081
1.55	1	5	11.3	46	603	80	0	2	135	4.68789			1.54	0.3	5	11	141.8	850	120			0	12	90	6.7429
1.53	1	5	11.3	46	603	100	0	2	135	5.24261			1.54	0.3	5	11	141.8	850	120			0	12	120	2.6592
1.53	1	5	11.3	53.3	572	10	0	1	135	0.16827			1.54	0.3	5	11	141.8	850	120			0	12	150	1.7359
1.53	1	5	11.3	53.3	572	20	0	1	135	0.13115			1.54	0.3	5	11	141.8	850	120			0	12	180	4.1861
1.53	1	5	11.3	53.3	572	30	0	1	135	0.14971			1.54	0.3	5	11	141.8	850	120			0	12	210	5.216
1.53	1	5	11.3	53.3	572	40	0	1	135	0.14971			1.54	0.3	5	11	141.8	850	120			0	12	240	8.5895
1.53	1	5	11.3	53.3	572	50	0	1	135	0.13115			1.54	0.3	5	11	141.8	850	120			0	12	270	6.0327
1.53	1	5	11.3	53.3	572	60	0	1	135	0.36318			1.54	0.3	5	11	141.8	850	120			0	12	300	3.0675
1.53	1	5	11.3	53.3	572	80	0	1	135	0.32915			1.54	0.3	5	11	141.8	850	120			0	12	330	3.5825
1.53	1	5	11.3	53.3	572	100	0	1	135	0.32915			1.54	0.3	5	11	141.8	850	120			0	12	360	5.9262
1.42	1	10	17.7875	70.8	523	40	0	1	150	2.8098			1.54	0.3	5	11	141.8	850	150			0	12	0	3.3694
1.42	1	20	17.7875	70.8	491.5	40	0	1	150	2.43408			1.54	0.3	5	11	141.8	850	150			0	12	30	1.8424
1.42	1	30	17.7875	70.8	481	40	0	1	150	1.11999			1.54	0.3	5	11	141.8	850	150			0	12	60	3.4759
1.42	1	40	17.7875	70.8	428.5	40	0	1	150	3.00946			1.54	0.3	5	11	141.8	850	150			0	12	90	2.5526
1.42	1	50	17.7875	70.8	418	40	0	1	150	2.52847			1.54	0.3	5	11	141.8	850	150			0	12	120	1.1322
1.42	1	10	16.4	81.2	723.8	40	0	2	150	2.45587			1.54	0.3	5	11	141.8	850	150			0	12	150	1.0257
1.42	1	20	16.4	81.2	601.6	40	0	2	150	3.83349			1.54	0.3	5	11	141.8	850	150			0	12	180	1.434
1.42	1	30	16.4	81.2	592.2	40	0	2	150	3.3525			1.54	0.3	5	11	141.8	850	150			0	12	210	2.1443
1.42	1	40	16.4	81.2	517	40	0	2	150	2.61196			1.54	0.3	5	11	141.8	850	150			0	12	240	0.9191
1.42	1	50	16.4	81.2	507.6	40	0	2	150	4.45968			1.54	0.3	5	11	141.8	850	150			0	12	270	1.1322
1.42	1	10	19.1857	114.6	647	40	0	3	150	3.44688			1.54	0.3	5	11	141.8	850	150			0	12	300	0.7238
1.42	1	20	19.1857	114.6	597.8	40	0	3	150	3.54126			1.54	0.3	5	11	141.8	850	150			0	12	330	1.8424
1.42	1	30	19.1857	114.6	450.8	40	0	3	150	5.02416			1.54	0.3	5	11	141.8	850	150			0	12	360	3.3694
1.42	1	40	19.1857	114.6	443	40	0	3	150	4.2092			1.54	0.3	5	11	141.8	850	5			0	10	0	7.5392
1.42	1	50	19.1857	114.6	411.6	40	0	3	150	3.67739			1.54	0.3	5	11	141.8	850	5			0	10	30	7.6861
1.53	1	5	11.3	45.7	297	20	0	1	0	9.13			1.54	0.3	5	11	141.8	850	5			0	10	60	11.7407
1.53	1	5	11.3	45.7	297	40	0	1	0	8.21			1.54	0.3	5	11	141.8	850	5			0	10	90	5.5119
1.53	1	5	11.3	45.7	297	60	0	1	0	9.55			1.54	0.3	5	11	141.8	850	5			0	10	120	4.3073
1.53	1	5	11.3	45.7	297	80	0	1	0	10.38			1.54	0.3	5	11	141.8	850	5			0	10	150	1.9568
1.53	1	5	11.3	45.7	297	100	0	1	0	10.19			1.54	0.3	5	11	141.8	850	5			0	10	180	0.7522
1.53	1	5	11.3	45.7	333	20	0	2	0	8.56			1.54	0.3	5	11	141.8	850	5			0	10	210	1.4279
1.53	1	5	11.3	45.7	333	40	0	2	0	10.67			1.54	0.3	5	11	141.8	850	5			0	10	240	0.7522
1.53	1	5	11.3	45.7	333	60	0	2	0	11.69			1.54	0.3	5	11	141.8	850	5			0	10	270	0.7522
1.53	1	5	11.3	45.7	333	80	0	2	0	11.44			1.54	0.3	5	11	141.8	850	5			0	10	300	0.6052
1.53	1	5	11.3	45.7	333	100	0	2	0	9.84			1.54	0.3	5	11	141.8	850	5			0	10	330	2.1037
1.6	1	5	6.8	22.6	279.2	20	0	1	0	1.7			1.54	0.3	5	11	141.8	850	5			0	10	360	2.4563
1.6	1	5	6.8	22.6	279.2	40	0	1	0	1.8			1.54	0.3	5	11	141.8	850	20			0	10	0	7.1866
1.6	1	5	6.8	22.6	279.2	60	0	1	0	2			1.54	0.3	5	11	141.8	850	20			0	10	30	6.1876
1.6	1	5	6.8	69.8	280	20	0	2	0	1.9			1.54	0.3	5	11	141.8	850	20			0	10	60	8.7144
1.6	1	5	6.8	69.8	280	40	0	2	0	1.9			1.54	0.3	5	11	141.8	850	20			0	10	90	4.131
1.6	1	5	6.8	69.8	280	60	0	2	0	2			1.54	0.3	5	11	141.8	850	20			0	10	120	3.9841
1.51	1	5	12.8	453.547	32.6021	5	0	1	180	0.18683			1.54	0.3	5	11	141.8	850	20			0	10	150	2.28
1.51	1	5	12.8	453.547	32.6021	30	0	1	180	0.31151			1.54	0.3	5	11	141.8	850	20			0	10	180	1.4279
1.51	1	5	12.8	453.547	32.6021	40	0	1	180	0.4117			1.54	0.3	5	11	141.8	850	20			0	10	210	1.281
1.51	1	5	12.8	453.547	32.6021	50	0	1	180	0.46517			1.54	0.3	5	11	141.8	850	20			0	10	240	1.1047
1.51	1	5	12.8	453.547	32.6021	55	0	1	180	0.57352			1.54	0.3	5	11	141.8	850	20			0	10	270	1.4279
1.51	1	5	12.8	453.547	32.6021	75	0	1	180	0.65908			1.54	0.3	5	11	141.8	850	20			0	10	300	1.281
1.51	1	5	12.8	453.547	32.6021	95	0	1	180	0.53637			1.54	0.3	5	11	141.8	850	20			0	10	330	3.8078
1.51	1	5	12.8	453.547	32.6021	130	0	1	180	0.60251			1.54	0.3	5	11	141.8	850	20			0	10	360	2.6325
1.51	1	5	12.8	453.547	32.6021	170	0	1	180	0.66414			1.54	0.3	5	11	141.8	850	40			0	10	0	10.5654
1.51	1	5	12.8	453.547	32.6021	220	0	1	180	0.60757			1.54	0.3	5	11	141.8	850	40			0	10	30	10.5654
1.51	1	5	12.8	453.547	32.6021	255	0	1	180	0.64472			1.54	0.3	5	11	141.8	850	40			0	10	60	10.5654
1.51	1	5	12.8	453.547	32.6021	280	0	1	180	0.53947			1.54	0.3	5	11	141.8	850	40			0	10	90	6.1876
1.51	1	5	12.8	453.547	32.6021	320	0	1	180	0.40213			1.54	0.3	5	11	141.8	850	40			0	10	120	6.6871
1.51	1	5	12.8	453.547	32.6021	335	0	1	180	0.29209			1.54	0.3	5	11	141.8	850	40			0	10	150	3.8078
1.51	1	5	12.8	453.547	32.6021	375	0	1	180	0.27745			1.54	0.3	5	11	141.8	850	40			0	10	180	2.4563
1.51	1	5	12.8	453.547	32.6021	400	0	1	180	0.24678			1.54	0.3	5	11	141.8	850	40			0	10	210	2.1037
1.51	1	5	12.8	453.547	32.6021	430	0	1	180	0.31151			1.54	0.3	5	11	141.8	850	40			0	10	240	2.4563
1.51	1	5	12.8	453.547	32.6021	455	0	1	180	0.30644			1.54	0.3	5	11	141.8	850	40			0	10	270	2.1037
1.51	1	5	12.8	453.547	32.6021	475	0	1	180	0.25325			1.54	0.3	5	11	141.8	850	40			0	10	300	1.9568
1.51	1	5	12.8	453.547	32.6021	485	0	1	180	0.22089			1.54	0.3	5	11	141.8	850	40			0	10	330	1.281
1.51	1	5	12.8	453.547	32.6021	515	0	1	180	0.3374			1.54	0.3	5	11	141.8	850	40			0	10	360	1.1047
1.51	1	5	12.8	453.547	32.6021	540	0	1	180	0.37624			1.54	0.3	5	11	141.8	850	60			0	10	0	13.0922
1.51	1	5	12.8	453.547	32.6021	560	0	1	180	0.3647			1.54	0.3	5	11	141.8	850	60			0	10	30	14.9726
1.51	1	5	12.8	453.547	32.6021	580	0	1	180	0.38918			1.54	0.3	5	11	141.8	850	60			0	10	60	16.1478
1.51	1	5	12.8	453.547	32.6021	615	0	1	180	0.35344			1.54	0.3	5	11	141.8	850	60			0	10	90	6.1876
1.51	1	5	12.8	453.547	32.6021	640	0	1	180	0.38918			1.54	0.3	5	11	141.8	850	60			0	10	120	9.5665
1.51	1	5	12.8	453.547	32.6021	650	0	1	180	0.36976			1.54	0.3	5	11	141.8	850	60			0	10	150	6.0114
1.59	1	5	11.5	15.6	525	5	0	1	119	0.10784			1.54	0.3	5	11	141.8	850	60			0	10	180	4.4835
1.59	1	5	11.5	15.6	525	15	0	1	119	0.18874			1.54	0.3	5	11	141.8	850	60			0	10	210	5.8351
1.59	1	5	11.5	15.6	525	25	0	1	119	0.21051			1.54	0.3	5	11	141.8	850	60			0	10	240	7.8624
1.59	1	5	11.5	15.6	525	35	0	1	119	0.2709			1.54	0.3	5	11	141.8	850	60			0	10	270	14.1205
1.59	1	5	11.5	15.6	525	45	0	1	119	0.29072			1.54	0.3	5	11	141.8	850	60			0	10	300	5.3356
1.59	1	5	11.5	15.6	525	55	0	1	119	0.25764			1.54	0.3	5	11	141.8	850	60			0	10	330	3.8078
1.59	1	5	11.5	15.6	525	65	0	1	119	0.25038			1.54	0.3	5	11	141.8	850	60			0	10	360	3.8078
1.59	1	5	11.5	15.6	525	75	0	1	119	0.23978			1.54	0.3	5	11	141.8	850	90			0	10	0	17.1468
1.59	1	5	11.5	15.6	525	85	0	1	119	0.23506			1.54	0.3	5	11	141.8	850	90			0	10	30	14.1205
1.59	1	5	11.5	15.6	525	95	0	1	119	0.19265			1.54	0.3	5	11	141.8	850	90			0	10	60	13.9442
1.59	1	5	11.5	49.4	525	5	0	2	119	0.14748			1.54	0.3	5	11	141.8	850	90			0	10	90	10.5654
1.59	1	5	11.5	49.4	525	15	0	2	119	0.16651			1.54	0.3	5	11	141.8	850	90			0	10	120	9.0376
1.59	1	5	11.5	49.4	525	25	0	2	119	0.20662			1.54	0.3	5	11	141.8	850	90			0	10	150	5.5119
1.59	1	5	11.5	49.4	525	35	0	2	119	0.20824			1.54	0.3	5	11	141.8	850	90			0	10	180	7.6861
1.59	1	5	11.5	49.4	525	45	0	2	119	0.26978			1.54	0.3	5	11	141.8	850	90			0	10	210	12.4164
1.59	1	5	11.5	49.4	525	55	0	2	119	0.26654			1.54	0.3	5	11	141.8	850	90			0	10	240	16.6473
1.59	1	5	11.5	49.4	525	65	0	2	119	0.24469			1.54	0.3	5	11	141.8	850	90			0	10	270	17.9988
1.59	1	5	11.5	49.4	525	75	0	2	119	0.24955			1.54	0.3	5	11	141.8	850	90			0	10	300	14.9726
1.59	1	5	11.5	49.4	525	85	0	2	119	0.24144			1.54	0.3	5	11	141.8	850	90			0	10	330	11.2412
1.59	1	5	11.5	49.4	525	95	0	2	119	0.25321			1.54	0.3	5	11	141.8	850	90			0	10	360	13.9442
1.38	1	5	15.16	80.15	480	0	0	1	125	3.01158			1.54	0.3	5	11	141.8	850	120			0	10	0	10.7417
1.38	1	5	15.16	80.15	480	20	0	1	125	3.53896			1.54	0.3	5	11	141.8	850	120			0	10	30	22.5529
1.38	1	5	15.16	80.15	480	40	0	1	125	3.37154			1.54	0.3	5	11	141.8	850	120			0	10	60	12.4164
1.38	1	5	15.16	80.15	480	60	0	1	125	3.15389			1.54	0.3	5	11	141.8	850	120			0	10	90	5.1593
1.38	1	5	15.16	80.15	480	80	0	1	125	2.50512			1.54	0.3	5	11	141.8	850	120			0	10	120	9.5665
1.38	1	5	15.16	80.15	480	100	0	1	125	1.70986			1.54	0.3	5	11	141.8	850	120			0	10	150	5.6588
1.38	1	5	15.16	80.15	480	120	0	1	125	1.85635			1.54	0.3	5	11	141.8	850	120			0	10	180	3.9841
1.38	1	5	15.16	80.15	480	0	0	1	125	2.87315			1.54	0.3	5	11	141.8	850	120			0	10	210	4.6598
1.38	1	5	15.16	80.15	480	20	0	1	125	3.32938			1.54	0.3	5	11	141.8	850	120			0	10	240	5.8351
1.38	1	5	15.16	80.15	480	40	0	1	125	3.13685			1.54	0.3	5	11	141.8	850	120			0	10	270	6.5108
1.38	1	5	15.16	80.15	480	60	0	1	125	3.28334			1.54	0.3	5	11	141.8	850	120			0	10	300	6.3346
1.38	1	5	15.16	80.15	480	80	0	1	125	2.48808			1.54	0.3	5	11	141.8	850	120			0	10	330	7.6861
1.38	1	5	15.16	80.15	480	100	0	1	125	1.14032			1.54	0.3	5	11	141.8	850	120			0	10	360	7.5392
1.38	1	5	15.16	80.15	480	120	0	1	125	1.23658			1.54	0.3	5	11	141.8	850	150			0	10	0	4.8067
1.33	1	5	12.2	779.4	17	0	0	1	7	0.276			1.54	0.3	5	11	141.8	850	150			0	10	30	7.5392
1.33	1	5	12.2	779.4	17	0	15	1	7	0.274			1.54	0.3	5	11	141.8	850	150			0	10	60	9.5665
1.33	1	5	12.2	779.4	17	0	30	1	7	0.242			1.54	0.3	5	11	141.8	850	150			0	10	90	5.5119
1.33	1	5	12.2	779.4	17	0	45	1	7	0.198			1.54	0.3	5	11	141.8	850	150			0	10	120	5.1593
1.33	1	5	12.2	779.4	17	10	0	1	7	0.248			1.54	0.3	5	11	141.8	850	150			0	10	150	2.9557
1.33	1	5	12.2	779.4	17	30	0	1	7	0.223			1.54	0.3	5	11	141.8	850	150			0	10	180	3.3083
1.33	1	5	12.2	779.4	17	50	0	1	7	0.268			1.54	0.3	5	11	141.8	850	150			0	10	210	3.8078
1.33	1	5	12.2	779.4	17	70	0	1	7	0.278			1.54	0.3	5	11	141.8	850	150			0	10	240	5.1593
1.33	1	5	12.2	779.4	17	90	0	1	7	0.223			1.54	0.3	5	11	141.8	850	150			0	10	270	6.5108
1.33	4	5	12.2	779.4	17	0	0	1	7	0.292			1.54	0.3	5	11	141.8	850	150			0	10	300	5.8351
1.33	4	5	12.2	779.4	17	0	15	1	7	0.264			1.54	0.3	5	11	141.8	850	150			0	10	330	5.5119
1.33	4	5	12.2	779.4	17	0	30	1	7	0.274			1.54	0.3	5	11	141.8	850	150			0	10	360	5.8351
1.33	4	5	12.2	779.4	17	0	45	1	7	0.31			1.54	0.3	5	11	141.8	850	5			0	8	0	4.1733
1.33	4	5	12.2	779.4	17	10	0	1	7	0.215			1.54	0.3	5	11	141.8	850	5			0	8	30	2.8723
1.33	4	5	12.2	779.4	17	30	0	1	7	0.243			1.54	0.3	5	11	141.8	850	5			0	8	60	2.7193
1.33	4	5	12.2	779.4	17	50	0	1	7	0.27			1.54	0.3	5	11	141.8	850	5			0	8	90	2.4132
1.33	4	5	12.2	779.4	17	70	0	1	7	0.323			1.54	0.3	5	11	141.8	850	5			0	8	120	1.6989
1.33	4	5	12.2	779.4	17	90	0	1	7	0.375			1.54	0.3	5	11	141.8	850	5			0	8	150	1.6989
1.33	6	5	12.2	779.4	17	0	0	1	7	0.456			1.54	0.3	5	11	141.8	850	5			0	8	180	1.5459
1.33	6	5	12.2	779.4	17	0	15	1	7	0.424			1.54	0.3	5	11	141.8	850	5			0	8	210	0.653
1.33	6	5	12.2	779.4	17	0	30	1	7	0.448			1.54	0.3	5	11	141.8	850	5			0	8	240	0.8061
1.33	6	5	12.2	779.4	17	0	45	1	7	0.432			1.54	0.3	5	11	141.8	850	5			0	8	270	2.1326
1.33	6	5	12.2	779.4	17	10	0	1	7	0.535			1.54	0.3	5	11	141.8	850	5			0	8	300	1.1122
1.33	6	5	12.2	779.4	17	30	0	1	7	0.44			1.54	0.3	5	11	141.8	850	5			0	8	330	0.653
1.33	6	5	12.2	779.4	17	50	0	1	7	0.43			1.54	0.3	5	11	141.8	850	5			0	8	360	2.4132
1.33	6	5	12.2	779.4	17	70	0	1	7	0.415			1.54	0.3	5	11	141.8	850	20			0	8	0	1.8265
1.33	6	5	12.2	779.4	17	90	0	1	7	0.38			1.54	0.3	5	11	141.8	850	20			0	8	30	3.459
1.33	8	5	12.2	779.4	17	0	0	1	7	0.468			1.54	0.3	5	11	141.8	850	20			0	8	60	1.9795
1.33	8	5	12.2	779.4	17	0	15	1	7	0.474			1.54	0.3	5	11	141.8	850	20			0	8	90	1.8265
1.33	8	5	12.2	779.4	17	0	30	1	7	0.486			1.54	0.3	5	11	141.8	850	20			0	8	120	1.5459
1.33	8	5	12.2	779.4	17	0	45	1	7	0.506			1.54	0.3	5	11	141.8	850	20			0	8	150	1.5459
1.33	8	5	12.2	779.4	17	10	0	1	7	0.515			1.54	0.3	5	11	141.8	850	20			0	8	180	1.6989
1.33	8	5	12.2	779.4	17	30	0	1	7	0.458			1.54	0.3	5	11	141.8	850	20			0	8	210	1.5459
1.33	8	5	12.2	779.4	17	50	0	1	7	0.488			1.54	0.3	5	11	141.8	850	20			0	8	240	1.8265
1.33	8	5	12.2	779.4	17	70	0	1	7	0.49			1.54	0.3	5	11	141.8	850	20			0	8	270	1.8265
1.33	8	5	12.2	779.4	17	90	0	1	7	0.468			1.54	0.3	5	11	141.8	850	20			0	8	300	1.5459
1.33	1	5	12.2	285.6	25	0	0	2	7	0.266			1.54	0.3	5	11	141.8	850	20			0	8	330	1.2397
1.33	1	5	12.2	285.6	25	0	15	2	7	0.261			1.54	0.3	5	11	141.8	850	20			0	8	360	1.1122
1.33	1	5	12.2	285.6	25	0	30	2	7	0.256			1.54	0.3	5	11	141.8	850	40			0	8	0	1.5459
1.33	1	5	12.2	285.6	25	0	45	2	7	0.261			1.54	0.3	5	11	141.8	850	40			0	8	30	4.4794
1.33	1	5	12.2	285.6	25	10	0	2	7	0.256			1.54	0.3	5	11	141.8	850	40			0	8	60	1.5459
1.33	1	5	12.2	285.6	25	30	0	2	7	0.285			1.54	0.3	5	11	141.8	850	40			0	8	90	1.3928
1.33	1	5	12.2	285.6	25	50	0	2	7	0.289			1.54	0.3	5	11	141.8	850	40			0	8	120	0.9591
1.33	1	5	12.2	285.6	25	70	0	2	7	0.256			1.54	0.3	5	11	141.8	850	40			0	8	150	0.9591
1.33	1	5	12.2	285.6	25	90	0	2	7	0.219			1.54	0.3	5	11	141.8	850	40			0	8	180	1.9795
1.33	4	5	12.2	285.6	25	0	0	2	7	0.242			1.54	0.3	5	11	141.8	850	40			0	8	210	1.1122
1.33	4	5	12.2	285.6	25	0	15	2	7	0.235			1.54	0.3	5	11	141.8	850	40			0	8	240	1.1122
1.33	4	5	12.2	285.6	25	0	30	2	7	0.228			1.54	0.3	5	11	141.8	850	40			0	8	270	1.3928
1.33	4	5	12.2	285.6	25	0	45	2	7	0.226			1.54	0.3	5	11	141.8	850	40			0	8	300	0.9591
1.33	4	5	12.2	285.6	25	10	0	2	7	0.238			1.54	0.3	5	11	141.8	850	40			0	8	330	0.8061
1.33	4	5	12.2	285.6	25	30	0	2	7	0.208			1.54	0.3	5	11	141.8	850	40			0	8	360	0.9591
1.33	4	5	12.2	285.6	25	50	0	2	7	0.228			1.54	0.3	5	11	141.8	850	60			0	8	0	2.2856
1.33	4	5	12.2	285.6	25	70	0	2	7	0.244			1.54	0.3	5	11	141.8	850	60			0	8	30	2.7193
1.33	4	5	12.2	285.6	25	90	0	2	7	0.243			1.54	0.3	5	11	141.8	850	60			0	8	60	1.8265
1.33	6	5	12.2	285.6	25	0	0	2	7	0.293			1.54	0.3	5	11	141.8	850	60			0	8	90	2.1326
1.33	6	5	12.2	285.6	25	0	15	2	7	0.296			1.54	0.3	5	11	141.8	850	60			0	8	120	1.8265
1.33	6	5	12.2	285.6	25	0	30	2	7	0.3			1.54	0.3	5	11	141.8	850	60			0	8	150	2.8723
1.33	6	5	12.2	285.6	25	0	45	2	7	0.267			1.54	0.3	5	11	141.8	850	60			0	8	180	0.9591
1.33	6	5	12.2	285.6	25	10	0	2	7	0.247			1.54	0.3	5	11	141.8	850	60			0	8	210	1.5459
1.33	6	5	12.2	285.6	25	30	0	2	7	0.282			1.54	0.3	5	11	141.8	850	60			0	8	240	1.6989
1.33	6	5	12.2	285.6	25	50	0	2	7	0.282			1.54	0.3	5	11	141.8	850	60			0	8	270	1.2397
1.33	6	5	12.2	285.6	25	70	0	2	7	0.298			1.54	0.3	5	11	141.8	850	60			0	8	300	0.653
1.33	6	5	12.2	285.6	25	90	0	2	7	0.323			1.54	0.3	5	11	141.8	850	60			0	8	330	5.8059
1.33	8	5	12.2	285.6	25	0	0	2	7	0.434			1.54	0.3	5	11	141.8	850	60			0	8	360	6.3926
1.33	8	5	12.2	285.6	25	0	15	2	7	0.406			1.54	0.3	5	11	141.8	850	90			0	8	0	6.9793
1.33	8	5	12.2	285.6	25	0	30	2	7	0.378			1.54	0.3	5	11	141.8	850	90			0	8	30	18.2798
1.33	8	5	12.2	285.6	25	0	45	2	7	0.344			1.54	0.3	5	11	141.8	850	90			0	8	60	10.6526
1.33	8	5	12.2	285.6	25	10	0	2	7	0.404			1.54	0.3	5	11	141.8	850	90			0	8	90	8.4333
1.33	8	5	12.2	285.6	25	30	0	2	7	0.425			1.54	0.3	5	11	141.8	850	90			0	8	120	5.0661
1.33	8	5	12.2	285.6	25	50	0	2	7	0.39			1.54	0.3	5	11	141.8	850	90			0	8	150	3.5866
1.33	8	5	12.2	285.6	25	70	0	2	7	0.347			1.54	0.3	5	11	141.8	850	90			0	8	180	7.8466
1.33	8	5	12.2	285.6	25	90	0	2	7	0.362			1.54	0.3	5	11	141.8	850	90			0	8	210	7.7191
1.33	8	5	12.2	25	375	20	0	1	0	0.19			1.54	0.3	5	11	141.8	850	90			0	8	240	9.7598
1.33	8	5	12.2	25	375	40	0	1	0	0.21			1.54	0.3	5	11	141.8	850	90			0	8	270	12.1066
1.33	8	5	12.2	25	375	60	0	1	0	0.26			1.54	0.3	5	11	141.8	850	90			0	8	300	2.5662
1.33	8	5	12.2	25	375	80	0	1	0	0.2			1.54	0.3	5	11	141.8	850	90			0	8	330	7.1323
1.33	8	5	12.2	25	375	100	0	1	0	0.14			1.54	0.3	5	11	141.8	850	90			0	8	360	12.2597
1.33	8	5	12.2	25	375	20	0	1	15	0.1			1.54	0.3	5	11	141.8	850	120			0	8	0	8.7394
1.33	8	5	12.2	25	375	40	0	1	15	0.17			1.54	0.3	5	11	141.8	850	120			0	8	30	10.1934
1.33	8	5	12.2	25	375	60	0	1	15	0.26			1.54	0.3	5	11	141.8	850	120			0	8	60	8.4333
1.33	8	5	12.2	25	375	80	0	1	15	0.21			1.54	0.3	5	11	141.8	850	120			0	8	90	5.9589
1.33	8	5	12.2	25	375	100	0	1	15	0.15			1.54	0.3	5	11	141.8	850	120			0	8	120	2.2856
1.33	8	5	12.2	25	375	20	0	1	40	0.09			1.54	0.3	5	11	141.8	850	120			0	8	150	1.9795
1.33	8	5	12.2	25	375	40	0	1	40	0.19			1.54	0.3	5	11	141.8	850	120			0	8	180	1.9795
1.33	8	5	12.2	25	375	60	0	1	40	0.27			1.54	0.3	5	11	141.8	850	120			0	8	210	1.6989
1.33	8	5	12.2	25	375	80	0	1	40	0.2			1.54	0.3	5	11	141.8	850	120			0	8	240	1.5459
1.33	8	5	12.2	25	375	100	0	1	40	0.14			1.54	0.3	5	11	141.8	850	120			0	8	270	1.2397
1.33	8	5	12.2	25	375	20	0	1	60	0.07			1.54	0.3	5	11	141.8	850	120			0	8	300	1.6989
1.33	8	5	12.2	25	375	40	0	1	60	0.2			1.54	0.3	5	11	141.8	850	120			0	8	330	11.9536
1.33	8	5	12.2	25	375	60	0	1	60	0.33			1.54	0.3	5	11	141.8	850	120			0	8	360	8.7394
1.33	8	5	12.2	25	375	80	0	1	60	0.25			1.54	0.3	5	11	141.8	850	150			0	8	0	4.7855
1.33	8	5	12.2	25	375	100	0	1	60	0.2			1.54	0.3	5	11	141.8	850	150			0	8	30	8.4333
1.33	8	5	12.2	25	375	20	0	1	90	0.06			1.54	0.3	5	11	141.8	850	150			0	8	60	6.3926
1.33	8	5	12.2	25	375	40	0	1	90	0.24			1.54	0.3	5	11	141.8	850	150			0	8	90	4.4794
1.33	8	5	12.2	25	375	60	0	1	90	0.35			1.54	0.3	5	11	141.8	850	150			0	8	120	1.9795
1.33	8	5	12.2	25	375	80	0	1	90	0.24			1.54	0.3	5	11	141.8	850	150			0	8	150	1.5459
1.33	8	5	12.2	25	375	100	0	1	90	0.19			1.54	0.3	5	11	141.8	850	150			0	8	180	1.8265
1.33	8	5	12.2	25	375	20	0	1	120	0.14			1.54	0.3	5	11	141.8	850	150			0	8	210	1.8265
1.33	8	5	12.2	25	375	40	0	1	120	0.25			1.54	0.3	5	11	141.8	850	150			0	8	240	2.2856
1.33	8	5	12.2	25	375	60	0	1	120	0.31			1.54	0.3	5	11	141.8	850	150			0	8	270	2.7193
1.33	8	5	12.2	25	375	80	0	1	120	0.23			1.54	0.3	5	11	141.8	850	150			0	8	300	1.9795
1.33	8	5	12.2	25	375	100	0	1	120	0.2			1.54	0.3	5	11	141.8	850	150			0	8	330	2.2856
1.33	8	5	12.2	25	375	20	0	1	360	0.03			1.54	0.3	5	11	141.8	850	150			0	8	360	8.3058
1.33	8	5	12.2	25	375	40	0	1	360	0.04			1.54	0.3	5	11	141.8	850	5			0	4	0	0.8066
1.33	8	5	12.2	25	375	60	0	1	360	0.09			1.54	0.3	5	11	141.8	850	5			0	4	30	0.64892
1.33	8	5	12.2	25	375	80	0	1	360	0.05			1.54	0.3	5	11	141.8	850	5			0	4	60	1.12195
1.33	8	5	12.2	25	375	100	0	1	360	0.04			1.54	0.3	5	11	141.8	850	5			0	4	90	0.40897
1.33	8	5	12.2	25	375	20	0	2	360	0.04			1.54	0.3	5	11	141.8	850	5			0	4	120	0.72433
1.33	8	5	12.2	25	375	40	0	2	360	0.11			1.54	0.3	5	11	141.8	850	5			0	4	150	0.29243
1.33	8	5	12.2	25	375	60	0	2	360	0.16			1.54	0.3	5	11	141.8	850	5			0	4	180	0.05934
1.33	8	5	12.2	25	375	80	0	2	360	0.15			1.54	0.3	5	11	141.8	850	5			0	4	210	0.69005
1.33	8	5	12.2	25	375	100	0	2	360	0.14			1.54	0.3	5	11	141.8	850	5			0	4	240	0.56665
1.33	8	5	12.2	25	375	20	0	3	360	0.04			1.54	0.3	5	11	141.8	850	5			0	4	270	0.64892
1.33	8	5	12.2	25	375	40	0	3	360	0.12			1.54	0.3	5	11	141.8	850	5			0	4	300	0.56665
1.33	8	5	12.2	25	375	60	0	3	360	0.2			1.54	0.3	5	11	141.8	850	5			0	4	330	0.40897
1.33	8	5	12.2	25	375	80	0	3	360	0.15			1.54	0.3	5	11	141.8	850	5			0	4	360	0.3747
1.33	8	5	12.2	25	375	100	0	3	360	0.13			1.54	0.3	5	11	141.8	850	20			0	4	0	10.3969
1.33	8	5	12.2	25	375	20	0	4	360	0.05			1.54	0.3	5	11	141.8	850	20			0	4	30	6.0778
1.33	8	5	12.2	25	375	40	0	4	360	0.19			1.54	0.3	5	11	141.8	850	20			0	4	60	8.4773
1.33	8	5	12.2	25	375	60	0	4	360	0.25			1.54	0.3	5	11	141.8	850	20			0	4	90	1.7588
1.33	8	5	12.2	25	375	80	0	4	360	0.2			1.54	0.3	5	11	141.8	850	20			0	4	120	3.3356
1.33	8	5	12.2	25	375	100	0	4	360	0.14			1.54	0.3	5	11	141.8	850	20			0	4	150	1.3475
1.33	8	5	12.2	25	375	20	0	5	360	0.07			1.54	0.3	5	11	141.8	850	20			0	4	180	1.3475
1.33	8	5	12.2	25	375	40	0	5	360	0.2			1.54	0.3	5	11	141.8	850	20			0	4	210	8.4773
1.33	8	5	12.2	25	375	60	0	5	360	0.33			1.54	0.3	5	11	141.8	850	20			0	4	240	6.0778
1.33	8	5	12.2	25	375	80	0	5	360	0.23			1.54	0.3	5	11	141.8	850	20			0	4	270	4.5011
1.33	8	5	12.2	25	375	100	0	5	360	0.19			1.54	0.3	5	11	141.8	850	20			0	4	300	6.9005
1.33	8	5	12.2	25	375	20	0	6	360	0.07			1.54	0.3	5	11	141.8	850	20			0	4	330	6.4892
1.33	8	5	12.2	25	375	40	0	6	360	0.24			1.54	0.3	5	11	141.8	850	20			0	4	360	7.2433
1.33	8	5	12.2	25	375	60	0	6	360	0.35			1.54	0.3	5	11	141.8	850	40			0	4	0	5.3237
1.33	8	5	12.2	25	375	80	0	6	360	0.24			1.54	0.3	5	11	141.8	850	40			0	4	30	3.747
1.33	8	5	12.2	25	375	100	0	6	360	0.19			1.54	0.3	5	11	141.8	850	40			0	4	60	6.0778
1.33	8	5	12.2	25	375	20	0	7	360	0.14			1.54	0.3	5	11	141.8	850	40			0	4	90	0.5934
1.33	8	5	12.2	25	375	40	0	7	360	0.25			1.54	0.3	5	11	141.8	850	40			0	4	120	3.3356
1.33	8	5	12.2	25	375	60	0	7	360	0.39			1.54	0.3	5	11	141.8	850	40			0	4	150	0.9362
1.33	8	5	12.2	25	375	80	0	7	360	0.23			1.54	0.3	5	11	141.8	850	40			0	4	180	0.5934
1.33	8	5	12.2	25	375	100	0	7	360	0.2			1.54	0.3	5	11	141.8	850	40			0	4	210	2.5129
1.33	8	5	12.2	25	375	20	0	7	180	0.09031			1.54	0.3	5	11	141.8	850	40			0	4	240	2.1702
1.33	8	5	12.2	25	375	40	0	7	180	0.15039			1.54	0.3	5	11	141.8	850	40			0	4	270	2.5129
1.33	8	5	12.2	25	375	60	0	7	180	0.2005			1.54	0.3	5	11	141.8	850	40			0	4	300	3.3356
1.33	8	5	12.2	25	375	80	0	7	180	0.17172			1.54	0.3	5	11	141.8	850	40			0	4	330	5.3237
1.33	8	5	12.2	25	375	100	0	7	180	0.13996			1.54	0.3	5	11	141.8	850	40			0	4	360	5.6665
1.33	8	5	12.2	25	375	20	45	7	180	0.10074			1.54	0.3	5	11	141.8	850	60			0	4	0	2.1702
1.33	8	5	12.2	25	375	40	45	7	180	0.17073			1.54	0.3	5	11	141.8	850	60			0	4	30	1.7588
1.33	8	5	12.2	25	375	60	45	7	180	0.24062			1.54	0.3	5	11	141.8	850	60			0	4	60	2.5129
1.33	8	5	12.2	25	375	80	45	7	180	0.18952			1.54	0.3	5	11	141.8	850	60			0	4	90	0.5934
1.33	8	5	12.2	25	375	100	45	7	180	0.15139			1.54	0.3	5	11	141.8	850	60			0	4	120	2.5129
1.33	8	5	12.2	25	375	20	55	7	180	0.15085			1.54	0.3	5	11	141.8	850	60			0	4	150	1.3475
1.33	8	5	12.2	25	375	40	55	7	180	0.19051			1.54	0.3	5	11	141.8	850	60			0	4	180	0.5934
1.33	8	5	12.2	25	375	60	55	7	180	0.27093			1.54	0.3	5	11	141.8	850	60			0	4	210	1.3475
1.33	8	5	12.2	25	375	80	55	7	180	0.2005			1.54	0.3	5	11	141.8	850	60			0	4	240	1.3475
1.33	8	5	12.2	25	375	100	55	7	180	0.14041			1.54	0.3	5	11	141.8	850	60			0	4	270	0.9362
1.33	1	5	6.6	190	372.5	10	0	1	0	0.150806			1.54	0.3	5	11	141.8	850	60			0	4	300	1.7588
1.33	1	5	6.6	190	372.5	20	0	1	0	0.12429			1.54	0.3	5	11	141.8	850	60			0	4	330	2.9243
1.33	1	5	6.6	190	372.5	40	0	1	0	0.479512			1.54	0.3	5	11	141.8	850	60			0	4	360	4.9124
1.33	1	5	6.6	190	372.5	10	30	1	0	0.206731			1.54	0.3	5	11	141.8	850	90			0	4	0	6.9005
1.33	1	5	6.6	190	372.5	20	30	1	0	0.188444			1.54	0.3	5	11	141.8	850	90			0	4	30	6.0778
1.33	1	5	6.6	190	372.5	30	30	1	0	0.469603			1.54	0.3	5	11	141.8	850	90			0	4	60	6.0778
1.33	1	5	6.6	190	372.5	10	0	1	285	0.158578			1.54	0.3	5	11	141.8	850	90			0	4	90	2.9243
1.33	1	5	6.6	190	372.5	20	0	1	285	0.150806			1.54	0.3	5	11	141.8	850	90			0	4	120	4.0897
1.33	1	5	6.6	190	372.5	40	0	1	285	0.221668			1.54	0.3	5	11	141.8	850	90			0	4	150	2.1702
1.33	1	5	6.6	190	372.5	10	30	1	285	0.177929			1.54	0.3	5	11	141.8	850	90			0	4	180	0.5934
1.33	1	5	6.6	190	372.5	20	30	1	285	0.278049			1.54	0.3	5	11	141.8	850	90			0	4	210	1.7588
1.33	1	5	6.6	190	372.5	30	30	1	285	0.6511			1.54	0.3	5	11	141.8	850	90			0	4	240	2.1702
1.33	1	5	11	58	412.5	0	35	1	0	0.501852			1.54	0.3	5	11	141.8	850	90			0	4	270	0.9362
1.33	1	5	11	58	412.5	10	35	1	0	0.35863			1.54	0.3	5	11	141.8	850	90			0	4	300	2.5129
1.33	1	5	11	58	412.5	20	35	1	0	0.379384			1.54	0.3	5	11	141.8	850	90			0	4	330	8.8201
1.33	1	5	11	58	412.5	30	35	1	0	0.312318			1.54	0.3	5	11	141.8	850	90			0	4	360	5.6665
1.33	1	5	11	58	412.5	40	35	1	0	0.309402			1.54	0.3	5	11	141.8	850	120			0	4	0	7.2433
1.33	1	5	11	58	412.5	50	35	1	0	0.277842			1.54	0.3	5	11	141.8	850	120			0	4	30	11.9736
1.33	1	5	11	58	412.5	60	35	1	0	0.276813			1.54	0.3	5	11	141.8	850	120			0	4	60	6.9005
1.33	1	5	11	58	412.5	70	35	1	0	0.290535			1.54	0.3	5	11	141.8	850	120			0	4	90	2.9243
1.33	1	5	11	58	412.5	80	35	1	3	0.20666			1.54	0.3	5	11	141.8	850	120			0	4	120	5.3237
1.33	1	5	11	58	412.5	0	35	1	3	0.541302			1.54	0.3	5	11	141.8	850	120			0	4	150	2.9243
1.33	1	5	11	58	412.5	10	35	1	3	0.243194			1.54	0.3	5	11	141.8	850	120			0	4	180	1.3475
1.33	1	5	11	58	412.5	20	35	1	3	0.257088			1.54	0.3	5	11	141.8	850	120			0	4	210	0.5934
1.33	1	5	11	58	412.5	30	35	1	3	0.216608			1.54	0.3	5	11	141.8	850	120			0	4	240	3.747
1.33	1	5	11	58	412.5	40	35	1	3	0.192938			1.54	0.3	5	11	141.8	850	120			0	4	270	16.3612
1.33	1	5	11	58	412.5	50	35	1	3	0.184019			1.54	0.3	5	11	141.8	850	120			0	4	300	9.6427
1.33	1	5	11	58	412.5	60	35	1	3	0.18985			1.54	0.3	5	11	141.8	850	120			0	4	330	42.7552
1.33	1	5	11	58	412.5	70	35	1	3	0.17407			1.54	0.3	5	11	141.8	850	120			0	4	360	12.385
1.33	1	5	11	58	412.5	80	35	1	3	0.170125			1.54	0.3	5	11	141.8	850	150			0	4	0	6.9005
1.49	2	5	8.3	207	480	100	0	1	1	0.23837			1.54	0.3	5	11	141.8	850	150			0	4	30	9.2314
1.49	2	5	8.3	207	480	100	0	1	50	0.21698			1.54	0.3	5	11	141.8	850	150			0	4	60	6.9005
1.49	2	5	8.3	207	480	100	0	1	60	0.30644			1.54	0.3	5	11	141.8	850	150			0	4	90	2.5129
1.49	2	5	8.3	207	480	100	0	1	70	0.37257			1.54	0.3	5	11	141.8	850	150			0	4	120	5.6665
1.49	2	5	8.3	207	480	100	0	1	80	0.65263			1.54	0.3	5	11	141.8	850	150			0	4	150	3.3356
1.49	2	5	8.3	207	480	100	0	1	90	0.4737			1.54	0.3	5	11	141.8	850	150			0	4	180	0.9362
1.49	2	5	8.3	207	480	100	0	1	100	0.58456			1.54	0.3	5	11	141.8	850	150			0	4	210	2.5129
1.49	2	5	8.3	207	480	100	0	1	110	0.81988			1.54	0.3	5	11	141.8	850	150			0	4	240	4.9124
1.49	2	5	8.3	207	480	100	0	1	120	0.87628			1.54	0.3	5	11	141.8	850	150			0	4	270	11.2195
1.49	2	5	8.3	207	480	100	0	1	130	0.79655			1.54	0.3	5	11	141.8	850	150			0	4	300	11.9736
1.49	2	5	8.3	207	480	100	0	1	140	1.0766			1.54	0.3	5	11	141.8	850	150			0	4	330	5.3237
1.49	3	5	8.3	207	480	100	0	1	1	0.33951			1.54	0.3	5	11	141.8	850	150			0	4	360	10.8082
1.49	3	5	8.3	207	480	100	0	1	50	0.38424			1.54	0.3	5	11	141.8	850	5			0	1	0	69.9168
1.49	3	5	8.3	207	480	100	0	1	60	0.55149			1.54	0.3	5	11	141.8	850	5			0	1	30	28.9426
1.49	3	5	8.3	207	480	100	0	1	70	0.45036			1.54	0.3	5	11	141.8	850	5			0	1	60	12.4892
1.49	3	5	8.3	207	480	100	0	1	80	0.59623			1.54	0.3	5	11	141.8	850	5			0	1	90	10.6847
1.49	3	5	8.3	207	480	100	0	1	90	0.71875			1.54	0.3	5	11	141.8	850	5			0	1	120	17.3722
1.49	3	5	8.3	207	480	100	0	1	100	0.78682			1.54	0.3	5	11	141.8	850	5			0	1	150	10.6847
1.49	3	5	8.3	207	480	100	0	1	110	0.62929			1.54	0.3	5	11	141.8	850	5			0	1	180	4.5279
1.49	3	5	8.3	207	480	100	0	1	120	1.04354			1.54	0.3	5	11	141.8	850	5			0	1	210	6.9694
1.49	3	5	8.3	207	480	100	0	1	130	1.2672			1.54	0.3	5	11	141.8	850	5			0	1	240	8.2432
1.49	3	5	8.3	207	480	100	0	1	140	1.23219			1.54	0.3	5	11	141.8	850	5			0	1	270	14.2938
1.49	4	5	8.3	207	480	100	0	1	1	0.44064			1.54	0.3	5	11	141.8	850	5			0	1	300	9.4109
1.49	4	5	8.3	207	480	100	0	1	50	0.31617			1.54	0.3	5	11	141.8	850	5			0	1	330	13.6569
1.49	4	5	8.3	207	480	100	0	1	60	0.18197			1.54	0.3	5	11	141.8	850	5			0	1	360	13.6569
1.49	4	5	8.3	207	480	100	0	1	70	0.59623			1.54	0.3	5	11	141.8	850	20			0	1	0	32.021
1.49	4	5	8.3	207	480	100	0	1	80	0.97547			1.54	0.3	5	11	141.8	850	20			0	1	30	8.774
1.49	4	5	8.3	207	480	100	0	1	90	0.90935			1.54	0.3	5	11	141.8	850	20			0	1	60	12.4892
1.49	4	5	8.3	207	480	100	0	1	100	1.2108			1.54	0.3	5	11	141.8	850	20			0	1	90	4.5279
1.49	4	5	8.3	207	480	100	0	1	110	0.98714			1.54	0.3	5	11	141.8	850	20			0	1	120	10.0478
1.49	4	5	8.3	207	480	100	0	1	120	1.06493			1.54	0.3	5	11	141.8	850	20			0	1	150	8.2432
1.49	4	5	8.3	207	480	100	0	1	130	1.44612			1.54	0.3	5	11	141.8	850	20			0	1	180	4.5279
1.49	4	5	8.3	207	480	100	0	1	140	1.06493			1.54	0.3	5	11	141.8	850	20			0	1	210	8.2432
1.49	5	5	8.3	207	480	100	0	1	1	0.35118			1.54	0.3	5	11	141.8	850	20			0	1	240	10.0478
1.49	5	5	8.3	207	480	100	0	1	50	0.25004			1.54	0.3	5	11	141.8	850	20			0	1	270	14.9307
1.49	5	5	8.3	207	480	100	0	1	60	1.06493			1.54	0.3	5	11	141.8	850	20			0	1	300	3.891
1.49	5	5	8.3	207	480	100	0	1	70	0.99881			1.54	0.3	5	11	141.8	850	20			0	1	330	17.3722
1.49	5	5	8.3	207	480	100	0	1	80	1.05327			1.54	0.3	5	11	141.8	850	20			0	1	360	19.1767
1.49	5	5	8.3	207	480	100	0	1	90	1.41112			1.54	0.3	5	11	141.8	850	40			0	1	0	57.7095
1.49	5	5	8.3	207	480	100	0	1	100	1.22247			1.54	0.3	5	11	141.8	850	40			0	1	30	33.1887
1.49	5	5	8.3	207	480	100	0	1	110	1.73591			1.54	0.3	5	11	141.8	850	40			0	1	60	28.9426
1.49	5	5	8.3	207	480	100	0	1	120	1.74758			1.54	0.3	5	11	141.8	850	40			0	1	90	6.3325
1.49	5	5	8.3	207	480	100	0	1	130	2.18322			1.54	0.3	5	11	141.8	850	40			0	1	120	13.1261
1.49	5	5	8.3	207	480	100	0	1	140	2.26102			1.54	0.3	5	11	141.8	850	40			0	1	150	12.4892
1.49	6	5	8.3	207	480	100	0	1	1	0.38424			1.54	0.3	5	11	141.8	850	40			0	1	180	8.774
1.49	6	5	8.3	207	480	100	0	1	50	0.38424			1.54	0.3	5	11	141.8	850	40			0	1	210	16.7353
1.49	6	5	8.3	207	480	100	0	1	60	0.89768			1.54	0.3	5	11	141.8	850	40			0	1	240	38.0716
1.49	6	5	8.3	207	480	100	0	1	70	0.88601			1.54	0.3	5	11	141.8	850	40			0	1	270	22.2551
1.49	6	5	8.3	207	480	100	0	1	80	1.06493			1.54	0.3	5	11	141.8	850	40			0	1	300	2.0865
1.49	6	5	8.3	207	480	100	0	1	90	1.23219			1.54	0.3	5	11	141.8	850	40			0	1	330	29.5795
1.49	6	5	8.3	207	480	100	0	1	100	0.97547			1.54	0.3	5	11	141.8	850	40			0	1	360	29.5795
1.49	6	5	8.3	207	480	100	0	1	110	1.14273			1.54	0.3	5	11	141.8	850	60			0	1	0	45.5022
1.49	6	5	8.3	207	480	100	0	1	120	1.47919			1.54	0.3	5	11	141.8	850	60			0	1	30	38.0716
1.49	6	5	8.3	207	480	100	0	1	130	2.31742			1.54	0.3	5	11	141.8	850	60			0	1	60	46.0329
1.49	6	5	8.3	207	480	100	0	1	140	1.98096			1.54	0.3	5	11	141.8	850	60			0	1	90	18.0091
1.49	2	5	8.3	207	480	100	0	2	1	0.73042			1.54	0.3	5	11	141.8	850	60			0	1	120	17.3722
1.49	2	5	8.3	207	480	100	0	2	50	0.64096			1.54	0.3	5	11	141.8	850	60			0	1	150	17.3722
1.49	2	5	8.3	207	480	100	0	2	60	0.86462			1.54	0.3	5	11	141.8	850	60			0	1	180	25.8642
1.49	2	5	8.3	207	480	100	0	2	70	0.96575			1.54	0.3	5	11	141.8	850	60			0	1	210	31.3841
1.49	2	5	8.3	207	480	100	0	2	80	0.74209			1.54	0.3	5	11	141.8	850	60			0	1	240	34.4625
1.49	2	5	8.3	207	480	100	0	2	90	1.17774			1.54	0.3	5	11	141.8	850	60			0	1	270	33.8256
1.49	2	5	8.3	207	480	100	0	2	100	1.27692			1.54	0.3	5	11	141.8	850	60			0	1	300	2.7234
1.49	2	5	8.3	207	480	100	0	2	110	1.42279			1.54	0.3	5	11	141.8	850	60			0	1	330	31.3841
1.49	2	5	8.3	207	480	100	0	2	120	1.67951			1.54	0.3	5	11	141.8	850	60			0	1	360	27.1381
1.49	2	5	8.3	207	480	100	0	2	130	1.35666			1.54	0.3	5	11	141.8	850	90			0	1	0	36.267
1.49	2	5	8.3	207	480	100	0	2	140	1.32165			1.54	0.3	5	11	141.8	850	90			0	1	30	22.892
1.49	3	5	8.3	207	480	100	0	2	1	0.95408			1.54	0.3	5	11	141.8	850	90			0	1	60	33.1887
1.49	3	5	8.3	207	480	100	0	2	50	0.78682			1.54	0.3	5	11	141.8	850	90			0	1	90	15.5676
1.49	3	5	8.3	207	480	100	0	2	60	0.67402			1.54	0.3	5	11	141.8	850	90			0	1	120	16.0984
1.49	3	5	8.3	207	480	100	0	2	70	1.04354			1.54	0.3	5	11	141.8	850	90			0	1	150	14.2938
1.49	3	5	8.3	207	480	100	0	2	80	1.18746			1.54	0.3	5	11	141.8	850	90			0	1	180	18.0091
1.49	3	5	8.3	207	480	100	0	2	90	1.40139			1.54	0.3	5	11	141.8	850	90			0	1	210	19.8136
1.49	3	5	8.3	207	480	100	0	2	100	1.49086			1.54	0.3	5	11	141.8	850	90			0	1	240	25.8642
1.49	3	5	8.3	207	480	100	0	2	110	1.35666			1.54	0.3	5	11	141.8	850	90			0	1	270	22.2551
1.49	3	5	8.3	207	480	100	0	2	120	1.17774			1.54	0.3	5	11	141.8	850	90			0	1	300	2.7234
1.49	3	5	8.3	207	480	100	0	2	130	1.62311			1.54	0.3	5	11	141.8	850	90			0	1	330	30.7472
1.49	3	5	8.3	207	480	100	0	2	140	1.2108			1.54	0.3	5	11	141.8	850	90			0	1	360	24.6966
1.49	4	5	8.3	207	480	100	0	2	1	0.81988			1.54	0.3	5	11	141.8	850	120			0	1	0	27.1381
1.49	4	5	8.3	207	480	100	0	2	50	0.73042			1.54	0.3	5	11	141.8	850	120			0	1	30	17.3722
1.49	4	5	8.3	207	480	100	0	2	60	1.06493			1.54	0.3	5	11	141.8	850	120			0	1	60	28.3057
1.49	4	5	8.3	207	480	100	0	2	70	1.24386			1.54	0.3	5	11	141.8	850	120			0	1	90	20.9813
1.49	4	5	8.3	207	480	100	0	2	80	1.44612			1.54	0.3	5	11	141.8	850	120			0	1	120	23.4228
1.49	4	5	8.3	207	480	100	0	2	90	1.31193			1.54	0.3	5	11	141.8	850	120			0	1	150	16.7353
1.49	4	5	8.3	207	480	100	0	2	100	1.66784			1.54	0.3	5	11	141.8	850	120			0	1	180	19.1767
1.49	4	5	8.3	207	480	100	0	2	110	1.8701			1.54	0.3	5	11	141.8	850	120			0	1	210	0.9188
1.49	4	5	8.3	207	480	100	0	2	120	1.53364			1.54	0.3	5	11	141.8	850	120			0	1	240	30.7472
1.49	4	5	8.3	207	480	100	0	2	130	2.10348			1.54	0.3	5	11	141.8	850	120			0	1	270	31.3841
1.49	4	5	8.3	207	480	100	0	2	140	1.97123			1.54	0.3	5	11	141.8	850	120			0	1	300	0.9188
1.49	5	5	8.3	207	480	100	0	2	1	1.41112			1.54	0.3	5	11	141.8	850	120			0	1	330	30.2164
1.49	5	5	8.3	207	480	100	0	2	50	1.05327			1.54	0.3	5	11	141.8	850	120			0	1	360	25.8642
1.49	5	5	8.3	207	480	100	0	2	60	1.18746			1.54	0.3	5	11	141.8	850	150			0	1	0	20.9813
1.49	5	5	8.3	207	480	100	0	2	70	1.34499			1.54	0.3	5	11	141.8	850	150			0	1	30	19.8136
1.49	5	5	8.3	207	480	100	0	2	80	1.28859			1.54	0.3	5	11	141.8	850	150			0	1	60	14.9307
1.49	5	5	8.3	207	480	100	0	2	90	1.56865			1.54	0.3	5	11	141.8	850	150			0	1	90	11.8523
1.49	5	5	8.3	207	480	100	0	2	100	1.78064			1.54	0.3	5	11	141.8	850	150			0	1	120	20.4506
1.49	5	5	8.3	207	480	100	0	2	110	1.59004			1.54	0.3	5	11	141.8	850	150			0	1	150	14.2938
1.49	5	5	8.3	207	480	100	0	2	120	1.80203			1.54	0.3	5	11	141.8	850	150			0	1	180	14.2938
1.49	5	5	8.3	207	480	100	0	2	130	2.23768			1.54	0.3	5	11	141.8	850	150			0	1	210	1.4495
1.49	5	5	8.3	207	480	100	0	2	140	2.03736			1.54	0.3	5	11	141.8	850	150			0	1	240	20.9813
1.49	6	5	8.3	207	480	100	0	2	1	1.27692			1.54	0.3	5	11	141.8	850	150			0	1	270	25.8642
1.49	6	5	8.3	207	480	100	0	2	50	0.90935			1.54	0.3	5	11	141.8	850	150			0	1	300	1.4495
1.49	6	5	8.3	207	480	100	0	2	60	1.61338			1.54	0.3	5	11	141.8	850	150			0	1	330	19.1767
1.49	6	5	8.3	207	480	100	0	2	70	1.9265			1.54	0.3	5	11	141.8	850	150			0	1	360	23.4228
1.49	6	5	8.3	207	480	100	0	2	80	2.40688			1.54	0.3	5	11	141.8	850	5			0	11	180	6.1314
1.49	6	5	8.3	207	480	100	0	2	90	2.29408			1.54	0.3	5	11	141.8	850	5			0	12	180	2.3473
1.49	6	5	8.3	207	480	100	0	2	100	2.5508			1.54	0.3	5	11	141.8	850	5			0	13	180	3.8908
1.49	6	5	8.3	207	480	100	0	2	110	2.4166			1.54	0.3	5	11	141.8	850	5			0	14	180	4.6974
1.49	6	5	8.3	207	480	100	0	2	120	2.04903			1.54	0.3	5	11	141.8	850	5			0	15	180	1.6004
1.49	6	5	8.3	207	480	100	0	2	130	2.6636			1.54	0.3	5	11	141.8	850	20			0	11	180	2.9249
1.49	6	5	8.3	207	480	100	0	2	140	2.70833			1.54	0.3	5	11	141.8	850	20			0	12	180	3.0941
1.49	2	5	8.3	207	480	100	0	3	1	1.08827			1.54	0.3	5	11	141.8	850	20			0	13	180	2.9746
1.49	2	5	8.3	207	480	100	0	3	50	0.86462			1.54	0.3	5	11	141.8	850	20			0	14	180	3.4327
1.49	2	5	8.3	207	480	100	0	3	60	0.6079			1.54	0.3	5	11	141.8	850	20			0	15	180	1.4311
1.49	2	5	8.3	207	480	100	0	3	70	0.92102			1.54	0.3	5	11	141.8	850	40			0	11	180	1.8294
1.49	2	5	8.3	207	480	100	0	3	80	1.25553			1.54	0.3	5	11	141.8	850	40			0	12	180	2.9746
1.49	2	5	8.3	207	480	100	0	3	90	1.36639			1.54	0.3	5	11	141.8	850	40			0	13	180	8.362
1.49	2	5	8.3	207	480	100	0	3	100	1.28859			1.54	0.3	5	11	141.8	850	40			0	14	180	6.1812
1.49	2	5	8.3	207	480	100	0	3	110	1.63478			1.54	0.3	5	11	141.8	850	40			0	15	180	3.612
1.49	2	5	8.3	207	480	100	0	3	120	1.85843			1.54	0.3	5	11	141.8	850	60			0	11	180	1.8892
1.49	2	5	8.3	207	480	100	0	3	130	1.91483			1.54	0.3	5	11	141.8	850	60			0	12	180	3.0344
1.49	2	5	8.3	207	480	100	0	3	140	1.83704			1.54	0.3	5	11	141.8	850	60			0	13	180	6.699
1.49	3	5	8.3	207	480	100	0	3	1	1.03187			1.54	0.3	5	11	141.8	850	60			0	14	180	4.9862
1.49	3	5	8.3	207	480	100	0	3	50	0.94241			1.54	0.3	5	11	141.8	850	60			0	15	180	3.0941
1.49	3	5	8.3	207	480	100	0	3	60	1.32165			1.54	0.3	5	11	141.8	850	80			0	11	180	1.8294
1.49	3	5	8.3	207	480	100	0	3	70	1.41112			1.54	0.3	5	11	141.8	850	80			0	12	180	3.841
1.49	3	5	8.3	207	480	100	0	3	80	1.55698			1.54	0.3	5	11	141.8	850	80			0	13	180	12.1362
1.49	3	5	8.3	207	480	100	0	3	90	1.47919			1.54	0.3	5	11	141.8	850	80			0	14	180	4.9265
1.49	3	5	8.3	207	480	100	0	3	100	1.65811			1.54	0.3	5	11	141.8	850	80			0	15	180	3.3829
1.49	3	5	8.3	207	480	100	0	3	110	1.46752			1.54	0.3	5	11	141.8	850	100			0	11	180	2.178
1.49	3	5	8.3	207	480	100	0	3	120	1.72424			1.54	0.3	5	11	141.8	850	100			0	12	180	3.0941
1.49	3	5	8.3	207	480	100	0	3	130	1.80203			1.54	0.3	5	11	141.8	850	100			0	13	180	10.8217
1.49	3	5	8.3	207	480	100	0	3	140	1.95956			1.54	0.3	5	11	141.8	850	100			0	14	180	5.1555
1.49	4	5	8.3	207	480	100	0	3	1	1.18746			1.54	0.3	5	11	141.8	850	100			0	15	180	7.7347
1.49	4	5	8.3	207	480	100	0	3	50	0.89768			1.54	0.3	5	11	141.8	850	5			0	8	180	4.6904
1.49	4	5	8.3	207	480	100	0	3	60	1.18746			1.54	0.3	5	11	141.8	850	5			0	9	180	1.1028
1.49	4	5	8.3	207	480	100	0	3	70	1.34499			1.54	0.3	5	11	141.8	850	5			0	10	180	2.5031
1.49	4	5	8.3	207	480	100	0	3	80	1.30026			1.54	0.3	5	11	141.8	850	5			0	11	180	1.369
1.49	4	5	8.3	207	480	100	0	3	90	1.70284			1.54	0.3	5	11	141.8	850	5			0	12	180	1.1028
1.49	4	5	8.3	207	480	100	0	3	100	1.8137			1.54	0.3	5	11	141.8	850	20			0	8	180	1.6351
1.49	4	5	8.3	207	480	100	0	3	110	1.97123			1.54	0.3	5	11	141.8	850	20			0	9	180	0.8366
1.49	4	5	8.3	207	480	100	0	3	120	1.99263			1.54	0.3	5	11	141.8	850	20			0	10	180	1.7624
1.49	4	5	8.3	207	480	100	0	3	130	2.23768			1.54	0.3	5	11	141.8	850	20			0	11	180	1.1607
1.49	4	5	8.3	207	480	100	0	3	140	2.11515			1.54	0.3	5	11	141.8	850	20			0	12	180	1.2995
1.49	5	5	8.3	207	480	100	0	3	1	1.44612			1.54	0.3	5	11	141.8	850	40			0	8	180	1.8319
1.49	5	5	8.3	207	480	100	0	3	50	1.19913			1.54	0.3	5	11	141.8	850	40			0	9	180	1.1607
1.49	5	5	8.3	207	480	100	0	3	60	1.27692			1.54	0.3	5	11	141.8	850	40			0	10	180	1.5657
1.49	5	5	8.3	207	480	100	0	3	70	1.65811			1.54	0.3	5	11	141.8	850	40			0	11	180	0.9639
1.49	5	5	8.3	207	480	100	0	3	80	1.50058			1.54	0.3	5	11	141.8	850	40			0	12	180	1.1028
1.49	5	5	8.3	207	480	100	0	3	90	1.66784			1.54	0.3	5	11	141.8	850	60			0	8	180	1.2995
1.49	5	5	8.3	207	480	100	0	3	100	1.83704			1.54	0.3	5	11	141.8	850	60			0	9	180	1.4963
1.49	5	5	8.3	207	480	100	0	3	110	2.473			1.54	0.3	5	11	141.8	850	60			0	10	180	1.5657
1.49	5	5	8.3	207	480	100	0	3	120	2.74139			1.54	0.3	5	11	141.8	850	60			0	11	180	0.9639
1.49	5	5	8.3	207	480	100	0	3	130	2.92032			1.54	0.3	5	11	141.8	850	60			0	12	180	2.1675
1.49	5	5	8.3	207	480	100	0	3	140	3.08758			1.54	0.3	5	11	141.8	850	80			0	8	180	1.7046
1.49	6	5	8.3	207	480	100	0	3	1	1.72424			1.54	0.3	5	11	141.8	850	80			0	9	180	2.6998
1.49	6	5	8.3	207	480	100	0	3	50	1.52392			1.54	0.3	5	11	141.8	850	80			0	10	180	7.2942
1.49	6	5	8.3	207	480	100	0	3	60	1.80203			1.54	0.3	5	11	141.8	850	80			0	11	180	2.5031
1.49	6	5	8.3	207	480	100	0	3	70	1.98096			1.54	0.3	5	11	141.8	850	80			0	12	180	9.2848
1.49	6	5	8.3	207	480	100	0	3	80	1.76897			1.54	0.3	5	11	141.8	850	100			0	8	180	3.0933
1.49	6	5	8.3	207	480	100	0	3	90	2.28241			1.54	0.3	5	11	141.8	850	100			0	9	180	3.4984
1.49	6	5	8.3	207	480	100	0	3	100	2.45161			1.54	0.3	5	11	141.8	850	100			0	10	180	12.5483
1.49	6	5	8.3	207	480	100	0	3	110	2.74139			1.54	0.3	5	11	141.8	850	100			0	11	180	3.2322
1.49	6	5	8.3	207	480	100	0	3	120	3.12064			1.54	0.3	5	11	141.8	850	100			0	12	180	9.0186
1.49	6	5	8.3	207	480	100	0	3	130	3.46682			1.54	0.3	5	11	141.8	850	5			0	6	180	8.8243
1.49	6	5	8.3	207	480	100	0	3	140	3.22177			1.54	0.3	5	11	141.8	850	5			0	7	180	3.6655
1.49	2	5	8.3	207	480	10	30	3	90	0.40351			1.54	0.3	5	11	141.8	850	5			0	8	180	3.1138
1.49	2	5	8.3	207	480	20	30	3	90	1.55704			1.54	0.3	5	11	141.8	850	5			0	9	180	5.2518
1.49	2	5	8.3	207	480	30	30	3	90	2.5098			1.54	0.3	5	11	141.8	850	5			0	10	180	2.4793
1.49	2	5	8.3	207	480	40	30	3	90	2.96593			1.54	0.3	5	11	141.8	850	20			0	6	180	3.2793
1.49	2	5	8.3	207	480	50	30	3	90	3.04694			1.54	0.3	5	11	141.8	850	20			0	7	180	4.6173
1.49	2	5	8.3	207	480	60	30	3	90	3.02581			1.54	0.3	5	11	141.8	850	20			0	8	180	3.6655
1.49	2	5	8.3	207	480	70	30	3	90	2.97474			1.54	0.3	5	11	141.8	850	20			0	9	180	4.4655
1.49	2	5	8.3	207	480	80	30	3	90	2.82328			1.54	0.3	5	11	141.8	850	20			0	10	180	2.7965
1.49	2	5	8.3	207	480	90	30	3	90	2.45873			1.54	0.3	5	11	141.8	850	40			0	6	180	3.3483
1.49	2	5	8.3	207	480	100	30	3	90	2.30727			1.54	0.3	5	11	141.8	850	40			0	7	180	5.5
1.49	2	5	8.3	207	480	10	40	3	90	0.42288			1.54	0.3	5	11	141.8	850	40			0	8	180	4.8655
1.49	2	5	8.3	207	480	20	40	3	90	1.11147			1.54	0.3	5	11	141.8	850	40			0	9	180	6.6863
1.49	2	5	8.3	207	480	30	40	3	90	1.37564			1.54	0.3	5	11	141.8	850	40			0	10	180	2.4793
1.49	2	5	8.3	207	480	40	40	3	90	1.47603			1.54	0.3	5	11	141.8	850	60			0	6	180	4.231
1.49	2	5	8.3	207	480	50	40	3	90	1.80007			1.54	0.3	5	11	141.8	850	60			0	7	180	6.2035
1.49	2	5	8.3	207	480	60	40	3	90	1.35451			1.54	0.3	5	11	141.8	850	60			0	8	180	8.038
1.49	2	5	8.3	207	480	70	40	3	90	2.37772			1.54	0.3	5	11	141.8	850	60			0	9	180	9.4588
1.49	2	5	8.3	207	480	80	40	3	90	2.43936			1.54	0.3	5	11	141.8	850	60			0	10	180	4.4655
1.49	2	5	8.3	207	480	90	40	3	90	2.59081			1.54	0.3	5	11	141.8	850	80			0	6	180	4.6173
1.49	2	5	8.3	207	480	100	40	3	90	2.16462			1.54	0.3	5	11	141.8	850	80			0	7	180	8.2725
1.49	3	5	8.3	207	480	10	30	3	90	1.7292			1.54	0.3	5	11	141.8	850	80			0	8	180	13.1968
1.49	3	5	8.3	207	480	20	30	3	90	2.19589			1.54	0.3	5	11	141.8	850	80			0	9	180	11.045
1.49	3	5	8.3	207	480	30	30	3	90	2.37729			1.54	0.3	5	11	141.8	850	80			0	10	180	11.1278
1.49	3	5	8.3	207	480	40	30	3	90	2.64145			1.54	0.3	5	11	141.8	850	100			0	6	180	5.0173
1.49	3	5	8.3	207	480	50	30	3	90	2.80348			1.54	0.3	5	11	141.8	850	100			0	7	180	9.1415
1.49	3	5	8.3	207	480	60	30	3	90	3.05532			1.54	0.3	5	11	141.8	850	100			0	8	180	15.8866
1.49	3	5	8.3	207	480	70	30	3	90	3.17683			1.54	0.3	5	11	141.8	850	100			0	9	180	10.5761
1.49	3	5	8.3	207	480	80	30	3	90	2.79291			1.54	0.3	5	11	141.8	850	100			0	10	180	10.2588
1.49	3	5	8.3	207	480	90	30	3	90	2.38785			1.54	0.3	5	11	141.8	850	5			0	4	180	2.3865
1.49	3	5	8.3	207	480	100	30	3	90	2.2364			1.54	0.3	5	11	141.8	850	5			0	5	180	1.5185
1.49	3	5	8.3	207	480	10	40	3	90	1.44566			1.54	0.3	5	11	141.8	850	5			0	6	180	4.5405
1.49	3	5	8.3	207	480	20	40	3	90	1.22199			1.54	0.3	5	11	141.8	850	5			0	7	180	2.1936
1.49	3	5	8.3	207	480	30	40	3	90	1.36464			1.54	0.3	5	11	141.8	850	5			0	8	180	2.0115
1.49	3	5	8.3	207	480	40	40	3	90	1.53723			1.54	0.3	5	11	141.8	850	20			0	4	180	1.5828
1.49	3	5	8.3	207	480	50	40	3	90	1.21319			1.54	0.3	5	11	141.8	850	20			0	5	180	1.1542
1.49	3	5	8.3	207	480	60	40	3	90	1.13218			1.54	0.3	5	11	141.8	850	20			0	6	180	3.6725
1.49	3	5	8.3	207	480	70	40	3	90	0.8275			1.54	0.3	5	11	141.8	850	20			0	7	180	1.9472
1.49	3	5	8.3	207	480	80	40	3	90	0.77643			1.54	0.3	5	11	141.8	850	20			0	8	180	1.4006
1.49	3	5	8.3	207	480	90	40	3	90	0.81694			1.54	0.3	5	11	141.8	850	40			0	4	180	2.14
1.49	3	5	8.3	207	480	100	40	3	90	0.86801			1.54	0.3	5	11	141.8	850	40			0	5	180	3.6725
1.49	4	5	8.3	207	480	10	30	3	90	1.37135			1.54	0.3	5	11	141.8	850	40			0	6	180	5.9014
1.49	4	5	8.3	207	480	20	30	3	90	1.74864			1.54	0.3	5	11	141.8	850	40			0	7	180	1.7007
1.49	4	5	8.3	207	480	30	30	3	90	2.12592			1.54	0.3	5	11	141.8	850	40			0	8	180	2.3865
1.49	4	5	8.3	207	480	40	30	3	90	2.32962			1.54	0.3	5	11	141.8	850	60			0	4	180	3.4903
1.49	4	5	8.3	207	480	50	30	3	90	2.85924			1.54	0.3	5	11	141.8	850	60			0	5	180	4.9048
1.49	4	5	8.3	207	480	60	30	3	90	3.0222			1.54	0.3	5	11	141.8	850	60			0	6	180	5.3442
1.49	4	5	8.3	207	480	70	30	3	90	3.14442			1.54	0.3	5	11	141.8	850	60			0	7	180	2.0758
1.49	4	5	8.3	207	480	80	30	3	90	2.99209			1.54	0.3	5	11	141.8	850	60			0	8	180	4.1118
1.49	4	5	8.3	207	480	90	30	3	90	2.18615			1.54	0.3	5	11	141.8	850	80			0	4	180	4.5405
1.49	4	5	8.3	207	480	100	30	3	90	2.24814			1.54	0.3	5	11	141.8	850	80			0	5	180	4.4762
1.49	4	5	8.3	207	480	10	40	3	90	2.67503			1.54	0.3	5	11	141.8	850	80			0	6	180	12.3633
1.49	4	5	8.3	207	480	20	40	3	90	2.74765			1.54	0.3	5	11	141.8	850	80			0	7	180	6.3301
1.49	4	5	8.3	207	480	30	40	3	90	2.59355			1.54	0.3	5	11	141.8	850	80			0	8	180	10.638
1.49	4	5	8.3	207	480	40	40	3	90	2.55281			1.54	0.3	5	11	141.8	850	100			0	4	180	5.4621
1.49	4	5	8.3	207	480	50	40	3	90	2.43059			1.54	0.3	5	11	141.8	850	100			0	5	180	8.0554
1.49	4	5	8.3	207	480	60	40	3	90	2.02319			1.54	0.3	5	11	141.8	850	100			0	6	180	11.2595
1.49	4	5	8.3	207	480	70	40	3	90	2.22689			1.54	0.3	5	11	141.8	850	100			0	7	180	7.6803
1.49	4	5	8.3	207	480	80	40	3	90	2.79725			1.54	0.3	5	11	141.8	850	100			0	8	180	10.5844
1.49	4	5	8.3	207	480	90	40	3	90	2.85924			1.54	0.3	5	11	141.8	850	5			0	2	180	11.1198
1.49	4	5	8.3	207	480	100	40	3	90	2.89998			1.54	0.3	5	11	141.8	850	5			0	3	180	5.0699
1.49	5	5	8.3	207	480	10	30	3	90	1.55704			1.54	0.3	5	11	141.8	850	5			0	4	180	3.6664
1.49	5	5	8.3	207	480	20	30	3	90	1.85114			1.54	0.3	5	11	141.8	850	5			0	5	180	2.0715
1.49	5	5	8.3	207	480	30	30	3	90	2.46929			1.54	0.3	5	11	141.8	850	5			0	6	180	2.4968
1.49	5	5	8.3	207	480	40	30	3	90	2.88492			1.54	0.3	5	11	141.8	850	20			0	2	180	3.1135
1.49	5	5	8.3	207	480	50	30	3	90	2.64188			1.54	0.3	5	11	141.8	850	20			0	3	180	3.475
1.49	5	5	8.3	207	480	60	30	3	90	3.00644			1.54	0.3	5	11	141.8	850	20			0	4	180	2.3799
1.49	5	5	8.3	207	480	70	30	3	90	2.86378			1.54	0.3	5	11	141.8	850	20			0	5	180	1.827
1.49	5	5	8.3	207	480	80	30	3	90	2.7317			1.54	0.3	5	11	141.8	850	20			0	6	180	1.8908
1.49	5	5	8.3	207	480	90	30	3	90	2.61018			1.54	0.3	5	11	141.8	850	40			0	2	180	4.8253
1.49	5	5	8.3	207	480	100	30	3	90	2.10474			1.54	0.3	5	11	141.8	850	40			0	3	180	5.0061
1.49	5	5	8.3	207	480	10	40	3	90	2.09418			1.54	0.3	5	11	141.8	850	40			0	4	180	2.3161
1.49	5	5	8.3	207	480	20	40	3	90	2.64188			1.54	0.3	5	11	141.8	850	40			0	5	180	1.5186
1.49	5	5	8.3	207	480	30	40	3	90	2.89372			1.54	0.3	5	11	141.8	850	40			0	6	180	2.1991
1.49	5	5	8.3	207	480	40	40	3	90	2.63132			1.54	0.3	5	11	141.8	850	60			0	2	180	6.1119
1.49	5	5	8.3	207	480	50	40	3	90	1.57817			1.54	0.3	5	11	141.8	850	60			0	3	180	8.3128
1.49	5	5	8.3	207	480	60	40	3	90	0.39294			1.54	0.3	5	11	141.8	850	60			0	4	180	2.9328
1.49	5	5	8.3	207	480	70	40	3	90	0.98115			1.54	0.3	5	11	141.8	850	60			0	5	180	1.0295
1.49	5	5	8.3	207	480	80	40	3	90	1.36508			1.54	0.3	5	11	141.8	850	60			0	6	180	3.2305
1.49	5	5	8.3	207	480	90	40	3	90	1.26469			1.54	0.3	5	11	141.8	850	80			0	2	180	8.1214
1.49	5	5	8.3	207	480	100	40	3	90	2.64145			1.54	0.3	5	11	141.8	850	80			0	3	180	7.5154
1.49	6	5	8.3	207	480	10	30	3	90	2.78234			1.54	0.3	5	11	141.8	850	80			0	4	180	4.2087
1.49	6	5	8.3	207	480	20	30	3	90	2.98487			1.54	0.3	5	11	141.8	850	80			0	5	180	1.7632
1.49	6	5	8.3	207	480	30	30	3	90	2.9655			1.54	0.3	5	11	141.8	850	80			0	6	180	2.0077
1.49	6	5	8.3	207	480	40	30	3	90	3.08702			1.54	0.3	5	11	141.8	850	100			0	2	180	7.6323
1.49	6	5	8.3	207	480	50	30	3	90	3.13633			1.54	0.3	5	11	141.8	850	100			0	3	180	7.2708
1.49	6	5	8.3	207	480	60	30	3	90	3.02538			1.54	0.3	5	11	141.8	850	100			0	4	180	3.1773
1.49	6	5	8.3	207	480	70	30	3	90	2.89329			1.54	0.3	5	11	141.8	850	100			0	5	180	1.9546
1.49	6	5	8.3	207	480	80	30	3	90	2.59038			1.54	0.3	5	11	141.8	850	100			0	6	180	2.1991
1.49	6	5	8.3	207	480	90	30	3	90	2.2769			1.54	0.3	5	11	141.8	850	5			0	1	180	9.0355
1.49	6	5	8.3	207	480	100	30	3	90	1.89122			1.54	0.3	5	11	141.8	850	5			0	2	180	9.2309
1.49	6	5	8.3	207	480	10	40	3	90	2.01274			1.54	0.3	5	11	141.8	850	5			0	3	180	8.4378
1.49	6	5	8.3	207	480	20	40	3	90	1.84015			1.54	0.3	5	11	141.8	850	5			0	4	180	6.1963
1.49	6	5	8.3	207	480	30	40	3	90	0.88914			1.54	0.3	5	11	141.8	850	5			0	5	180	6.5297
1.49	6	5	8.3	207	480	40	40	3	90	0.54396			1.54	0.3	5	11	141.8	850	20			0	1	180	3.8169
1.49	6	5	8.3	207	480	50	40	3	90	1.54604			1.54	0.3	5	11	141.8	850	20			0	2	180	6.5871
1.49	6	5	8.3	207	480	60	40	3	90	1.90178			1.54	0.3	5	11	141.8	850	20			0	3	180	6.794
1.49	6	5	8.3	207	480	70	40	3	90	1.64818			1.54	0.3	5	11	141.8	850	20			0	4	180	6.1273
1.49	6	5	8.3	207	480	80	40	3	90	1.56717			1.54	0.3	5	11	141.8	850	20			0	5	180	7.6446
1.49	6	5	8.3	207	480	90	40	3	90	1.43509			1.54	0.3	5	11	141.8	850	40			0	1	180	5.4032
1.665	0.87	5	8.6	213	385.6	5	0	1	0	0.23678			1.54	0.3	5	11	141.8	850	40			0	2	180	8.7711
1.665	0.87	5	8.6	213	385.6	10	0	1	0	0.27305			1.54	0.3	5	11	141.8	850	40			0	3	180	5.3342
1.665	0.87	5	8.6	213	385.6	20	0	1	0	0.29866			1.54	0.3	5	11	141.8	850	40			0	4	180	3.5526
1.665	0.87	5	8.6	213	385.6	30	0	1	0	0.48215			1.54	0.3	5	11	141.8	850	40			0	5	180	4.4721
1.665	0.87	5	8.6	213	385.6	45	0	1	0	0.34773			1.54	0.3	5	11	141.8	850	60			0	1	180	8.1159
1.665	0.87	5	8.6	213	385.6	60	0	1	0	0.36053			1.54	0.3	5	11	141.8	850	60			0	2	180	8.1159
1.665	0.87	5	8.6	213	385.6	80	0	1	0	0.42028			1.54	0.3	5	11	141.8	850	60			0	3	180	5.0009
1.665	0.87	5	8.6	213	385.6	100	0	1	0	0.29866			1.54	0.3	5	11	141.8	850	60			0	4	180	2.3571
1.665	2	5	8.6	213	371.6	5	0	1	0	0.68501			1.54	0.3	5	11	141.8	850	60			0	5	180	4.1503
1.665	2	5	8.6	213	371.6	10	0	1	0	0.66235			1.54	0.3	5	11	141.8	850	80			0	1	180	8.9665
1.665	2	5	8.6	213	371.6	20	0	1	0	0.66235			1.54	0.3	5	11	141.8	850	80			0	2	180	10.8861
1.665	2	5	8.6	213	371.6	30	0	1	0	0.57994			1.54	0.3	5	11	141.8	850	80			0	3	180	5.0009
1.665	2	5	8.6	213	371.6	45	0	1	0	0.89926			1.54	0.3	5	11	141.8	850	80			0	4	180	2.3571
1.665	2	5	8.6	213	371.6	60	0	1	0	0.83951			1.54	0.3	5	11	141.8	850	80			0	5	180	5.4032
1.665	2	5	8.6	213	371.6	80	0	1	0	0.77977			1.54	0.3	5	11	141.8	850	100			0	1	180	10.8286
1.665	2	5	8.6	213	371.6	100	0	1	0	0.81685			1.54	0.3	5	11	141.8	850	100			0	2	180	13.3345
1.665	2	5	8.6	213	371.6	5	0	1	43	0.68501			1.54	0.3	5	11	141.8	850	100			0	3	180	10.7597
1.665	2	5	8.6	213	371.6	10	0	1	43	0.75711			1.54	0.3	5	11	141.8	850	100			0	4	180	3.2882
1.665	2	5	8.6	213	371.6	20	0	1	43	0.74475			1.54	0.3	5	11	141.8	850	100			0	5	180	11.7482
1.665	2	5	8.6	213	371.6	30	0	1	43	0.73239			1.37	0.31	5	11.2	45.7	426.5	10			30	1	120	17.3176
1.665	2	5	8.6	213	371.6	45	0	1	43	0.74475			1.45	0.31	5	11.2	45.7	426.5	20			30	1	120	14.2126
1.665	2	5	8.6	213	371.6	60	0	1	43	0.83951			1.54	0.31	5	11.2	45.7	426.5	30			30	1	120	13.8417
1.665	2	5	8.6	213	371.6	80	0	1	43	0.76947			1.44	0.31	5	11.2	45.7	426.5	40			30	1	120	12.8667
1.665	2	5	8.6	213	371.6	100	0	1	43	0.80449			1.47	0.31	5	11.2	45.7	426.5	60			30	1	120	11.9554
1.665	2	5	8.6	213	371.6	5	0	1	76	1.06407			1.48	0.31	5	11.2	45.7	426.5	80			30	1	120	3.912
1.665	2	5	8.6	213	371.6	10	0	1	76	1.06407			1.52	0.31	5	11.2	45.7	426.5	100			30	1	120	2.6934
1.665	2	5	8.6	213	371.6	20	0	1	76	1.06407			1.37	0.31	5	11.2	45.7	426.5	10			0	1	120	7.0806
1.665	2	5	8.6	213	371.6	30	0	1	76	0.99402			1.45	0.31	5	11.2	45.7	426.5	20			0	1	120	6.6567
1.665	2	5	8.6	213	371.6	45	0	1	76	0.86424			1.54	0.31	5	11.2	45.7	426.5	30			0	1	120	5.5546
1.665	2	5	8.6	213	371.6	60	0	1	76	0.68501			1.44	0.31	5	11.2	45.7	426.5	40			0	1	120	6.1057
1.665	2	5	8.6	213	371.6	80	0	1	76	0.62732			1.47	0.31	5	11.2	45.7	426.5	60			0	1	120	14.9968
1.665	2	5	8.6	213	371.6	100	0	1	76	0.5923			1.48	0.31	5	11.2	45.7	426.5	80			0	1	120	8.0556
1.665	2	5	8.6	213	371.6	5	0	1	103	1.12381			1.52	0.31	5	11.2	45.7	426.5	100			0	1	120	5.1307
1.665	2	5	8.6	213	371.6	10	0	1	103	1.11145			1.37	0.31	5	11.2	45.7	392.6	10			30	1	120	14.1581
1.665	2	5	8.6	213	371.6	20	0	1	103	1.18355			1.45	0.31	5	11.2	45.7	392.6	20			30	1	120	13.9143
1.665	2	5	8.6	213	371.6	30	0	1	103	1.13617			1.54	0.31	5	11.2	45.7	392.6	30			30	1	120	10.7987
1.665	2	5	8.6	213	371.6	45	0	1	103	1.07643			1.44	0.31	5	11.2	45.7	392.6	40			30	1	120	11.5935
1.665	2	5	8.6	213	371.6	60	0	1	103	1.05377			1.47	0.31	5	11.2	45.7	392.6	60			30	1	120	4.0377
1.665	2	5	8.6	213	371.6	80	0	1	103	0.91162			1.48	0.31	5	11.2	45.7	392.6	80			30	1	120	1.4201
1.665	2	5	8.6	213	371.6	100	0	1	103	0.959			1.52	0.31	5	11.2	45.7	392.6	100			30	1	120	2.2149
1.665	2	5	8.6	213	371.6	5	0	1	140	1.4081			1.37	0.31	5	11.2	45.7	392.6	10			0	1	120	8.6051
1.665	2	5	8.6	213	371.6	10	0	1	140	1.58527			1.45	0.31	5	11.2	45.7	392.6	20			0	1	120	10.502
1.665	2	5	8.6	213	371.6	20	0	1	140	1.84691			1.54	0.31	5	11.2	45.7	392.6	30			0	1	120	11.9644
1.665	2	5	8.6	213	371.6	30	0	1	140	1.73978			1.44	0.31	5	11.2	45.7	392.6	40			0	1	120	11.9644
1.665	2	5	8.6	213	371.6	45	0	1	140	1.63266			1.47	0.31	5	11.2	45.7	392.6	60			0	1	120	2.9461
1.665	2	5	8.6	213	371.6	60	0	1	140	1.59763			1.48	0.31	5	11.2	45.7	392.6	80			0	1	120	1.1764
1.665	2	5	8.6	213	371.6	80	0	1	140	1.29068			1.52	0.31	5	11.2	45.7	392.6	100			0	1	120	1.3565
1.665	2	5	8.6	213	371.6	100	0	1	140	1.19591			1.37	0.31	5	11.2	45.7	360	10			30	1	120	13.9155
1.665	3	5	8.6	213	364.5	5	0	1	0	0.86711			1.45	0.31	5	11.2	45.7	360	20			30	1	120	11.3067
1.665	3	5	8.6	213	364.5	10	0	1	0	0.86711			1.54	0.31	5	11.2	45.7	360	30			30	1	120	11.8673
1.665	3	5	8.6	213	364.5	20	0	1	0	0.87958			1.44	0.31	5	11.2	45.7	360	40			30	1	120	10.2503
1.665	3	5	8.6	213	364.5	30	0	1	0	0.97517			1.47	0.31	5	11.2	45.7	360	60			30	1	120	4.8603
1.665	3	5	8.6	213	364.5	45	0	1	0	0.77153			1.48	0.31	5	11.2	45.7	360	80			30	1	120	2.1976
1.665	3	5	8.6	213	364.5	60	0	1	0	0.75906			1.52	0.31	5	11.2	45.7	360	100			30	1	120	1.7557
1.665	3	5	8.6	213	364.5	80	0	1	0	0.75906			1.37	0.31	5	11.2	45.7	360	10			0	1	120	10.5629
1.665	3	5	8.6	213	364.5	100	0	1	0	0.81932			1.45	0.31	5	11.2	45.7	360	20			0	1	120	11.1881
1.665	3	5	8.6	213	364.5	5	0	1	43	1.52377			1.54	0.31	5	11.2	45.7	360	30			0	1	120	12.2338
1.665	3	5	8.6	213	364.5	10	0	1	43	0.95024			1.44	0.31	5	11.2	45.7	360	40			0	1	120	11.684
1.665	3	5	8.6	213	364.5	20	0	1	43	0.80685			1.47	0.31	5	11.2	45.7	360	60			0	1	120	6.2186
1.665	3	5	8.6	213	364.5	30	0	1	43	0.77153			1.48	0.31	5	11.2	45.7	360	80			0	1	120	5.5394
1.665	3	5	8.6	213	364.5	45	0	1	43	0.86711			1.52	0.31	5	11.2	45.7	360	100			0	1	120	2.0036
1.665	3	5	8.6	213	364.5	60	0	1	43	0.9627			1.37	0.31	5	11.2	45.7	327.1	10			30	1	120	13.7781
1.665	3	5	8.6	213	364.5	80	0	1	43	1.14141			1.45	0.31	5	11.2	45.7	327.1	20			30	1	120	12.3157
1.665	3	5	8.6	213	364.5	100	0	1	43	1.20168			1.54	0.31	5	11.2	45.7	327.1	30			30	1	120	12.2627
1.665	3	5	8.6	213	364.5	5	0	1	76	0.9627			1.44	0.31	5	11.2	45.7	327.1	40			30	1	120	11.1606
1.665	3	5	8.6	213	364.5	10	0	1	76	1.18921			1.47	0.31	5	11.2	45.7	327.1	60			30	1	120	11.5845
1.665	3	5	8.6	213	364.5	20	0	1	76	1.22453			1.48	0.31	5	11.2	45.7	327.1	80			30	1	120	10.8533
1.665	3	5	8.6	213	364.5	30	0	1	76	1.22453			1.52	0.31	5	11.2	45.7	327.1	100			30	1	120	9.0941
1.665	3	5	8.6	213	364.5	45	0	1	76	1.17674			1.37	0.31	5	11.2	45.7	327.1	10			0	1	120	9.8253
1.665	3	5	8.6	213	364.5	60	0	1	76	1.27233			1.45	0.31	5	11.2	45.7	327.1	20			0	1	120	10.3128
1.665	3	5	8.6	213	364.5	80	0	1	76	1.41571			1.54	0.31	5	11.2	45.7	327.1	30			0	1	120	12.4428
1.665	3	5	8.6	213	364.5	100	0	1	76	1.35753			1.44	0.31	5	11.2	45.7	327.1	40			0	1	120	12.3793
1.665	3	5	8.6	213	364.5	5	0	1	103	1.39285			1.47	0.31	5	11.2	45.7	327.1	60			0	1	120	12.3157
1.665	3	5	8.6	213	364.5	10	0	1	103	1.46351			1.48	0.31	5	11.2	45.7	327.1	80			0	1	120	12.2627
1.665	3	5	8.6	213	364.5	20	0	1	103	1.39285			1.52	0.31	5	11.2	45.7	327.1	100			0	1	120	8.1192
1.665	3	5	8.6	213	364.5	30	0	1	103	1.38039			1.37	0.31	5	11.2	45.7	294.7	10			30	1	120	16.0619
1.665	3	5	8.6	213	364.5	45	0	1	103	1.29726			1.45	0.31	5	11.2	45.7	294.7	20			30	1	120	14.4464
1.665	3	5	8.6	213	364.5	60	0	1	103	1.35753			1.54	0.31	5	11.2	45.7	294.7	30			30	1	120	13.6332
1.665	3	5	8.6	213	364.5	80	0	1	103	1.07076			1.44	0.31	5	11.2	45.7	294.7	40			30	1	120	13.1995
1.665	3	5	8.6	213	364.5	100	0	1	103	1.11856			1.47	0.31	5	11.2	45.7	294.7	60			30	1	120	13.7525
1.665	3	5	8.6	213	364.5	5	0	1	140	1.77521			1.48	0.31	5	11.2	45.7	294.7	80			30	1	120	12.4514
1.665	3	5	8.6	213	364.5	10	0	1	140	1.70248			1.52	0.31	5	11.2	45.7	294.7	100			30	1	120	12.2021
1.665	3	5	8.6	213	364.5	20	0	1	140	1.84586			1.37	0.31	5	11.2	45.7	294.7	10			0	1	120	8.3314
1.665	3	5	8.6	213	364.5	30	0	1	140	1.96639			1.45	0.31	5	11.2	45.7	294.7	20			0	1	120	11.0745
1.665	3	5	8.6	213	364.5	45	0	1	140	1.84586			1.54	0.31	5	11.2	45.7	294.7	30			0	1	120	11.8876
1.665	3	5	8.6	213	364.5	60	0	1	140	1.73988			1.44	0.31	5	11.2	45.7	294.7	40			0	1	120	12.6357
1.665	3	5	8.6	213	364.5	80	0	1	140	1.36792			1.47	0.31	5	11.2	45.7	294.7	60			0	1	120	12.755
1.665	3	5	8.6	213	364.5	100	0	1	140	1.17674			1.48	0.31	5	11.2	45.7	294.7	80			0	1	120	12.072
1.665	4	5	8.6	213	381.8	5	0	1	0	0.62236			1.52	0.31	5	11.2	45.7	294.7	100			0	1	120	12.2563
1.665	4	5	8.6	213	381.8	10	0	1	0	0.73041			1.37	0.31	5	11.2	45.7	261.8	10			30	1	120	14.9157
1.665	4	5	8.6	213	381.8	20	0	1	0	0.826			1.45	0.31	5	11.2	45.7	261.8	20			30	1	120	13.2192
1.665	4	5	8.6	213	381.8	30	0	1	0	0.56209			1.54	0.31	5	11.2	45.7	261.8	30			30	1	120	13.3983
1.665	4	5	8.6	213	381.8	45	0	1	0	0.50183			1.44	0.31	5	11.2	45.7	261.8	40			30	1	120	11.7017
1.665	4	5	8.6	213	381.8	60	0	1	0	0.62236			1.47	0.31	5	11.2	45.7	261.8	60			30	1	120	11.0378
1.665	4	5	8.6	213	381.8	80	0	1	0	0.54962			1.48	0.31	5	11.2	45.7	261.8	80			30	1	120	12.3024
1.665	4	5	8.6	213	381.8	100	0	1	0	0.52677			1.52	0.31	5	11.2	45.7	261.8	100			30	1	120	10.7955
1.665	4	5	8.6	213	381.8	5	0	1	43	0.96938			1.37	0.31	5	11.2	45.7	261.8	10			0	1	120	8.4245
1.665	4	5	8.6	213	381.8	10	0	1	43	0.84886			1.45	0.31	5	11.2	45.7	261.8	20			0	1	120	10.9746
1.665	4	5	8.6	213	381.8	20	0	1	43	0.83639			1.54	0.31	5	11.2	45.7	261.8	30			0	1	120	12.7871
1.665	4	5	8.6	213	381.8	30	0	1	43	0.76574			1.44	0.31	5	11.2	45.7	261.8	40			0	1	120	12.9136
1.665	4	5	8.6	213	381.8	45	0	1	43	0.81353			1.47	0.31	5	11.2	45.7	261.8	60			0	1	120	10.9746
1.665	4	5	8.6	213	381.8	60	0	1	43	0.81353			1.48	0.31	5	11.2	45.7	261.8	80			0	1	120	12.06
1.665	4	5	8.6	213	381.8	80	0	1	43	0.80107			1.52	0.31	5	11.2	45.7	261.8	100			0	1	120	6.612
1.665	4	5	8.6	213	381.8	100	0	1	43	0.84886			1.54	1	5	8	210	180	0			0	1	7	2.2127
1.665	4	5	8.6	213	381.8	5	0	1	76	1.3746			1.54	1	5	8	210	180	30			0	1	7	2.276
1.665	4	5	8.6	213	381.8	10	0	1	76	1.36213			1.54	1	5	8	210	180	50			0	1	7	1.3478
1.665	4	5	8.6	213	381.8	20	0	1	76	1.50551			1.54	1	5	8	210	180	100			0	1	7	0.2448
1.665	4	5	8.6	213	381.8	30	0	1	76	1.53045			1.54	1	5	8	210	180	150			0	1	7	0.8295
1.665	4	5	8.6	213	381.8	45	0	1	76	1.35174			1.54	1	5	8	210	180	200			0	1	7	1.2031
1.665	4	5	8.6	213	381.8	60	0	1	76	1.12316			1.54	1	5	8	210	180	300			0	1	7	1.3568
1.665	4	5	8.6	213	381.8	80	0	1	76	0.94445			1.54	1	5	8	210	240	0			0	1	7	0.5003
1.665	4	5	8.6	213	381.8	100	0	1	76	1.02757			1.54	1	5	8	210	240	30			0	1	7	0.3165
1.665	4	5	8.6	213	381.8	5	0	1	103	1.54084			1.54	1	5	8	210	240	50			0	1	7	0.5817
1.665	4	5	8.6	213	381.8	10	0	1	103	1.70916			1.54	1	5	8	210	240	100			0	1	7	0.9463
1.665	4	5	8.6	213	381.8	20	0	1	103	1.67383			1.54	1	5	8	210	240	150			0	1	7	1.0006
1.665	4	5	8.6	213	381.8	30	0	1	103	1.68422			1.54	1	5	8	210	240	200			0	1	7	1.1934
1.665	4	5	8.6	213	381.8	45	0	1	103	1.6489			1.54	1	5	8	210	240	300			0	1	7	1.8202
1.665	4	5	8.6	213	381.8	60	0	1	103	1.69669			1.54	1	5	8	210	300	0			0	1	7	0.2069
1.665	4	5	8.6	213	381.8	80	0	1	103	1.68422			1.54	1	5	8	210	300	30			0	1	7	0.6776
1.665	4	5	8.6	213	381.8	100	0	1	103	1.67383			1.54	1	5	8	210	300	50			0	1	7	1.1872
1.665	4	5	8.6	213	381.8	5	0	1	140	2.48634			1.54	1	5	8	210	300	100			0	1	7	0.9954
1.665	4	5	8.6	213	381.8	10	0	1	140	2.10398			1.54	1	5	8	210	300	150			0	1	7	1.0403
1.665	4	5	8.6	213	381.8	20	0	1	140	2.29516			1.54	1	5	8	210	300	200			0	1	7	1.6849
1.665	4	5	8.6	213	381.8	30	0	1	140	2.52166			1.54	1	5	8	210	300	300			0	1	7	2.0566
1.665	4	5	8.6	213	381.8	45	0	1	140	2.29516			1.54	1	5	8	210	360	0			0	1	7	1.0051
1.665	4	5	8.6	213	381.8	60	0	1	140	2.00839			1.54	1	5	8	210	360	30			0	1	7	0.6451
1.665	4	5	8.6	213	381.8	80	0	1	140	1.18342			1.54	1	5	8	210	360	50			0	1	7	1.0951
1.665	4	5	8.6	213	381.8	100	0	1	140	1.01718			1.54	1	5	8	210	360	100			0	1	7	0.9376
1.665	0.87	5	8.6	213	385.6	5	0	2	0	0.15581			1.54	1	5	8	210	360	150			0	1	7	1.3844
1.665	0.87	5	8.6	213	385.6	10	0	2	0	0.25494			1.54	1	5	8	210	360	200			0	1	7	2.3295
1.665	0.87	5	8.6	213	385.6	20	0	2	0	0.25494			1.54	1	5	8	210	360	300			0	1	7	2.6766
1.665	0.87	5	8.6	213	385.6	30	0	2	0	0.42405			1.54	1	5	8	210	180	0			0	1	360	2.0668
1.665	0.87	5	8.6	213	385.6	45	0	2	0	0.322			1.54	1	5	8	210	180	30			0	1	360	1.9357
1.665	0.87	5	8.6	213	385.6	60	0	2	0	0.25494			1.54	1	5	8	210	180	50			0	1	360	1.862
1.665	0.87	5	8.6	213	385.6	80	0	2	0	0.28993			1.54	1	5	8	210	180	100			0	1	360	2.176
1.665	0.87	5	8.6	213	385.6	100	0	2	0	0.33949			1.54	1	5	8	210	180	150			0	1	360	1.7528
1.665	2	5	8.6	213	371.6	10	0	2	0	0.33849			1.54	1	5	8	210	180	200			0	1	360	2.2252
1.665	2	5	8.6	213	371.6	20	0	2	0	0.35359			1.54	1	5	8	210	180	300			0	1	360	1.9194
1.665	2	5	8.6	213	371.6	30	0	2	0	0.73711			1.54	1	5	8	210	240	0			0	1	360	1.2075
1.665	2	5	8.6	213	371.6	40	0	2	0	1.01493			1.54	1	5	8	210	240	30			0	1	360	1.0153
1.665	2	5	8.6	213	371.6	50	0	2	0	1.18706			1.54	1	5	8	210	240	50			0	1	360	1.4409
1.665	2	5	8.6	213	371.6	60	0	2	0	1.31087			1.54	1	5	8	210	240	100			0	1	360	1.1745
1.665	2	5	8.6	213	371.6	70	0	2	0	1.43166			1.54	1	5	8	210	240	150			0	1	360	1.5398
1.665	2	5	8.6	213	371.6	80	0	2	0	1.39542			1.54	1	5	8	210	240	200			0	1	360	2.0121
1.665	2	5	8.6	213	371.6	90	0	2	0	1.36221			1.54	1	5	8	210	240	300			0	1	360	1.5151
1.665	2	5	8.6	213	371.6	100	0	2	0	1.39542			1.54	1	5	8	210	300	0			0	1	360	0.4995
1.665	2	5	8.6	213	371.6	10	0	2	98	1.01493			1.54	1	5	8	210	300	30			0	1	360	0.3723
1.665	2	5	8.6	213	371.6	20	0	2	98	0.75523			1.54	1	5	8	210	300	50			0	1	360	0.6691
1.665	2	5	8.6	213	371.6	30	0	2	98	1.03305			1.54	1	5	8	210	300	100			0	1	360	0.8415
1.665	2	5	8.6	213	371.6	40	0	2	98	1.1025			1.54	1	5	8	210	300	150			0	1	360	1.3276
1.665	2	5	8.6	213	371.6	50	0	2	98	1.27463			1.54	1	5	8	210	300	200			0	1	360	1.5678
1.665	2	5	8.6	213	371.6	60	0	2	98	1.24141			1.54	1	5	8	210	300	300			0	1	360	1.8165
1.665	2	5	8.6	213	371.6	70	0	2	98	1.18706			1.54	1	5	8	210	360	0			0	1	360	1.0128
1.665	2	5	8.6	213	371.6	80	0	2	98	1.01493			1.54	1	5	8	210	360	30			0	1	360	1.1398
1.665	2	5	8.6	213	371.6	90	0	2	98	1.06627			1.54	1	5	8	210	360	50			0	1	360	1.3635
1.665	2	5	8.6	213	371.6	100	0	2	98	1.17196			1.54	1	5	8	210	360	100			0	1	360	1.6894
1.665	2	5	8.6	213	371.6	10	0	2	116	0.99681			1.54	1	5	8	210	360	150			0	1	360	1.5734
1.665	2	5	8.6	213	371.6	20	0	2	116	0.78844			1.54	1	5	8	210	360	200			0	1	360	1.9407
1.665	2	5	8.6	213	371.6	30	0	2	116	0.96359			1.54	1	5	8	210	360	300			0	1	360	2.134
1.665	2	5	8.6	213	371.6	40	0	2	116	1.03305			1.44	1	5	12.8	500	40	30	30	0	0	1	0	0.644
1.665	2	5	8.6	213	371.6	50	0	2	116	1.2233			1.44	1	5	12.8	500	40	30	30	0	0	1	10	0.8021
1.665	2	5	8.6	213	371.6	60	0	2	116	1.31087			1.44	1	5	12.8	500	40	30	30	0	0	1	20	0.8078
1.665	2	5	8.6	213	371.6	70	0	2	116	1.36221			1.44	1	5	12.8	500	40	30	30	0	0	1	34	0.7802
1.665	2	5	8.6	213	371.6	80	0	2	116	1.38033			1.44	1	5	12.8	500	40	30	30	0	0	1	48	0.6221
1.665	2	5	8.6	213	371.6	90	0	2	116	1.04815			1.44	3	5	12.8	500	40	30	30		0	1	0	0.8459
1.665	2	5	8.6	213	371.6	100	0	2	116	0.94547			1.44	3	5	12.8	500	40	30	30		0	1	10	0.9993
1.665	2	5	8.6	213	371.6	10	0	2	128	1.20518			1.44	3	5	12.8	500	40	30	30		0	1	20	0.9336
1.665	2	5	8.6	213	371.6	20	0	2	128	0.99681			1.44	3	5	12.8	500	40	30	30		0	1	34	1.0546
1.665	2	5	8.6	213	371.6	30	0	2	128	1.15384			1.44	3	5	12.8	500	40	30	30		0	1	48	1.0107
1.665	2	5	8.6	213	371.6	40	0	2	128	1.24141			1.44	5	5	12.8	500	40	30	30		0	1	0	8.298
1.665	2	5	8.6	213	371.6	50	0	2	128	1.25651			1.44	5	5	12.8	500	40	30	30		0	1	10	10.765
1.665	2	5	8.6	213	371.6	60	0	2	128	1.13572			1.44	5	5	12.8	500	40	30	30		0	1	20	10.546
1.665	2	5	8.6	213	371.6	70	0	2	128	1.1025			1.44	5	5	12.8	500	40	30	30		0	1	34	12.679
1.665	2	5	8.6	213	371.6	80	0	2	128	1.15384			1.44	5	5	12.8	500	40	30	30		0	1	48	12.622
1.665	2	5	8.6	213	371.6	90	0	2	128	1.29275			1.44	7	5	12.8	500	40	30	30		0	1	0	0.885
1.665	2	5	8.6	213	371.6	100	0	2	128	1.53434			1.44	7	5	12.8	500	40	30	30		0	1	10	1.1689
1.665	4	5	8.6	213	364.5	10	0	2	0	0.44751			1.44	7	5	12.8	500	40	30	30		0	1	20	1.2346
1.665	4	5	8.6	213	364.5	20	0	2	0	0.44751			1.44	7	5	12.8	500	40	30	30		0	1	34	1.4756
1.665	4	5	8.6	213	364.5	30	0	2	0	0.54956			1.44	7	5	12.8	500	40	30	30		0	1	48	1.3118
1.665	4	5	8.6	213	364.5	40	0	2	0	0.59913			1.44	9	5	12.8	500	40	30	30		0	1	0	0.8298
1.665	4	5	8.6	213	364.5	50	0	2	0	0.8178			1.44	9	5	12.8	500	40	30	30		0	1	10	1.4375
1.665	4	5	8.6	213	364.5	60	0	2	0	0.95193			1.44	9	5	12.8	500	40	30	30		0	1	20	1.3661
1.665	4	5	8.6	213	364.5	70	0	2	0	1.08605			1.44	9	5	12.8	500	40	30	30		0	1	34	1.7223
1.665	4	5	8.6	213	364.5	80	0	2	0	1.03356			1.44	9	5	12.8	500	40	30	30		0	1	48	1.5585
1.665	4	5	8.6	213	364.5	90	0	2	0	1.01899			1.44	1	5	12.8	500	20	30	30	0	0	1	0	0.7466
1.665	4	5	8.6	213	364.5	100	0	2	0	1.01899			1.44	1	5	12.8	500	20	30	30	0	0	1	10	0.7409
1.665	4	5	8.6	213	364.5	10	0	2	98	0.6487			1.44	1	5	12.8	500	20	30	30	0	0	1	20	0.9335
1.665	4	5	8.6	213	364.5	20	0	2	98	0.59913			1.44	1	5	12.8	500	20	30	30	0	0	1	34	0.9172
1.665	4	5	8.6	213	364.5	30	0	2	98	0.91694			1.44	1	5	12.8	500	20	30	30	0	0	1	48	0.8731
1.665	4	5	8.6	213	364.5	40	0	2	98	0.91694			1.44	3	5	12.8	500	20	30	30		0	1	0	0.8463
1.665	4	5	8.6	213	364.5	50	0	2	98	1.05106			1.44	3	5	12.8	500	20	30	30		0	1	10	0.9891
1.665	4	5	8.6	213	364.5	60	0	2	98	1.10062			1.44	3	5	12.8	500	20	30	30		0	1	20	0.9613
1.665	4	5	8.6	213	364.5	70	0	2	98	1.00149			1.44	3	5	12.8	500	20	30	30		0	1	34	0.9671
1.665	4	5	8.6	213	364.5	80	0	2	98	0.83238			1.44	3	5	12.8	500	20	30	30		0	1	48	0.9508
1.665	4	5	8.6	213	364.5	90	0	2	98	0.75074			1.44	5	5	12.8	500	20	30	30		0	1	0	0.8846
1.665	4	5	8.6	213	364.5	100	0	2	98	0.71576			1.44	5	5	12.8	500	20	30	30		0	1	10	1.2153
1.665	4	5	8.6	213	364.5	10	0	2	116	1.35429			1.44	5	5	12.8	500	20	30	30		0	1	20	1.2421
1.665	4	5	8.6	213	364.5	20	0	2	116	1.23475			1.44	5	5	12.8	500	20	30	30		0	1	34	1.2095
1.665	4	5	8.6	213	364.5	30	0	2	116	1.33679			1.44	5	5	12.8	500	20	30	30		0	1	48	1.2038
1.665	4	5	8.6	213	364.5	40	0	2	116	1.18518			1.44	7	5	12.8	500	20	30	30		0	1	0	1.0936
1.665	4	5	8.6	213	364.5	50	0	2	116	1.36887			1.44	7	5	12.8	500	20	30	30		0	1	10	1.2862
1.665	4	5	8.6	213	364.5	60	0	2	116	1.62253			1.44	7	5	12.8	500	20	30	30		0	1	20	1.4242
1.665	4	5	8.6	213	364.5	70	0	2	116	1.20267			1.44	7	5	12.8	500	20	30	30		0	1	34	1.4683
1.665	4	5	8.6	213	364.5	80	0	2	116	0.91694			1.44	7	5	12.8	500	20	30	30		0	1	48	1.4683
1.665	4	5	8.6	213	364.5	90	0	2	116	0.80031			1.44	9	5	12.8	500	20	30	30		0	1	0	1.1271
1.665	4	5	8.6	213	364.5	100	0	2	116	0.8178			1.44	9	5	12.8	500	20	30	30		0	1	10	1.3859
1.665	4	5	8.6	213	364.5	10	0	2	128	1.43593			1.44	9	5	12.8	500	20	30	30		0	1	20	1.4961
1.665	4	5	8.6	213	364.5	20	0	2	128	1.35429			1.44	9	5	12.8	500	20	30	30		0	1	34	1.6111
1.665	4	5	8.6	213	364.5	30	0	2	128	1.28723			1.44	9	5	12.8	500	20	30	30		0	1	48	1.6063
1.665	4	5	8.6	213	364.5	40	0	2	128	1.26973			1.3	1.2	5	6.85	166.35	0	5			0	1	0	2.1475
1.665	4	5	8.6	213	364.5	50	0	2	128	1.53798			1.3	1.2	5	6.85	166.35	0	10			0	1	0	1.4516
1.665	4	5	8.6	213	364.5	60	0	2	128	1.97241			1.3	1.2	5	6.85	166.35	0	20			0	1	0	1.9325
1.665	4	5	8.6	213	364.5	70	0	2	128	2.02489			1.3	1.2	5	6.85	166.35	0	40			0	1	0	1.7956
1.665	4	5	8.6	213	364.5	80	0	2	128	1.70417			1.3	1.2	5	6.85	166.35	0	60			0	1	0	3.2146
1.665	4	5	8.6	213	364.5	90	0	2	128	1.50299			1.3	1.2	5	6.85	166.35	0	80			0	1	0	2.3229
1.665	4	5	8.6	213	364.5	100	0	2	128	1.40385			1.3	1.2	5	6.85	166.35	0	100			0	1	0	1.9778
1.665	6	5	8.6	213	381.8	10	0	2	0	0.47939			1.3	1.2	5	6.85	166.35	360	5			0	1	111	1.3928
1.665	6	5	8.6	213	381.8	20	0	2	0	0.54587			1.3	1.2	5	6.85	166.35	360	10			0	1	111	0.8915
1.665	6	5	8.6	213	381.8	30	0	2	0	0.54587			1.3	1.2	5	6.85	166.35	360	20			0	1	111	1.1257
1.665	6	5	8.6	213	381.8	40	0	2	0	0.82917			1.3	1.2	5	6.85	166.35	360	40			0	1	111	1.0669
1.665	6	5	8.6	213	381.8	50	0	2	0	0.86097			1.3	1.2	5	6.85	166.35	360	60			0	1	111	1.4709
1.665	6	5	8.6	213	381.8	60	0	2	0	1.01128			1.3	1.2	5	6.85	166.35	360	80			0	1	111	1.2298
1.665	6	5	8.6	213	381.8	70	0	2	0	1.10957			1.3	1.2	5	6.85	166.35	360	100			0	1	111	1.223
1.665	6	5	8.6	213	381.8	80	0	2	0	1.29169			1.3	1.2	5	6.85	166.35	420	5			0	1	111	1.2491
1.665	6	5	8.6	213	381.8	90	0	2	0	1.32638			1.3	1.2	5	6.85	166.35	420	10			0	1	111	1.145
1.665	6	5	8.6	213	381.8	100	0	2	0	1.12691			1.3	1.2	5	6.85	166.35	420	20			0	1	111	1.0081
1.665	6	5	8.6	213	381.8	10	0	2	98	1.10957			1.3	1.2	5	6.85	166.35	420	40			0	1	111	0.982
1.665	6	5	8.6	213	381.8	20	0	2	98	1.01128			1.3	1.2	5	6.85	166.35	420	60			0	1	111	0.904
1.665	6	5	8.6	213	381.8	30	0	2	98	1.04308			1.3	1.2	5	6.85	166.35	420	80			0	1	111	0.8723
1.665	6	5	8.6	213	381.8	40	0	2	98	1.14426			1.3	1.2	5	6.85	166.35	420	100			0	1	111	0.8915
1.665	6	5	8.6	213	381.8	50	0	2	98	1.07777			1.3	1.2	5	6.85	166.35	480	5			0	1	111	0.9368
1.665	6	5	8.6	213	381.8	60	0	2	98	1.14426			1.3	1.2	5	6.85	166.35	480	10			0	1	111	0.7354
1.665	6	5	8.6	213	381.8	70	0	2	98	1.1934			1.3	1.2	5	6.85	166.35	480	20			0	1	111	0.8847
1.665	6	5	8.6	213	381.8	80	0	2	98	1.10957			1.3	1.2	5	6.85	166.35	480	40			0	1	111	0.9956
1.665	6	5	8.6	213	381.8	90	0	2	98	1.04308			1.3	1.2	5	6.85	166.35	480	60			0	1	111	0.8134
1.665	6	5	8.6	213	381.8	100	0	2	98	0.87831			1.3	1.2	5	6.85	166.35	480	80			0	1	111	0.8519
1.665	6	5	8.6	213	381.8	10	0	2	116	1.7571			1.3	1.2	5	6.85	166.35	480	100			0	1	111	0.8462
1.665	6	5	8.6	213	381.8	20	0	2	116	1.37552			1.3	1	5	8	46.4	465	10			0	1	3	8.72
1.665	6	5	8.6	213	381.8	30	0	2	116	1.25989			1.3	1	5	8	46.4	465	20			0	1	3	8.97
1.665	6	5	8.6	213	381.8	40	0	2	116	1.39286			1.3	1	5	8	46.4	465	30			0	1	3	9.15
1.665	6	5	8.6	213	381.8	50	0	2	116	1.47669			1.3	1	5	8	46.4	465	40			0	1	3	9.36
1.665	6	5	8.6	213	381.8	60	0	2	116	1.47669			1.3	1	5	8	46.4	465	10			0	2	3	8.94
1.665	6	5	8.6	213	381.8	70	0	2	116	1.47669			1.3	1	5	8	46.4	465	20			0	2	3	9.15
1.665	6	5	8.6	213	381.8	80	0	2	116	1.25989			1.3	1	5	8	46.4	465	30			0	2	3	9.13
1.665	6	5	8.6	213	381.8	90	0	2	116	1.27723			1.3	1	5	8	46.4	465	40			0	2	3	9.52
1.665	6	5	8.6	213	381.8	100	0	2	116	1.1616			1.3	1	5	6.9	183.8	450	20			0	1	0	1.64
1.665	6	5	8.6	213	381.8	10	0	2	128	1.89007			1.3	1	5	6.9	183.8	450	20			0	1	10	1.54
1.665	6	5	8.6	213	381.8	20	0	2	128	1.70795			1.3	1	5	6.9	183.8	450	20			0	1	60	1.25
1.665	6	5	8.6	213	381.8	30	0	2	128	2.08953			1.3	1	5	6.9	183.8	450	20			0	1	90	1.07
1.665	6	5	8.6	213	381.8	40	0	2	128	2.02305			1.3	1	5	6.9	183.8	450	20			0	1	135	1.02
1.665	6	5	8.6	213	381.8	50	0	2	128	1.92476			1.3	1	5	6.9	183.8	450	40			0	1	0	1.74
1.665	6	5	8.6	213	381.8	60	0	2	128	1.85827			1.3	1	5	6.9	183.8	450	40			0	1	10	1.68
1.665	6	5	8.6	213	381.8	70	0	2	128	1.69061			1.3	1	5	6.9	183.8	450	40			0	1	60	1.57
1.665	6	5	8.6	213	381.8	80	0	2	128	1.67616			1.3	1	5	6.9	183.8	450	40			0	1	90	1.5
1.665	6	5	8.6	213	381.8	90	0	2	128	1.44201			1.3	1	5	6.9	183.8	450	40			0	1	135	1.45
1.665	6	5	8.6	213	381.8	100	0	2	128	1.02863			1.3	1	5	6.9	183.8	450	60			0	1	0	1.79
1.665	8	5	8.6	213	405	10	0	2	0	0.37201			1.3	1	5	6.9	183.8	450	60			0	1	10	1.79
1.665	8	5	8.6	213	405	20	0	2	0	0.38965			1.3	1	5	6.9	183.8	450	60			0	1	60	1.85
1.665	8	5	8.6	213	405	30	0	2	0	0.57494			1.3	1	5	6.9	183.8	450	60			0	1	90	1.91
1.665	8	5	8.6	213	405	40	0	2	0	0.91316			1.3	1	5	6.9	183.8	450	60			0	1	135	1.92
1.665	8	5	8.6	213	405	50	0	2	0	0.91316			1.3	1	5	6.9	183.8	450	80			0	1	0	1.71
1.665	8	5	8.6	213	405	60	0	2	0	0.94845			1.3	1	5	6.9	183.8	450	80			0	1	10	1.63
1.665	8	5	8.6	213	405	70	0	2	0	1.0308			1.3	1	5	6.9	183.8	450	80			0	1	60	1.66
1.665	8	5	8.6	213	405	80	0	2	0	1.23373			1.3	1	5	6.9	183.8	450	80			0	1	90	1.68
1.665	8	5	8.6	213	405	90	0	2	0	1.40431			1.3	1	5	6.9	183.8	450	80			0	1	135	1.67
1.665	8	5	8.6	213	405	100	0	2	0	1.13373			1.3	1	5	6.9	183.8	450	100			0	1	0	1.46
1.665	8	5	8.6	213	405	10	0	2	98	1.13373			1.3	1	5	6.9	183.8	450	100			0	1	10	1.42
1.665	8	5	8.6	213	405	20	0	2	98	1.35431			1.3	1	5	6.9	183.8	450	100			0	1	60	1.43
1.665	8	5	8.6	213	405	30	0	2	98	1.20138			1.3	1	5	6.9	183.8	450	100			0	1	90	1.42
1.665	8	5	8.6	213	405	40	0	2	98	1.28667			1.3	1	5	6.9	183.8	450	100			0	1	135	1.4
1.665	8	5	8.6	213	405	50	0	2	98	1.28667			1.3	1	5	6.9	183.8	450	0			20	1	0	1.64884
1.665	8	5	8.6	213	405	60	0	2	98	1.30137			1.3	1	5	6.9	183.8	450	0			20	1	10	1.60972
1.665	8	5	8.6	213	405	70	0	2	98	1.35431			1.3	1	5	6.9	183.8	450	0			20	1	60	1.49862
1.665	8	5	8.6	213	405	80	0	2	98	1.42195			1.3	1	5	6.9	183.8	450	0			20	1	90	1.37932
1.665	8	5	8.6	213	405	90	0	2	98	1.18373			1.3	1	5	6.9	183.8	450	0			20	1	135	1.23731
1.665	8	5	8.6	213	405	100	0	2	98	1.20138			1.3	1	5	6.9	183.8	450	0			20	1	0	1.61551
1.665	8	5	8.6	213	405	10	0	2	116	0.9808			1.3	1	5	6.9	183.8	450	0			20	1	10	1.62082
1.665	8	5	8.6	213	405	20	0	2	116	1.25137			1.3	1	5	6.9	183.8	450	0			20	1	60	1.57639
1.665	8	5	8.6	213	405	30	0	2	116	1.4896			1.3	1	5	6.9	183.8	450	0			20	1	90	1.45998
1.665	8	5	8.6	213	405	40	0	2	116	1.89546			1.3	1	5	6.9	183.8	450	0			20	1	135	1.38463
1.665	8	5	8.6	213	405	50	0	2	116	1.4543			1.48	7	5	8.3	140.2	360	60			0	2	0	2.1
1.665	8	5	8.6	213	405	60	0	2	116	1.52195			1.48	7	5	8.3	140.2	360	60			0	4	0	2.4
1.665	8	5	8.6	213	405	70	0	2	116	1.58959			1.48	7	5	8.3	140.2	360	60			0	6	0	4
1.665	8	5	8.6	213	405	80	0	2	116	1.40431			1.48	7	5	8.3	140.2	360	60			0	8	0	4.7
1.665	8	5	8.6	213	405	90	0	2	116	1.21902			1.48	7	5	8.3	140.2	360	60			0	10	0	1.18
1.665	8	5	8.6	213	405	100	0	2	116	0.94845			1.48	7	5	8.3	140.2	360	60			0	2	135	6.2
1.665	8	5	8.6	213	405	10	0	2	128	1.62488			1.48	7	5	8.3	140.2	360	60			0	4	135	1.4
1.665	8	5	8.6	213	405	20	0	2	128	1.77488			1.48	7	5	8.3	140.2	360	60			0	6	135	3.3
1.665	8	5	8.6	213	405	30	0	2	128	2.21603			1.48	7	5	8.3	140.2	360	60			0	8	135	4.1
1.665	8	5	8.6	213	405	40	0	2	128	2.40131			1.48	7	5	8.3	140.2	360	60			0	10	135	1.17
1.665	8	5	8.6	213	405	50	0	2	128	2.45131			1.48	7	5	8.3	140.2	360	100			0	2	0	4.2
1.665	8	5	8.6	213	405	60	0	2	128	2.14839			1.48	7	5	8.3	140.2	360	100			0	4	0	5.2
1.665	8	5	8.6	213	405	70	0	2	128	2.19838			1.48	7	5	8.3	140.2	360	100			0	6	0	7.8
1.665	8	5	8.6	213	405	80	0	2	128	2.04545			1.48	7	5	8.3	140.2	360	100			0	8	0	0.2
1.665	8	5	8.6	213	405	90	0	2	128	1.81017			1.48	7	5	8.3	140.2	360	100			0	10	0	17.9
1.665	8	5	8.6	213	405	100	0	2	128	1.36901			1.48	7	5	8.3	140.2	360	100			0	2	135	6.8
1.33	0.2	5	8	105.3	0	40	0	1	0	4.71902			1.48	7	5	8.3	140.2	360	100			0	4	135	9
1.33	0.2	10	8	105.3	0	40	0	1	0	4.71902			1.48	7	5	8.3	140.2	360	100			0	6	135	12
1.33	0.2	15	8	105.3	0	40	0	1	0	4.71902			1.48	7	5	8.3	140.2	360	100			0	8	135	15.7
1.33	0.2	20	8	105.3	0	40	0	1	0	4.71902			1.48	7	5	8.3	140.2	360	100			0	10	135	23.6
1.33	0.2	25	8	105.3	0	40	0	1	0	4.71902			1.44	0.26	5	10.7	150	285	100			0	1	14	12.2959
1.33	0.2	5	8	105.3	665	40	0	1	120	0.829556			1.44	0.26	5	10.7	150	285	100			0	1	44	9.3242
1.33	0.2	10	8	105.3	460	40	0	1	120	0.896026			1.44	0.26	5	10.7	150	285	100			0	1	73	9.0438
1.33	0.2	15	8	105.3	293	40	0	1	120	2.46852			1.44	0.26	5	10.7	150	285	100			0	1	103	9.8849
1.33	0.2	20	8	105.3	273	40	0	1	120	2.85025			1.44	0.26	5	10.7	150	285	100			0	1	132	9.8849
1.33	0.2	25	8	105.3	254	40	0	1	120	2.82936			1.44	0.26	5	10.7	150	285	100			0	1	161	10.6138
1.33	0.2	5	8	105.3	636	40	0	2	120	0.82006			1.44	0.26	5	10.7	150	285	100			27.5	1	14	12.8005
1.33	0.2	10	8	105.3	460	40	0	2	120	0.86374			1.44	0.26	5	10.7	150	285	100			27.5	1	44	11.4548
1.33	0.2	15	8	105.3	372	40	0	2	120	1.82471			1.44	0.26	5	10.7	150	285	100			27.5	1	73	10.5016
1.33	0.2	20	8	105.3	362	40	0	2	120	2.46852			1.44	0.26	5	10.7	150	285	100			27.5	1	103	13.0809
1.33	0.2	25	8	105.3	244	40	0	2	120	2.5236			1.44	0.26	5	10.7	150	285	100			27.5	1	132	14.9873
1.33	0.2	5	8	105.3	627	40	0	3	120	0.546582			1.44	0.26	5	10.7	150	285	100			27.5	1	161	16.2348
1.33	0.2	10	8	105.3	541	40	0	3	120	0.829556			1.44	0.26	5	10.7	150	285	100			60	1	14	14.763
1.33	0.2	15	8	105.3	363	40	0	3	120	1.52844			1.44	0.26	5	10.7	150	285	100			60	1	44	15.9545
1.33	0.2	20	8	105.3	274	40	0	3	120	1.99943			1.44	0.26	5	10.7	150	285	100			60	1	73	12.8566
1.33	0.2	25	8	105.3	235	40	0	3	120	2.08679			1.44	0.26	5	10.7	150	285	100			60	1	103	15.8423
1.5	6	5	6.85	105	450	20	0	1	0	6.26			1.44	0.26	5	10.7	150	285	100			60	1	132	16.4591
1.5	6	5	6.85	105	450	20	0	1	18	3.21			1.44	0.26	5	10.7	150	285	100			60	1	161	18.0291
1.5	6	5	6.85	105	450	20	0	1	40	1.43			1.44	0.26	5	10.7	150	390	100			0	1	14	12.9312
1.5	6	5	6.85	105	450	20	0	1	66	0.57			1.44	0.26	5	10.7	150	390	100			0	1	44	10.0022
1.5	6	5	6.85	105	450	20	0	1	76	0.68			1.44	0.26	5	10.7	150	390	100			0	1	73	5.8528
1.5	6	5	6.85	105	450	20	0	1	86	0.7			1.44	0.26	5	10.7	150	390	100			0	1	103	9.8069
1.5	6	5	6.85	105	450	20	0	1	95	0.71			1.44	0.26	5	10.7	150	390	100			0	1	132	8.1472
1.5	6	5	6.85	105	450	20	0	1	108	0.82			1.44	0.26	5	10.7	150	390	100			0	1	161	8.7818
1.5	6	5	6.85	105	450	40	0	1	0	4.76			1.44	0.26	5	10.7	150	390	100			27.5	1	14	12.2477
1.5	6	5	6.85	105	450	40	0	1	18	3.33			1.44	0.26	5	10.7	150	390	100			27.5	1	44	10.9297
1.5	6	5	6.85	105	450	40	0	1	40	2.23			1.44	0.26	5	10.7	150	390	100			27.5	1	73	8.3425
1.5	6	5	6.85	105	450	40	0	1	66	1.91			1.44	0.26	5	10.7	150	390	100			27.5	1	103	11.7596
1.5	6	5	6.85	105	450	40	0	1	76	2.1			1.44	0.26	5	10.7	150	390	100			27.5	1	132	11.2714
1.5	6	5	6.85	105	450	40	0	1	86	2.35			1.44	0.26	5	10.7	150	390	100			27.5	1	161	12.1501
1.5	6	5	6.85	105	450	40	0	1	95	2.43			1.44	0.26	5	10.7	150	390	100			60	1	14	14.6519
1.5	6	5	6.85	105	450	40	0	1	108	2.54			1.44	0.26	5	10.7	150	390	100			60	1	44	12.1501
1.5	6	5	6.85	105	450	60	0	1	0	4.98			1.44	0.26	5	10.7	150	390	100			60	1	73	11.0762
1.5	6	5	6.85	105	450	60	0	1	18	4.27			1.44	0.26	5	10.7	150	390	100			60	1	103	15.9212
1.5	6	5	6.85	105	450	60	0	1	40	2.15			1.44	0.26	5	10.7	150	390	100			60	1	132	13.0288
1.5	6	5	6.85	105	450	60	0	1	66	3.05			1.44	0.26	5	10.7	150	390	100			60	1	161	14.359
1.5	6	5	6.85	105	450	60	0	1	76	3.66			1.44	0.26	5	10.7	150	495	100			0	1	14	12.9069
1.5	6	5	6.85	105	450	60	0	1	86	3.75			1.44	0.26	5	10.7	150	495	100			0	1	44	9.8838
1.5	6	5	6.85	105	450	60	0	1	95	3.81			1.44	0.26	5	10.7	150	495	100			0	1	73	8.1492
1.5	6	5	6.85	105	450	60	0	1	108	4.06			1.44	0.26	5	10.7	150	495	100			0	1	103	10.5281
1.5	6	5	6.85	105	450	80	0	1	0	4.36			1.44	0.26	5	10.7	150	495	100			0	1	132	7.7527
1.5	6	5	6.85	105	450	80	0	1	18	4.11			1.44	0.26	5	10.7	150	495	100			0	1	161	8.397
1.5	6	5	6.85	105	450	80	0	1	40	2.1			1.44	0.26	5	10.7	150	495	100			27.5	1	14	12.3618
1.5	6	5	6.85	105	450	80	0	1	66	2.96			1.44	0.26	5	10.7	150	495	100			27.5	1	44	13.1547
1.5	6	5	6.85	105	450	80	0	1	76	3.23			1.44	0.26	5	10.7	150	495	100			27.5	1	73	11.0732
1.5	6	5	6.85	105	450	80	0	1	86	3.64			1.44	0.26	5	10.7	150	495	100			27.5	1	103	12.4113
1.5	6	5	6.85	105	450	80	0	1	95	3.7			1.44	0.26	5	10.7	150	495	100			27.5	1	132	7.1085
1.5	6	5	6.85	105	450	80	0	1	108	4.2			1.44	0.26	5	10.7	150	495	100			27.5	1	161	8.0005
1.5	1	5	5.2	147	375	20	0	1	0	0.69701			1.44	0.26	5	10.7	150	495	100			60	1	14	14.6911
1.5	1	5	5.2	147	375	40	0	1	0	0.63046			1.44	0.26	5	10.7	150	495	100			60	1	44	16.1283
1.5	1	5	5.2	147	375	60	0	1	0	0.71154			1.44	0.26	5	10.7	150	495	100			60	1	73	13.6503
1.5	1	5	5.2	147	375	80	0	1	0	0.72376			1.44	0.26	5	10.7	150	495	100			60	1	103	13.6008
1.5	1	5	5.2	147	375	100	0	1	0	0.69343			1.44	0.26	5	10.7	150	495	100			60	1	132	8.7439
1.5	1	5	5.2	147	375	20	0	1	25	0.54684			1.44	0.26	5	10.7	150	495	100			60	1	161	10.0325
1.5	1	5	5.2	147	375	40	0	1	25	0.41837			1.44	0.26	5	10.7	150	285	5			0	1	360	4.5333
1.5	1	5	5.2	147	375	60	0	1	25	0.55779			1.44	0.26	5	10.7	150	285	10			0	1	360	7.0525
1.5	1	5	5.2	147	375	80	0	1	25	0.77094			1.44	0.26	5	10.7	150	285	20			0	1	360	7.8951
1.5	1	5	5.2	147	375	100	0	1	25	0.58686			1.44	0.26	5	10.7	150	285	40			0	1	360	8.54
1.5	1	5	5.2	147	375	20	0	1	55	0.57106			1.44	0.26	5	10.7	150	285	60			0	1	360	12.495
1.5	1	5	5.2	147	375	40	0	1	55	0.29726			1.44	0.26	5	10.7	150	285	80			0	1	360	7.7919
1.5	1	5	5.2	147	375	60	0	1	55	0.3893			1.44	0.26	5	10.7	150	285	100			0	1	360	19.2617
1.5	1	5	5.2	147	375	80	0	1	55	0.79389			1.44	0.26	5	10.7	150	285	5			27.5	1	360	11.1108
1.5	1	5	5.2	147	375	100	0	1	55	0.56011			1.44	0.26	5	10.7	150	285	10			27.5	1	360	11.0468
1.5	1	5	5.2	147	375	20	0	1	65	0.53589			1.44	0.26	5	10.7	150	285	20			27.5	1	360	15.6075
1.5	1	5	5.2	147	375	40	0	1	65	0.2901			1.44	0.26	5	10.7	150	285	40			27.5	1	360	16.6909
1.5	1	5	5.2	147	375	60	0	1	65	0.32991			1.44	0.26	5	10.7	150	285	60			27.5	1	360	16.6909
1.5	1	5	5.2	147	375	80	0	1	65	0.80127			1.44	0.26	5	10.7	150	285	80			27.5	1	360	14.6188
1.5	1	5	5.2	147	375	100	0	1	65	0.43774			1.44	0.26	5	10.7	150	285	100			27.5	1	360	19.7604
1.5	1	5	5.2	147	375	20	0	1	90	0.41352			1.44	0.26	5	10.7	150	285	5			60	1	360	18.4191
1.5	1	5	5.2	147	375	40	0	1	90	0.27557			1.44	0.26	5	10.7	150	285	10			60	1	360	17.7312
1.5	1	5	5.2	147	375	60	0	1	90	0.44259			1.44	0.26	5	10.7	150	285	20			60	1	360	18.4707
1.5	1	5	5.2	147	375	80	0	1	90	0.80232			1.44	0.26	5	10.7	150	285	40			60	1	360	19.7604
1.5	1	5	5.2	147	375	100	0	1	90	0.39899			1.44	0.26	5	10.7	150	285	60			60	1	360	15.7021
1.5	1	5	5.2	147	375	20	0	1	110	0.64983			1.44	0.26	5	10.7	150	285	80			60	1	360	17.4303
1.5	1	5	5.2	147	375	40	0	1	110	0.37835			1.44	0.26	5	10.7	150	285	100			60	1	360	19.4078
1.5	1	5	5.2	147	375	60	0	1	110	0.46807			1.44	0.26	5	10.7	150	390	5			0	1	360	5.0014
1.5	1	5	5.2	147	375	80	0	1	110	0.76967			1.44	0.26	5	10.7	150	390	10			0	1	360	4.4855
1.5	1	5	5.2	147	375	100	0	1	110	0.48029			1.44	0.26	5	10.7	150	390	20			0	1	360	4.9257
1.5	1	5	5.2	147	375	10	25	1	55	0.38866			1.44	0.26	5	10.7	150	390	40			0	1	360	6.5421
1.5	1	5	5.2	147	375	30	25	1	55	0.31792			1.44	0.26	5	10.7	150	390	60			0	1	360	8.9152
1.5	1	5	5.2	147	375	50	25	1	55	0.5622			1.44	0.26	5	10.7	150	390	80			0	1	360	7.4913
1.5	1	5	5.2	147	375	70	25	1	55	0.7703			1.44	0.26	5	10.7	150	390	100			0	1	360	15.8004
1.5	1	5	5.2	147	375	90	25	1	55	0.53863			1.44	0.26	5	10.7	150	390	5			27.5	1	360	6.5077
1.5	1	5	5.2	147	375	10	35	1	55	0.75768			1.44	0.26	5	10.7	150	390	10			27.5	1	360	6.2257
1.5	1	5	5.2	147	375	30	35	1	55	0.40922			1.44	0.26	5	10.7	150	390	20			27.5	1	360	9.3141
1.5	1	5	5.2	147	375	50	35	1	55	0.61731			1.44	0.26	5	10.7	150	390	40			27.5	1	360	11.13
1.5	1	5	5.2	147	375	70	35	1	55	0.74836			1.44	0.26	5	10.7	150	390	60			27.5	1	360	12.3956
1.5	1	5	5.2	147	375	90	35	1	55	0.51971			1.44	0.26	5	10.7	150	390	80			27.5	1	360	11.13
1.39	7	5	12.5	681.72	135	40	0	1	0	0.24709			1.44	0.26	5	10.7	150	390	100			27.5	1	360	18.4486
1.39	7	5	12.5	681.72	135	40	0	1	10	0.32481			1.44	0.26	5	10.7	150	390	5			60	1	360	11.3295
1.39	7	5	12.5	681.72	135	40	0	1	20	0.30538			1.44	0.26	5	10.7	150	390	10			60	1	360	8.757
1.39	7	5	12.5	681.72	135	40	0	1	30	0.40759			1.44	0.26	5	10.7	150	390	20			60	1	360	7.5326
1.39	7	5	12.5	681.72	135	40	0	1	40	0.47517			1.44	0.26	5	10.7	150	390	40			60	1	360	14.4523
1.39	7	5	12.5	681.72	135	40	0	1	50	0.41688			1.44	0.26	5	10.7	150	390	60			60	1	360	14.4935
1.39	7	5	12.5	681.72	135	40	0	1	60	0.5098			1.44	0.26	5	10.7	150	390	80			60	1	360	16.6671
1.39	7	5	12.5	681.72	135	40	0	1	70	0.38309			1.44	0.26	5	10.7	150	390	100			60	1	360	17.8915
1.39	7	5	12.5	681.72	135	40	0	1	80	0.46081			1.44	0.26	5	10.7	150	495	5			0	1	360	5.8238
1.39	7	5	12.5	681.72	135	40	0	1	90	0.44138			1.44	0.26	5	10.7	150	495	10			0	1	360	5.6784
1.39	7	5	12.5	681.72	135	40	0	1	100	0.24202			1.44	0.26	5	10.7	150	495	20			0	1	360	6.6108
1.39	7	5	12.5	681.72	135	40	0	1	110	0.30031			1.44	0.26	5	10.7	150	495	40			0	1	360	8.5783
1.39	7	5	12.5	681.72	135	40	0	1	120	0.23189			1.44	0.26	5	10.7	150	495	60			0	1	360	14.0359
1.39	7	5	12.5	681.72	135	40	0	1	130	0.26652			1.44	0.26	5	10.7	150	495	80			0	1	360	9.7075
1.39	1.2	5	12.5	681.72	135	40	0	1	0	0.48024			1.44	0.26	5	10.7	150	495	100			0	1	360	14.6262
1.39	1.2	5	12.5	681.72	135	40	0	1	10	0.57231			1.44	0.26	5	10.7	150	495	5			27.5	1	360	6.9017
1.39	1.2	5	12.5	681.72	135	40	0	1	20	0.9668			1.44	0.26	5	10.7	150	495	10			27.5	1	360	7.9881
1.39	1.2	5	12.5	681.72	135	40	0	1	30	0.93301			1.44	0.26	5	10.7	150	495	20			27.5	1	360	8.3816
1.39	1.2	5	12.5	681.72	135	40	0	1	40	0.98116			1.44	0.26	5	10.7	150	495	40			27.5	1	360	8.9718
1.39	1.2	5	12.5	681.72	135	40	0	1	50	0.89838			1.44	0.26	5	10.7	150	495	60			27.5	1	360	7.8426
1.39	1.2	5	12.5	681.72	135	40	0	1	60	1.03438			1.44	0.26	5	10.7	150	495	80			27.5	1	360	11.0334
1.39	1.2	5	12.5	681.72	135	40	0	1	70	1.02002			1.44	0.26	5	10.7	150	495	100			27.5	1	360	14.3781
1.39	1.2	5	12.5	681.72	135	40	0	1	80	1.1273			1.44	0.26	5	10.7	150	495	5			60	1	360	12.4106
1.39	1.2	5	12.5	681.72	135	40	0	1	90	0.94231			1.44	0.26	5	10.7	150	495	10			60	1	360	10.5458
1.39	1.2	5	12.5	681.72	135	40	0	1	100	0.41688			1.44	0.26	5	10.7	150	495	20			60	1	360	13.343
1.39	1.2	5	12.5	681.72	135	40	0	1	110	0.58752			1.44	0.26	5	10.7	150	495	40			60	1	360	15.3105
1.39	1.2	5	12.5	681.72	135	40	0	1	120	0.38816			1.44	0.26	5	10.7	150	495	60			60	1	360	10.2977
1.39	1.2	5	12.5	681.72	135	40	0	1	130	0.42702			1.44	0.26	5	10.7	150	495	80			60	1	360	11.8717
1.39	7	5	12.5	681.72	135	100	0	1	0	0.39819			1.44	0.26	5	10.7	150	495	100			60	1	360	13.1548
1.39	7	5	12.5	681.72	135	100	0	1	10	0.50903			1.44	0.2	5	9.9	100	495	10			0	1	360	3.56841
1.39	7	5	12.5	681.72	135	100	0	1	20	0.47208			1.44	0.2	5	9.9	100	495	20			0	1	360	4.37456
1.39	7	5	12.5	681.72	135	100	0	1	30	0.51385			1.44	0.2	5	9.9	100	495	40			0	1	360	3.0467
1.39	7	5	12.5	681.72	135	100	0	1	40	0.51867			1.44	0.2	5	9.9	100	495	60			0	1	360	2.1959
1.39	7	5	12.5	681.72	135	100	0	1	50	0.44879			1.44	0.2	5	9.9	100	495	100			0	1	360	1.70481
1.39	7	5	12.5	681.72	135	100	0	1	60	0.49538			1.44	0.2	5	9.9	100	495	150			0	1	360	1.52113
1.39	7	5	12.5	681.72	135	100	0	1	70	0.45361			1.44	0.2	5	9.9	100	495	10			45	1	360	5.62972
1.39	7	5	12.5	681.72	135	100	0	1	80	0.49056			1.44	0.2	5	9.9	100	495	20			45	1	360	5.51874
1.39	7	5	12.5	681.72	135	100	0	1	90	0.48654			1.44	0.2	5	9.9	100	495	40			45	1	360	4.36691
1.39	7	5	12.5	681.72	135	100	0	1	100	0.54196			1.44	0.2	5	9.9	100	495	60			45	1	360	2.65128
1.39	7	5	12.5	681.72	135	100	0	1	110	0.48654			1.44	0.2	5	9.9	100	495	100			45	1	360	2.07855
1.39	7	5	12.5	681.72	135	100	0	1	120	0.36606			1.44	0.2	5	9.9	100	495	150			45	1	360	1.61679
1.39	7	5	12.5	681.72	135	100	0	1	130	0.36606			1.44	0.2	5	9.9	100	495	10			75	1	360	5.91544
1.39	1.2	5	12.5	681.72	135	100	0	1	0	0.68975			1.44	0.2	5	9.9	100	495	20			75	1	360	4.85928
1.39	1.2	5	12.5	681.72	135	100	0	1	10	0.73553			1.44	0.2	5	9.9	100	495	40			75	1	360	3.02502
1.39	1.2	5	12.5	681.72	135	100	0	1	20	0.63433			1.44	0.2	5	9.9	100	495	60			75	1	360	2.20355
1.39	1.2	5	12.5	681.72	135	100	0	1	30	0.84717			1.44	0.2	5	9.9	100	495	100			75	1	360	1.7418
1.39	1.2	5	12.5	681.72	135	100	0	1	40	0.89295			1.44	0.2	5	9.9	100	495	150			75	1	360	1.6895
1.39	1.2	5	12.5	681.72	135	100	0	1	50	0.84235			1.75	1	5	11.48	57.5	525	100			0	1	0	1.65
1.39	1.2	5	12.5	681.72	135	100	0	1	60	0.97649			1.75	1	5	11.48	57.5	525	100			0	1	360	6.05
1.39	1.2	5	12.5	681.72	135	100	0	1	70	0.9813			1.75	1	5	11.48	57.5	525	100			45	1	0	1.35
1.39	1.2	5	12.5	681.72	135	100	0	1	80	1.0552			1.75	1	5	11.48	57.5	525	100			45	1	360	4.66
1.39	1.2	5	12.5	681.72	135	100	0	1	90	0.89295			1.75	1	5	11.48	57.5	525	100			70	1	0	0.98
1.39	1.2	5	12.5	681.72	135	100	0	1	100	0.65762			1.75	1	5	11.48	57.5	525	100			70	1	360	6.29
1.39	1.2	5	12.5	681.72	135	100	0	1	110	0.68011			1.5	0.83	5	10.4	46.7	250	10			0	1	0	28.0795
1.39	1.2	5	12.5	681.72	135	100	0	1	120	0.56043			1.5	0.83	5	10.4	46.7	250	10			0	1	7	6.1461
1.39	1.2	5	12.5	681.72	135	100	0	1	130	0.61987			1.5	0.83	5	10.4	46.7	250	10			0	1	15	4.3444
1.39	1.2	5	12.5	53.9	135	10	0	1	123	0.64063			1.5	0.83	5	10.4	46.7	250	10			0	1	23	8.2611
1.39	1.2	5	12.5	53.9	135	20	0	1	123	0.49703			1.5	0.83	5	10.4	46.7	250	10			0	1	30	12.3083
1.39	1.2	5	12.5	53.9	135	30	0	1	123	0.4024			1.5	0.83	5	10.4	46.7	250	10			0	1	37	11.2639
1.39	1.2	5	12.5	53.9	135	40	0	1	123	0.4024			1.5	0.83	5	10.4	46.7	250	10			0	1	44	26.8784
1.39	1.2	5	12.5	53.9	135	50	0	1	123	0.39958			1.5	0.83	5	10.4	46.7	250	10			0	1	51	14.9978
1.39	1.2	5	12.5	53.9	135	60	0	1	123	0.40523			1.5	0.83	5	10.4	46.7	250	10			0	1	58	24.92
1.39	1.2	5	12.5	53.9	135	80	0	1	123	0.41323			1.5	3	5	10.4	46.7	250	10			0	1	0	22.5178
1.39	1.2	5	12.5	53.9	135	100	0	1	123	0.55118			1.5	3	5	10.4	46.7	250	10			0	1	7	6.7466
1.39	7	5	12.5	53.9	135	10	0	1	123	1.16498			1.5	3	5	10.4	46.7	250	10			0	1	15	9.4622
1.39	7	5	12.5	53.9	135	20	0	1	123	1.00315			1.5	3	5	10.4	46.7	250	10			0	1	23	15.5983
1.39	7	5	12.5	53.9	135	30	0	1	123	0.93818			1.5	3	5	10.4	46.7	250	10			0	1	30	11.2639
1.39	7	5	12.5	53.9	135	40	0	1	123	0.99797			1.5	3	5	10.4	46.7	250	10			0	1	37	10.7939
1.39	7	5	12.5	53.9	135	50	0	1	123	0.88121			1.5	3	5	10.4	46.7	250	10			0	1	44	24.0061
1.39	7	5	12.5	53.9	135	60	0	1	123	0.9137			1.5	3	5	10.4	46.7	250	10			0	1	51	10.0627
1.39	7	5	12.5	53.9	135	80	0	1	123	0.84072			1.5	3	5	10.4	46.7	250	10			0	1	58	20.7161
1.39	7	5	12.5	53.9	135	100	0	1	123	1.06294			1.5	5	5	10.4	46.7	250	10			0	1	0	17.4
1.39	1.2	5	12.5	541.1	135	10	0	1	150	0.15193			1.5	5	5	10.4	46.7	250	10			0	1	7	15.5983
1.39	1.2	5	12.5	541.1	135	20	0	1	150	0.26099			1.5	5	5	10.4	46.7	250	10			0	1	15	14.7105
1.39	1.2	5	12.5	541.1	135	30	0	1	150	0.34391			1.5	5	5	10.4	46.7	250	10			0	1	23	21.0033
1.39	1.2	5	12.5	541.1	135	40	0	1	150	0.55121			1.5	5	5	10.4	46.7	250	10			0	1	30	18.3139
1.39	1.2	5	12.5	541.1	135	50	0	1	150	0.6418			1.5	5	5	10.4	46.7	250	10			0	1	37	18.1572
1.39	1.2	5	12.5	541.1	135	60	0	1	150	0.68326			1.5	5	5	10.4	46.7	250	10			0	1	44	24.1628
1.39	1.2	5	12.5	541.1	135	80	0	1	150	0.63909			1.5	5	5	10.4	46.7	250	10			0	1	51	10.7939
1.39	1.2	5	12.5	541.1	135	100	0	1	150	0.50209			1.5	5	5	10.4	46.7	250	10			0	1	58	26.1211
1.39	7	5	12.5	541.1	135	10	0	1	150	0.58997			1.5	0.83	5	10.4	46.7	250	20			0	1	0	21.7002
1.39	7	5	12.5	541.1	135	20	0	1	150	0.6445			1.5	0.83	5	10.4	46.7	250	20			0	1	7	6.6863
1.39	7	5	12.5	541.1	135	30	0	1	150	0.50705			1.5	0.83	5	10.4	46.7	250	20			0	1	15	7.6002
1.39	7	5	12.5	541.1	135	40	0	1	150	0.5769			1.5	0.83	5	10.4	46.7	250	20			0	1	23	7.7307
1.39	7	5	12.5	541.1	135	50	0	1	150	0.67019			1.5	0.83	5	10.4	46.7	250	20			0	1	30	7.7307
1.39	7	5	12.5	541.1	135	60	0	1	150	0.72742			1.5	0.83	5	10.4	46.7	250	20			0	1	37	7.8874
1.39	7	5	12.5	541.1	135	80	0	1	150	0.79457			1.5	0.83	5	10.4	46.7	250	20			0	1	44	24.8597
1.39	7	5	12.5	541.1	135	100	0	1	150	0.8153			1.5	0.83	5	10.4	46.7	250	20			0	1	51	7.6002
1.66	1	5	22.4	39.3	555.4	50	0	1	0	2.0358			1.5	0.83	5	10.4	46.7	250	20			0	1	58	26.3741
1.66	1	5	22.4	39.3	555.4	50	0	1	7	1.7782			1.5	3	5	10.4	46.7	250	20			0	1	0	19.0108
1.66	1	5	22.4	39.3	555.4	50	0	1	30	2.12167			1.5	3	5	10.4	46.7	250	20			0	1	7	6.3991
1.66	1	5	22.4	39.3	555.4	50	0	1	60	2.1039			1.5	3	5	10.4	46.7	250	20			0	1	15	9.8457
1.66	1	5	22.4	39.3	555.4	50	0	1	90	2.47698			1.5	3	5	10.4	46.7	250	20			0	1	23	15.0941
1.66	1	5	22.4	39.3	555.4	50	0	1	120	2.44441			1.5	3	5	10.4	46.7	250	20			0	1	30	6.3991
1.66	1	5	21.2	43.1	540.23	50	0	2	0	2.07576			1.5	3	5	10.4	46.7	250	20			0	1	37	8.488
1.66	1	5	21.2	43.1	540.23	50	0	2	7	2.1263			1.5	3	5	10.4	46.7	250	20			0	1	44	19.8985
1.66	1	5	21.2	43.1	540.23	50	0	2	30	2.67331			1.5	3	5	10.4	46.7	250	20			0	1	51	6.2424
1.66	1	5	21.2	43.1	540.23	50	0	2	60	2.16197			1.5	3	5	10.4	46.7	250	20			0	1	58	18.5669
1.66	1	5	21.2	43.1	540.23	50	0	2	90	2.14413			1.5	5	5	10.4	46.7	250	20			0	1	0	16.6085
1.66	1	5	21.2	43.1	540.23	50	0	2	120	2.77736			1.5	5	5	10.4	46.7	250	20			0	1	7	18.4102
1.66	1	5	8	43.1	390	20	0	10	180	0.229			1.5	5	5	10.4	46.7	250	20			0	1	15	17.653
1.66	1	5	8	43.1	390	40	0	10	180	0.233			1.5	5	5	10.4	46.7	250	20			0	1	23	24.1025
1.66	1	5	8	43.1	390	60	0	10	180	0.296			1.5	5	5	10.4	46.7	250	20			0	1	30	15.2508
1.66	1	5	8	43.1	390	80	0	10	180	0.33			1.5	5	5	10.4	46.7	250	20			0	1	37	19.0108
1.66	1	5	8	43.1	390	100	0	10	180	0.336			1.5	5	5	10.4	46.7	250	20			0	1	44	21.8569
1.66	1	5	8	43.1	390	20	0	5	180	0.236			1.5	5	5	10.4	46.7	250	20			0	1	51	8.2007
1.66	1	5	8	43.1	390	40	0	5	180	0.248			1.5	5	5	10.4	46.7	250	20			0	1	58	20.3685
1.66	1	5	8	43.1	390	60	0	5	180	0.32			1.5	0.83	5	10.4	46.7	250	30			0	1	0	27.4385
1.66	1	5	8	43.1	390	80	0	5	180	0.338			1.5	0.83	5	10.4	46.7	250	30			0	1	7	7.4634
1.66	1	5	8	43.1	390	100	0	5	180	0.318			1.5	0.83	5	10.4	46.7	250	30			0	1	15	6.8629
1.66	1	5	8	43.1	390	20	0	1	180	1.405			1.5	0.83	5	10.4	46.7	250	30			0	1	23	7.7767
1.66	1	5	8	43.1	390	40	0	1	180	1.595			1.5	0.83	5	10.4	46.7	250	30			0	1	30	7.7767
1.66	1	5	8	43.1	390	60	0	1	180	1.869			1.5	0.83	5	10.4	46.7	250	30			0	1	37	8.064
1.66	1	5	8	43.1	390	80	0	1	180	1.879			1.5	0.83	5	10.4	46.7	250	30			0	1	44	24.3051
1.66	1	5	8	43.1	390	100	0	1	180	1.904			1.5	0.83	5	10.4	46.7	250	30			0	1	51	7.1762
										1.99743			1.5	0.83	5	10.4	46.7	250	30			0	1	58	21.7462
										15.6773			1.5	3	5	10.4	46.7	250	30			0	1	0	27.7518
										0.03			1.5	3	5	10.4	46.7	250	30			0	1	7	7.1762
										2.23303			1.5	3	5	10.4	46.7	250	30			0	1	15	11.0668
													1.5	3	5	10.4	46.7	250	30			0	1	23	16.7851
													1.5	3	5	10.4	46.7	250	30			0	1	30	6.8629
													1.5	3	5	10.4	46.7	250	30			0	1	37	9.2651
													1.5	3	5	10.4	46.7	250	30			0	1	44	23.104
													1.5	3	5	10.4	46.7	250	30			0	1	51	7.6201
													1.5	3	5	10.4	46.7	250	30			0	1	58	20.8323
													1.5	5	5	10.4	46.7	250	30			0	1	0	16.4718
													1.5	5	5	10.4	46.7	250	30			0	1	7	17.229
													1.5	5	5	10.4	46.7	250	30			0	1	15	14.3829
													1.5	5	5	10.4	46.7	250	30			0	1	23	19.344
													1.5	5	5	10.4	46.7	250	30			0	1	30	12.8684
													1.5	5	5	10.4	46.7	250	30			0	1	37	16.6284
													1.5	5	5	10.4	46.7	250	30			0	1	44	19.7879
													1.5	5	5	10.4	46.7	250	30			0	1	51	9.7351
													1.5	5	5	10.4	46.7	250	30			0	1	58	21.4329
													1.5	0.83	5	10.4	46.7	250	10			10	1	0	28.2786
													1.5	0.83	5	10.4	46.7	250	10			10	1	7	7.1005
													1.5	0.83	5	10.4	46.7	250	10			10	1	15	5.2173
													1.5	0.83	5	10.4	46.7	250	10			10	1	23	10.239
													1.5	0.83	5	10.4	46.7	250	10			10	1	30	10.8667
													1.5	0.83	5	10.4	46.7	250	10			10	1	37	11.6581
													1.5	0.83	5	10.4	46.7	250	10			10	1	44	26.3955
													1.5	0.83	5	10.4	46.7	250	10			10	1	51	6.1453
													1.5	0.83	5	10.4	46.7	250	10			10	1	58	23.8847
													1.5	3	5	10.4	46.7	250	10			10	1	0	29.998
													1.5	3	5	10.4	46.7	250	10			10	1	7	6.9367
													1.5	3	5	10.4	46.7	250	10			10	1	15	11.1669
													1.5	3	5	10.4	46.7	250	10			10	1	23	14.7966
													1.5	3	5	10.4	46.7	250	10			10	1	30	7.4007
													1.5	3	5	10.4	46.7	250	10			10	1	37	8.8198
													1.5	3	5	10.4	46.7	250	10			10	1	44	23.7209
													1.5	3	5	10.4	46.7	250	10			10	1	51	8.8198
													1.5	3	5	10.4	46.7	250	10			10	1	58	19.8183
													1.5	5	5	10.4	46.7	250	10			10	1	0	28.1149
													1.5	5	5	10.4	46.7	250	10			10	1	7	6.773
													1.5	5	5	10.4	46.7	250	10			10	1	15	5.845
													1.5	5	5	10.4	46.7	250	10			10	1	23	19.6545
													1.5	5	5	10.4	46.7	250	10			10	1	30	14.6329
													1.5	5	5	10.4	46.7	250	10			10	1	37	20.1185
													1.5	5	5	10.4	46.7	250	10			10	1	44	23.0932
													1.5	5	5	10.4	46.7	250	10			10	1	51	11.0304
													1.5	5	5	10.4	46.7	250	10			10	1	58	23.0932
													1.5	0.83	5	10.4	46.7	250	20			10	1	0	29.635
													1.5	0.83	5	10.4	46.7	250	20			10	1	7	7.1755
													1.5	0.83	5	10.4	46.7	250	20			10	1	15	11.0815
													1.5	0.83	5	10.4	46.7	250	20			10	1	23	9.0471
													1.5	0.83	5	10.4	46.7	250	20			10	1	30	8.1249
													1.5	0.83	5	10.4	46.7	250	20			10	1	37	10.1593
													1.5	0.83	5	10.4	46.7	250	20			10	1	44	18.8935
													1.5	0.83	5	10.4	46.7	250	20			10	1	51	7.1755
													1.5	0.83	5	10.4	46.7	250	20			10	1	58	19.653
													1.5	3	5	10.4	46.7	250	20			10	1	0	22.0129
													1.5	3	5	10.4	46.7	250	20			10	1	7	5.4666
													1.5	3	5	10.4	46.7	250	20			10	1	15	6.3889
													1.5	3	5	10.4	46.7	250	20			10	1	23	14.3636
													1.5	3	5	10.4	46.7	250	20			10	1	30	7.501
													1.5	3	5	10.4	46.7	250	20			10	1	37	5.4666
													1.5	3	5	10.4	46.7	250	20			10	1	44	22.6368
													1.5	3	5	10.4	46.7	250	20			10	1	51	5.9278
													1.5	3	5	10.4	46.7	250	20			10	1	58	18.568
													1.5	5	5	10.4	46.7	250	20			10	1	0	25.1323
													1.5	5	5	10.4	46.7	250	20			10	1	7	6.0905
													1.5	5	5	10.4	46.7	250	20			10	1	15	7.1755
													1.5	5	5	10.4	46.7	250	20			10	1	23	15.9098
													1.5	5	5	10.4	46.7	250	20			10	1	30	12.1665
													1.5	5	5	10.4	46.7	250	20			10	1	37	18.568
													1.5	5	5	10.4	46.7	250	20			10	1	44	23.0979
													1.5	5	5	10.4	46.7	250	20			10	1	51	10.1593
													1.5	5	5	10.4	46.7	250	20			10	1	58	25.1323
													1.5	0.83	5	10.4	46.7	250	30			10	1	0	24.364
													1.5	0.83	5	10.4	46.7	250	30			10	1	7	7.9818
													1.5	0.83	5	10.4	46.7	250	30			10	1	15	7.0494
													1.5	0.83	5	10.4	46.7	250	30			10	1	23	9.8198
													1.5	0.83	5	10.4	46.7	250	30			10	1	30	7.0494
													1.5	0.83	5	10.4	46.7	250	30			10	1	37	10.1128
													1.5	0.83	5	10.4	46.7	250	30			10	1	44	25.5893
													1.5	0.83	5	10.4	46.7	250	30			10	1	51	7.0494
													1.5	0.83	5	10.4	46.7	250	30			10	1	58	24.8168
													1.5	3	5	10.4	46.7	250	30			10	1	0	15.7866
													1.5	3	5	10.4	46.7	250	30			10	1	7	15.6268
													1.5	3	5	10.4	46.7	250	30			10	1	15	12.8831
													1.5	3	5	10.4	46.7	250	30			10	1	23	16.2395
													1.5	3	5	10.4	46.7	250	30			10	1	30	5.9839
													1.5	3	5	10.4	46.7	250	30			10	1	37	8.5944
													1.5	3	5	10.4	46.7	250	30			10	1	44	23.5915
													1.5	3	5	10.4	46.7	250	30			10	1	51	8.8875
													1.5	3	5	10.4	46.7	250	30			10	1	58	18.3971
													1.5	5	5	10.4	46.7	250	30			10	1	0	12.5635
													1.5	5	5	10.4	46.7	250	30			10	1	7	17.4648
													1.5	5	5	10.4	46.7	250	30			10	1	15	15.3338
													1.5	5	5	10.4	46.7	250	30			10	1	23	17.012
													1.5	5	5	10.4	46.7	250	30			10	1	30	14.881
													1.5	5	5	10.4	46.7	250	30			10	1	37	18.2373
													1.5	5	5	10.4	46.7	250	30			10	1	44	20.5282
													1.5	5	5	10.4	46.7	250	30			10	1	51	10.1128
													1.5	5	5	10.4	46.7	250	30			10	1	58	22.526
													1.5	0.83	5	10.4	46.7	250	10			20	1	0	29.1646
													1.5	0.83	5	10.4	46.7	250	10			20	1	7	6.7654
													1.5	0.83	5	10.4	46.7	250	10			20	1	15	6.4758
													1.5	0.83	5	10.4	46.7	250	10			20	1	23	10.1081
													1.5	0.83	5	10.4	46.7	250	10			20	1	30	6.9233
													1.5	0.83	5	10.4	46.7	250	10			20	1	37	9.9502
													1.5	0.83	5	10.4	46.7	250	10			20	1	44	24.7689
													1.5	0.83	5	10.4	46.7	250	10			20	1	51	7.9761
													1.5	0.83	5	10.4	46.7	250	10			20	1	58	21.1366
													1.5	3	5	10.4	46.7	250	10			20	1	0	23.4266
													1.5	3	5	10.4	46.7	250	10			20	1	7	7.5287
													1.5	3	5	10.4	46.7	250	10			20	1	15	8.7395
													1.5	3	5	10.4	46.7	250	10			20	1	23	15.2407
													1.5	3	5	10.4	46.7	250	10			20	1	30	11.0031
													1.5	3	5	10.4	46.7	250	10			20	1	37	7.8182
													1.5	3	5	10.4	46.7	250	10			20	1	44	26.4535
													1.5	3	5	10.4	46.7	250	10			20	1	51	9.1869
													1.5	3	5	10.4	46.7	250	10			20	1	58	21.9
													1.5	5	5	10.4	46.7	250	10			20	1	0	17.8202
													1.5	5	5	10.4	46.7	250	10			20	1	7	18.873
													1.5	5	5	10.4	46.7	250	10			20	1	15	14.1879
													1.5	5	5	10.4	46.7	250	10			20	1	23	16.0041
													1.5	5	5	10.4	46.7	250	10			20	1	30	15.0828
													1.5	5	5	10.4	46.7	250	10			20	1	37	14.3458
													1.5	5	5	10.4	46.7	250	10			20	1	44	23.7161
													1.5	5	5	10.4	46.7	250	10			20	1	51	12.8192
													1.5	5	5	10.4	46.7	250	10			20	1	58	24.7689
													1.5	0.83	5	10.4	46.7	250	20			20	1	0	28.5171
													1.5	0.83	5	10.4	46.7	250	20			20	1	7	6.7501
													1.5	0.83	5	10.4	46.7	250	20			20	1	15	5.532
													1.5	0.83	5	10.4	46.7	250	20			20	1	23	10.5633
													1.5	0.83	5	10.4	46.7	250	20			20	1	30	7.518
													1.5	0.83	5	10.4	46.7	250	20			20	1	37	21.5262
													1.5	0.83	5	10.4	46.7	250	20			20	1	44	25.0217
													1.5	0.83	5	10.4	46.7	250	20			20	1	51	16.336
													1.5	0.83	5	10.4	46.7	250	20			20	1	58	21.6851
													1.5	3	5	10.4	46.7	250	20			20	1	0	25.0217
													1.5	3	5	10.4	46.7	250	20			20	1	7	6.4323
													1.5	3	5	10.4	46.7	250	20			20	1	15	7.2003
													1.5	3	5	10.4	46.7	250	20			20	1	23	16.4949
													1.5	3	5	10.4	46.7	250	20			20	1	30	9.3452
													1.5	3	5	10.4	46.7	250	20			20	1	37	8.2595
													1.5	3	5	10.4	46.7	250	20			20	1	44	24.1213
													1.5	3	5	10.4	46.7	250	20			20	1	51	7.0414
													1.5	3	5	10.4	46.7	250	20			20	1	58	21.3673
													1.5	5	5	10.4	46.7	250	20			20	1	0	12.8406
													1.5	5	5	10.4	46.7	250	20			20	1	7	17.4217
													1.5	5	5	10.4	46.7	250	20			20	1	15	15.4357
													1.5	5	5	10.4	46.7	250	20			20	1	23	22.2942
													1.5	5	5	10.4	46.7	250	20			20	1	30	12.6817
													1.5	5	5	10.4	46.7	250	20			20	1	37	19.9904
													1.5	5	5	10.4	46.7	250	20			20	1	44	23.9624
													1.5	5	5	10.4	46.7	250	20			20	1	51	11.4636
													1.5	5	5	10.4	46.7	250	20			20	1	58	23.6447
													1.5	0.83	5	10.4	46.7	250	30			20	1	0	28.0216
													1.5	0.83	5	10.4	46.7	250	30			20	1	7	8.5729
													1.5	0.83	5	10.4	46.7	250	30			20	1	15	6.8945
													1.5	0.83	5	10.4	46.7	250	30			20	1	23	10.2514
													1.5	0.83	5	10.4	46.7	250	30			20	1	30	8.2532
													1.5	0.83	5	10.4	46.7	250	30			20	1	37	12.4094
													1.5	0.83	5	10.4	46.7	250	30			20	1	44	26.1833
													1.5	0.83	5	10.4	46.7	250	30			20	1	51	8.5729
													1.5	0.83	5	10.4	46.7	250	30			20	1	58	25.1176
													1.5	3	5	10.4	46.7	250	30			20	1	0	26.796
													1.5	3	5	10.4	46.7	250	30			20	1	7	12.8623
													1.5	3	5	10.4	46.7	250	30			20	1	15	12.2495
													1.5	3	5	10.4	46.7	250	30			20	1	23	18.8301
													1.5	3	5	10.4	46.7	250	30			20	1	30	8.12
													1.5	3	5	10.4	46.7	250	30			20	1	37	9.0258
													1.5	3	5	10.4	46.7	250	30			20	1	44	25.2775
													1.5	3	5	10.4	46.7	250	30			20	1	51	9.6386
													1.5	3	5	10.4	46.7	250	30			20	1	58	22.9862
													1.5	5	5	10.4	46.7	250	30			20	1	0	9.3455
													1.5	5	5	10.4	46.7	250	30			20	1	7	16.6987
													1.5	5	5	10.4	46.7	250	30			20	1	15	19.3096
													1.5	5	5	10.4	46.7	250	30			20	1	23	21.2812
													1.5	5	5	10.4	46.7	250	30			20	1	30	15.4732
													1.5	5	5	10.4	46.7	250	30			20	1	37	19.7626
													1.5	5	5	10.4	46.7	250	30			20	1	44	20.8282
													1.5	5	5	10.4	46.7	250	30			20	1	51	10.5711
													1.5	5	5	10.4	46.7	250	30			20	1	58	24.2118
													1.5	1	5	10.4	46.7	315	10			76	1	71	0.2
													1.5	1	5	10.4	46.7	315	20			76	1	71	0.2
													1.5	1	5	10.4	46.7	315	30			76	1	71	0.2
													1.5	1	5	10.4	46.7	315	40			76	1	71	0.2
													1.5	1	5	10.4	46.7	315	50			76	1	71	0.18
													1.5	1	5	10.4	46.7	315	60			76	1	71	0.16
													1.5	1	5	10.4	46.7	405	10			76	1	71	0.18
													1.5	1	5	10.4	46.7	405	20			76	1	71	0.18
													1.5	1	5	10.4	46.7	405	30			76	1	71	0.18
													1.5	1	5	10.4	46.7	405	40			76	1	71	0.16
													1.5	1	5	10.4	46.7	405	50			76	1	71	0.11
													1.5	1	5	10.4	46.7	405	60			76	1	71	0.07
													1.5	1	5	10.4	46.7	498	10			76	1	71	0.15
													1.5	1	5	10.4	46.7	498	20			76	1	71	0.15
													1.5	1	5	10.4	46.7	498	30			76	1	71	0.15
													1.5	1	5	10.4	46.7	498	40			76	1	71	0.15
													1.5	1	5	10.4	46.7	498	50			76	1	71	0.12
													1.5	1	5	10.4	46.7	498	60			76	1	71	0.19
													1.48	0.4	5	11.3	45.7	0	20			0	1	0	11.44
													1.48	1.98	5	11.3	45.7	0	20			0	1	0	11.14
													1.48	2.37	5	11.3	45.7	0	20			0	1	0	10.04
													1.48	2.77	5	11.3	45.7	0	20			0	1	0	10.95
													1.48	2.93	5	11.3	45.7	0	20			0	1	0	11.59
													1.48	3.56	5	11.3	45.7	0	20			0	1	0	10.89
													1.48	0.4	5	11.3	45.7	0	50			0	1	0	12.02
													1.48	1.98	5	11.3	45.7	0	50			0	1	0	11.93
													1.48	2.37	5	11.3	45.7	0	50			0	1	0	11.03
													1.48	2.77	5	11.3	45.7	0	50			0	1	0	9.88
													1.48	2.93	5	11.3	45.7	0	50			0	1	0	11.35
													1.48	3.56	5	11.3	45.7	0	50			0	1	0	10.63
													1.48	0.4	5	11.3	45.7	0	100			0	1	0	10.87
													1.48	1.98	5	11.3	45.7	0	100			0	1	0	11.94
													1.48	2.37	5	11.3	45.7	0	100			0	1	0	11.23
													1.48	2.77	5	11.3	45.7	0	100			0	1	0	8.91
													1.48	2.93	5	11.3	45.7	0	100			0	1	0	11.09
													1.48	3.56	5	11.3	45.7	0	100			0	1	0	11.28
													1.48	0.4	5	11.3	45.7	297	20			0	1	60	6.25
													1.48	1.98	5	11.3	45.7	297	20			0	1	60	6.47
													1.48	2.37	5	11.3	45.7	297	20			0	1	60	8.6
													1.48	2.77	5	11.3	45.7	297	20			0	1	60	8.49
													1.48	2.93	5	11.3	45.7	297	20			0	1	60	7.09
													1.48	3.56	5	11.3	45.7	297	20			0	1	60	9.01
													1.48	0.4	5	11.3	45.7	297	50			0	1	60	7.33
													1.48	1.98	5	11.3	45.7	297	50			0	1	60	7.43
													1.48	2.37	5	11.3	45.7	297	50			0	1	60	7.79
													1.48	2.77	5	11.3	45.7	297	50			0	1	60	8.55
													1.48	2.93	5	11.3	45.7	297	50			0	1	60	7.6
													1.48	3.56	5	11.3	45.7	297	50			0	1	60	8.65
													1.48	0.4	5	11.3	45.7	297	100			0	1	60	7.98
													1.48	1.98	5	11.3	45.7	297	100			0	1	60	7.96
													1.48	2.37	5	11.3	45.7	297	100			0	1	60	8.01
													1.48	2.77	5	11.3	45.7	297	100			0	1	60	8.2
													1.48	2.93	5	11.3	45.7	297	100			0	1	60	8.19
													1.48	3.56	5	11.3	45.7	297	100			0	1	60	8.35
																									7.17281
																									69.9168
																									0.05934
																									7.16848

## Sheet: yieldET 
																							Salinity of irrigation water g/L	SMP -kPa
																			seed yield	lint yield			0.3	5
Bulk density g/cm3	SMP -kPa	Average temperature	Total precipitation (mm)	Irrigation (mm)	depth (cm)	Forest year	conductivity mS/cm			Bulk density g/cm3	Salinity of irrigation water g/L	porosity	SMP -kPa	Average temperature	Total precipitation (mm)	Irrigation (mm)	Forest year	Fertilization kg N/ha	yield			Bulk density	0.3	5	Average temperature	Total precipitation (mm)	Irrigation (mm)	pH	Year	Fertilization kg N/ha	ET mm
1.33	5	8	67.3	666.4	20	1	7.6				0.3		5	8	114.6	637	2		3050			1.46	0.3	5	10.8	70.61	354	7.645	1		1129.43
1.43	5	8	67.3	666.4	60	1	11.6				0.3		10	8	114.6	460.6	2		3390			1.46	0.3	5	10.8	70.61	423	7.645	1		1129.43
1.47	5	8	67.3	666.4	100	1	21.2				0.3		15	8	114.6	372.4	2		4650			1.46	0.3	5	10.8	70.61	500	7.645	1		1129.43
1.47	5	8	67.3	666.4	120	1	13.5				0.3		20	8	67.3	274.4	2		2560			1.46	0.3	5	10.8	70.61	354	7.645	1		1129.43
1.25	5	8	114.6	637	20	2	6.5				0.3		25	8	114.6	245	2		2690			1.46	0.3	5	10.8	70.61	423	7.645	1		1129.43
1.32	5	8	114.6	637	60	2	7				0.3		5	8	70.4	646.8	3		4780			1.46	0.3	5	10.8	70.61	500	7.645	1		1129.43
1.53	5	8	114.6	637	100	2	10.4				0.3		10	8	70.4	548.8	3		4560			1.46	0.3	5	10.8	70.61	354	7.645	2		1111.67
1.53	5	8	114.6	637	120	2	8				0.3		15	8	70.4	372.4	3		4660			1.46	0.3	5	10.8	70.61	423	7.645	2		1111.67
1.32	5	8	70.4	646.8	20	3	4.3				0.3		20	8	70.4	274.4	3		4630			1.46	0.3	5	10.8	70.61	500	7.645	2		1111.67
1.49	5	8	70.4	646.8	60	3	7.5				0.3		25	8	114.6	245	3		4410			1.46	0.3	5	10.8	70.61	354	7.645	2		1111.67
1.51	5	8	70.4	646.8	100	3	11.1			1.42	0.3	48	5	12.8	387.603	73.5715	1	102	3876			1.46	0.3	5	10.8	70.61	423	7.645	2		1111.67
1.51	5	8	70.4	646.8	120	3	7.8			1.42	0.3	48	5	12.8	447.692	73.5715	2	102	3876			1.46	0.3	5	10.8	70.61	500	7.645	2		1111.67
1.33	10	8	67.3	460.6	20	1	8.4			1.42	0.3	48	5	12.8	480.872	75.1391	3	102	2869			1.46	0.3	5	10.8	70.61	354	7.645	3		940.72
1.43	10	8	67.3	460.6	60	1	12.8			1.42	0.3	48	5	12.8	474.863	223.795	4	102	2858.3			1.46	0.3	5	10.8	70.61	423	7.645	3		940.72
1.47	10	8	67.3	460.6	100	1	24.7			1.42	0.3	48	5	12.8	479.304	223.795	5	102	3654.3			1.46	0.3	5	10.8	70.61	500	7.645	3		940.72
1.47	10	8	67.3	460.6	120	1	15.3			1.42	0.3	48	5	12.8	435.674	222.227	6	112.5	3616.4			1.46	0.3	5	10.8	70.61	354	7.645	3		940.72
1.25	10	8	114.6	460.6	20	2	11.8			1.42	0.3	48	5	12.8	528.943	73.5715	7	112.5	2919.3			1.46	0.3	5	10.8	70.61	423	7.645	3		940.72
1.32	10	8	114.6	460.6	60	2	16.2			1.42	0.3	48	5	12.8	542.267	75.1391	8	112.5	3005.9			1.46	0.3	5	10.8	70.61	500	7.645	3		940.72
1.53	10	8	114.6	460.6	100	2	29.8			1.42	0.3	48	5	12.8	333.523	69.1301	9	112.5	3677.23			1.46	0.3	5	10.8	70.61	354	7.645	4		991.81
1.53	10	8	114.6	460.6	120	2	19.3			1.42	0.3	48	5	12.8	429.665	147.246	10	112.5	3642.13			1.46	0.3	5	10.8	70.61	423	7.645	4		991.81
1.32	10	8	70.4	548.8	20	3	12			1.42	0.3		5	8	70.8	611.7	1	72	3970			1.46	0.3	5	10.8	70.61	500	7.645	4		991.81
1.49	10	8	70.4	548.8	60	3	22.7			1.45	0.3		5	8	70.8	531.7	1	72	4220			1.46	0.3	5	10.8	70.61	354	7.645	4		991.81
1.51	10	8	70.4	548.8	100	3	27.2			1.43	0.3		5	8	70.8	477.1	1	72	1910			1.46	0.3	5	10.8	70.61	423	7.645	4		991.81
1.51	10	8	70.4	548.8	120	3	20.9			1.52	0.3		5	8	70.8	462.8	1	72	2230			1.46	0.3	5	10.8	70.61	500	7.645	4		991.81
1.33	15	8	67.3	294	20	1	21			1.51	0.3		5	8	70.8	456.4	1	72	2590			1.55	0.3	5	25.9	60.1	457.5	7.48	1	467.94	580.8
1.43	15	8	67.3	294	60	1	38.4			1.42	0.3		5	8	81.2	611.7	2	72	4780			1.68	0.3	5	29.4	60.1	457.5		1	467.94	582.5
1.47	15	8	67.3	294	100	1	34.8			1.45	0.3		5	8	81.2	531.7	2	72	5000			1.55	0.3	5	26.2	23.3	495		1	467.94	572.8
1.47	15	8	67.3	294	120	1	31.4			1.43	0.3		5	8	81.2	477.1	2	72	4900			1.68	0.3	5	27.2	23.3	495		1	467.94	548.1
1.25	15	8	114.6	372.4	20	2	14.8			1.52	0.3		5	8	81.2	462.8	2	72	4810			1.33	0.3	5	8	136	450	7.48	1	0	567
1.32	15	8	114.6	372.4	60	2	28.7			1.51	0.3		5	8	81.2	456.4	2	72	4940			1.33	0.3	5	8	136	450	7.48	1	240	584
1.53	15	8	114.6	372.4	100	2	39.9			1.42	0.3		5	8	114.6	611.7	3	72	5610			1.33	0.3	5	8	136	450	7.48	1	360	609
1.53	15	8	114.6	372.4	120	2	27.8			1.45	0.3		5	8	114.6	531.7	3	72	5830			1.33	0.3	5	8	136	450	7.48	1	480	613
1.32	15	8	70.4	372.4	20	3	20.1			1.43	0.3		5	8	114.6	477.1	3	72	5250			1.33	0.3	5	8	82	510	7.48	2	0	574
1.49	15	8	70.4	372.4	60	3	25.3			1.52	0.3		5	8	114.6	462.8	3	72	5330			1.33	0.3	5	8	82	510	7.48	2	240	593
1.51	15	8	70.4	372.4	100	3	27.1			1.51	0.3		5	8	114.6	456.4	3	72	5180			1.33	0.3	5	8	82	510	7.48	2	360	617
1.51	15	8	70.4	372.4	120	3	24			1.32	0.3	47.92	5	12.8	40	526.76	1	112.5	3293.37			1.33	0.3	5	8	82	510	7.48	2	480	636
1.33	20	8	67.3	274.4	20	1	23			1.32	0.3	47.92	5	12.8	60	514.69	2	112.5	4562.87			1.48	0.3	5	8	92	307.857		1	300	450.6
1.43	20	8	67.3	274.4	60	1	42.3			1.32	0.3	47.92	5	12.8	80	394.64	3	112.5	3923.06			1.48	0.3	5	8	92	387.453		1	300	540.9
1.47	20	8	67.3	274.4	100	1	37.8			1.45	0.3		5	7.2	166	450	1	225	6277.48			1.48	0.3	5	8	92	462.443		1	300	569.4
1.47	20	8	67.3	274.4	120	1	34.3			1.36	0.3		5	7.2	153.8	450	2	225	6212.45			1.48	0.3	5	8	92	275.608		2	300	471.9
1.25	20	8	114.6	362.6	20	2	17.5			1.46	0.3		5	7.7	213	442	1	300	7374			1.48	0.3	5	8	92	350.598		2	300	554.3
1.32	20	8	114.6	362.6	60	2	27.1			1.55	0.3		5	25.9	60.1	457.5	1	467.94	6340			1.48	0.3	5	8	92	415.35		2	300	597.9
1.53	20	8	114.6	362.6	100	2	39.8			1.68	0.3		5	29.4	60.1	457.5	1	467.94	6320			1.48	0.3	5	8	92	307.857		3	300	440.2
1.53	20	8	114.6	362.6	120	2	28.1			1.55	0.3		5	26.2	23.3	495	2	467.94	10300			1.48	0.3	5	8	92	387.453		3	300	545.2
1.32	20	8	70.4	274.4	20	3	14.1			1.68	0.3		5	27.2	23.3	495	2	467.94	9630			1.48	0.3	5	8	92	462.443		3	300	559.2
1.49	20	8	70.4	274.4	60	3	12.8			1.42	0.3		5	12.8	387.603	73.5715	1	102	3876			1.19	0.3	5	19	650	45	7.87	1	164	671
1.51	20	8	70.4	274.4	100	3	18.4			1.42	0.3		5	12.8	447.692	73.5715	2	102	3876			1.19	0.3	5	19	650	45	7.87	1	104	517
1.51	20	8	70.4	274.4	120	3	15.1			1.42	0.3		5	12.8	480.872	75.1391	3	102	2869			1.19	0.3	5	19	650	45	7.87	1	52	381
1.33	25	8	67.3	254.8	20	1	23.1			1.42	0.3		5	12.8	474.863	223.795	4	102	2858.3			1.19	0.3	5	19	650	45	7.87	1	0	272
1.43	25	8	67.3	254.8	60	1	42.3			1.42	0.3		5	12.8	479.304	223.795	5	102	3654.3			1.19	0.3	5	19	650	76	7.87	2	164	477
1.47	25	8	67.3	254.8	100	1	36.9			1.42	0.3		5	12.8	435.674	222.227	6	112.5	3616.4			1.19	0.3	5	19	650	76	7.87	2	104	425
1.47	25	8	67.3	254.8	120	1	34.1			1.42	0.3		5	12.8	528.943	73.5715	7	112.5	2919.3			1.19	0.3	5	19	650	76	7.87	2	52	376
1.25	25	8	114.6	245	20	2	19.2			1.42	0.3		5	12.8	542.267	75.1391	8	112.5	3005.9			1.19	0.3	5	19	650	76	7.87	2	0	284
1.32	25	8	114.6	245	60	2	28.3			1.42	0.3		5	12.8	333.523	69.1301	9	112.5	3677.23			1.19	0.3	5	19	650	49	7.87	3	164	587
1.53	25	8	114.6	245	100	2	36.4			1.42	0.3		5	12.8	429.665	147.246	10	112.5	3642.13			1.19	0.3	5	19	650	49	7.87	3	104	509
1.53	25	8	114.6	245	120	2	28			1.32	0.3		5	12.8	40	526.76	1	112.5	3293.37			1.19	0.3	5	19	650	49	7.87	3	52	398
1.32	25	8	70.4	235.2	20	3	16.1			1.32	0.3		5	12.8	60	514.69	2	112.5	4562.87			1.19	0.3	5	19	650	49	7.87	3	0	286
1.49	25	8	70.4	235.2	60	3	24.6			1.32	0.3		5	12.8	80	394.64	3	112.5	3923.06			1.19	0.3	5	19	650	103	7.87	4	164	601
1.51	25	8	70.4	235.2	100	3	30.5			1.45	0.3		5	7.2	166	450	1	225	6277.48			1.19	0.3	5	19	650	103	7.87	4	104	531
1.51	25	8	70.4	235.2	120	3	24.1			1.33	0.3		5	8	136	450	1	0	4587.33			1.19	0.3	5	19	650	103	7.87	4	52	441
1.33	5	8	105	705.6	40	1	8.34099			1.33	0.3		5	8	136	450	1	240	5582.65			1.19	0.3	5	19	650	103	7.87	4	0	307
1.33	10	8	105	499.8	40	1	8.70739			1.33	0.3		5	8	136	450	1	360	6467.37			1.36	0.3	5	19	56	983	7.3	1	160	1028
1.33	15	8	105	333.2	40	1	24.4934			1.33	0.3		5	8	136	450	1	480	6852.03			1.36	0.3	5	19	56	845	7.3	1	160	880
1.33	20	8	105	313.6	40	1	28.3712			1.33	0.3		5	8	82	510	2	0	4755.62			1.36	0.3	5	19	56	676	7.3	1	160	735
1.33	25	8	105	294	40	1	28.707			1.33	0.3		5	8	82	510	2	240	5635.54			1.36	0.3	5	19	56	507	7.3	1	160	585
1.45	5	8	105	705.6	80	1	11.8524			1.33	0.3		5	8	82	510	2	360	6688.55			1.36	0.3	5	19	11	1032	7.3	2	160	1074
1.45	10	8	105	499.8	80	1	13.2569			1.33	0.3		5	8	82	510	2	480	6991.47			1.36	0.3	5	19	11	893.333	7.3	2	160	922
1.45	15	8	105	333.2	80	1	39.2412			1.47	0.3		5	7	210.6	375	1	480	7040			1.36	0.3	5	19	11	714.667	7.3	2	160	764
1.45	20	8	105	313.6	80	1	38.3863			1.47	0.3		5	7	210.6	375	1	360	6930			1.36	0.3	5	19	11	536	7.3	2	160	614
1.45	25	8	105	294	80	1	40.3099			1.47	0.3		5	7	210.6	375	1	225	6760			1.36	0.3	5	18	508.5	426.5	8.4	1	56	487.3
1.56	5	8	105	705.6	120	1	22.0942			1.57	0.3		5	7	210.6	400	1	444	7720			1.36	0.3	5	18	508.5	426.5	8.4	1	75	498.1
1.56	10	8	105	499.8	120	1	26.6761			1.57	0.3		5	7	210.6	400	2	444	6810			1.36	0.3	5	18	508.5	426.5	8.4	1	94	510.6
1.56	15	8	105	333.2	120	1	37.2852			1.57	0.3		5	7	215	824.37	1	374	5490.44			1.36	0.3	5	18	506.1	459	8.4	2	56	459.4
1.56	20	8	105	313.6	120	1	41.0061			1.57	0.3		5	7	151.4	762.66	2	374	5284.62			1.36	0.3	5	18	506.1	459	8.4	2	75	473.1
1.56	25	8	105	294	120	1	38.3615			1.57	0.3		5	7	168.3	733.94	3	374	5477.84			1.36	0.3	5	18	506.1	459	8.4	2	94	484.4
1.33	5	8	105	676.2	40	2	8.00512			1.57	0.3		5	7	219.6	750.93	4	374	5622.75			1.36	0.3	5	18	508.5	426.5	8.4	1	56	516.5
1.33	10	8	105	499.8	40	2	8.34099			1.57	0.3		5	7	204.6	713.06	5	374	5454.74			1.36	0.3	5	18	508.5	426.5	8.4	1	75	545.4
1.33	15	8	105	411.6	40	2	18.1729			1.57	0.3		5	7	225.7	779.28	6	374	5248.92			1.36	0.3	5	18	508.5	426.5	8.4	1	94	547.3
1.33	20	8	105	401.8	40	2	24.4934			1.44	0.3		5	10.9	34.1	369.74	1	310.5	5411.6			1.36	0.3	5	18	506.1	459	8.4	2	56	493.1
1.33	25	8	105	284.2	40	2	25.1957			1.44	0.3		5	10.9	34.1	322.54	1	310.5	4852.5			1.36	0.3	5	18	506.1	459	8.4	2	75	511
1.45	5	8	105	667.2	80	2	10.9669			1.44	0.3		5	10.9	34.1	298.21	1	310.5	4961.6			1.36	0.3	5	18	506.1	459	8.4	2	94	516.6
1.45	10	8	105	581	80	2	14.1424			1.44	0.3		5	10.9	34.1	298.13	1	310.5	4074.5			1.36	0.3	5	18	508.5	426.5	8.4	1	56	544.5
1.45	15	8	105	402.6	80	2	29.0735			1.44	0.3		5	10.9	34.1	338.23	1	310.5	4971.5			1.36	0.3	5	18	508.5	426.5	8.4	1	75	555
1.45	20	8	105	314.4	80	2	34.3253			1.44	0.3		5	10.9	34.1	322.05	1	310.5	4905.2			1.36	0.3	5	18	508.5	426.5	8.4	1	94	567.9
1.45	25	8	105	275.2	80	2	38.3863			1.44	0.3		5	10.9	34.1	321.99	1	310.5	4825.3			1.36	0.3	5	18	506.1	459	8.4	2	56	522.5
1.56	5	8	105	667.2	120	2	12.8996			1.44	0.3		5	10.9	34.1	309.526	1	450	6760			1.36	0.3	5	18	506.1	459	8.4	2	75	533.4
1.56	10	8	105	581	120	2	28.7979			1.44	0.3		5	10.9	34.1	305.804	1	360	6980			1.36	0.3	5	18	506.1	459	8.4	2	94	545.4
1.56	15	8	105	402.6	120	2	39.7761			1.44	0.3		5	10.9	34.1	302.082	1	240	6130			1.36	0.3	5	18.5	1168.7	423	8	1	94	579
1.56	20	8	105	314.4	120	2	39.9606			1.44	0.3		5	10.9	34.1	298.36	1	150	6220			1.36	0.3	5	18.5	1168.7	349	8	1	94	507
1.56	25	8	105	275.2	120	2	40.1143			1.44	0.3		5	10.9	34.1	294.639	1	126	5130			1.36	0.3	5	18.5	1168.7	275	8	1	94	449
1.33	5	8	105	676.2	40	3	4.8296			1.42	0.3		10	17.7875	70.8	523	1	98.15	4000			1.36	0.3	5	18.5	1168.7	201	8	1	94	410
1.33	10	8	105	499.8	40	3	7.82191			1.42	0.3		20	17.7875	70.8	491.5	1	96.575	4000			1.36	0.3	5	18.5	1053.2	467	8	2	94	652
1.33	15	8	105	411.6	40	3	14.6615			1.42	0.3		30	17.7875	70.8	481	1	96.05	4100			1.36	0.3	5	18.5	1053.2	395	8	2	94	629
1.33	20	8	105	401.8	40	3	19.5774			1.42	0.3		40	17.7875	70.8	428.5	1	93.425	2700			1.36	0.3	5	18.5	1053.2	324	8	2	94	600
1.33	25	8	105	284.2	40	3	20.7988			1.42	0.3		50	17.7875	70.8	418	1	92.9	3000			1.36	0.3	5	18.5	1053.2	252	8	2	94	549
1.45	5	8	105	667.2	80	3	9.22647			1.42	0.3		10	16.4	81.2	723.8	2	108.19	5400			1.35	0.3	5	18.5	351	85	8	1	200	702
1.45	10	8	105	581	80	3	17.6538			1.42	0.3		20	16.4	81.2	601.6	2	102.08	5800			1.35	0.3	5	18.5	351	85	8	2	200	706
1.45	15	8	105	402.6	80	3	23.0888			1.42	0.3		30	16.4	81.2	592.2	2	101.61	5200			1.35	0.3	5	18.5	351	85	8	3	200	627
1.45	20	8	105	314.4	80	3	29.7757			1.42	0.3		40	16.4	81.2	517	2	97.85	5000			1.35	0.3	5	18.5	351	34	8	1	200	474
1.45	25	8	105	275.2	80	3	27.4857			1.42	0.3		50	16.4	81.2	507.6	2	97.38	5100			1.35	0.3	5	18.5	351	51	8	2	200	616
1.56	5	8	105	667.2	120	3	13.7606			1.42	0.3		10	19.1857	114.6	647	3	104.35	5900			1.35	0.3	5	18.5	351	68	8	3	200	749
1.56	10	8	105	581	120	3	27.5679			1.42	0.3		20	19.1857	114.6	597.8	3	101.89	6400			1.35	0.3	5	18.5	351	85	8	1	100	674
1.56	15	8	105	402.6	120	3	33.0416			1.42	0.3		30	19.1857	114.6	450.8	3	94.54	5600			1.35	0.3	5	18.5	351	85	8	2	150	680
1.56	20	8	105	314.4	120	3	41.7134			1.42	0.3		40	19.1857	114.6	443	3	94.15	5200			1.35	0.3	5	18.5	351	85	8	3	200	681
1.56	25	8	105	275.2	120	3	34.4561			1.42	0.3		50	19.1857	114.6	411.6	3	92.58	5200			1.16	0.3	5	18	120	614		1	120	652
										1.58	0.3		5	11	18.6	219.2	1	100.832	5456.82			1.16	0.3	5	18	120	509		1	120	556
										1.58	0.3		5	11	18.6	281.3	1	129.398	5905.29			1.16	0.3	5	18	120	405		1	120	463
										1.58	0.3		5	11	18.6	343.3	1	157.918	6109.53			1.16	0.3	5	17.9	120	639		2	120	671
										1.58	0.3		5	11	18.6	405.4	1	186.484	6099			1.16	0.3	5	17.9	120	525		2	120	576
										1.58	0.3		5	11	22.8	196.18	2	90.2428	5008.35			1.16	0.3	5	17.9	120	411		2	120	466
										1.58	0.3		5	11	22.8	256.6	2	118.036	5602.1			1.6	0.3	5	18	28	812		1	175	961
										1.58	0.3		5	11	22.8	317	2	145.82	5818.97			1.6	0.3	5	18	28	579		1	175	742
										1.58	0.3		5	11	22.8	377.4	2	173.604	5844.23			1.6	0.3	5	18	50	851		2	172	1039
										1.57	0.3		5	11	135.4	376.158	1	300	7233.2			1.6	0.3	5	18	50	603		2	172	825
										1.57	0.3		5	11	135.4	330.218	1	300	7146.5			1.6	0.3	5	18	71	816		3	224	1008
										1.57	0.3		5	11	135.4	252.156	1	300	6577.6			1.6	0.3	5	18	71	575		3	224	793
										1.57	0.3		5	11	135.4	223.549	1	300	6127.4			1.6	0.3	5	18	358	264.8		1	45	623
										1.57	0.3		5	11	135.4	199.185	1	300	5988.4			1.6	0.3	5	18	294	546.1		2	67	647
										1.48	0.3		5	8	92	307.857	1	300		1727.59		1.6	0.3	5	18	383	376.8		3	67	599
										1.48	0.3		5	8	92	387.453	1	300		2320.52		1.6	0.3	5	18	195.6	218.4		1	90	599.4
										1.48	0.3		5	8	92	462.443	1	300		2354.64		1.6	0.3	5	18	195.6	268.7		1	90	558.8
										1.48	0.3		5	8	92	275.608	2	300		1692.62		1.6	0.3	5	18	195.6	259.1		1	90	609.6
										1.48	0.3		5	8	92	350.598	2	300		2404.12		1.6	0.3	5	18	195.6	266.7		1	90	551.2
										1.48	0.3		5	8	92	415.35	2	300		2511.62		1.6	0.3	5	18	195.6	266.7		1	90	561.3
										1.48	0.3		5	8	92	307.857	3	300		1710.11		1.6	0.3	5	18	195.6	291.9		1	90	591.8
										1.48	0.3		5	8	92	387.453	3	300		2362.32		1.3	0.3	5	11	0	386		1	90	397.57
										1.48	0.3		5	8	92	462.443	3	300		2433.13		1.3	0.3	5	11	0	321		1	90	342.03
										1.43	0.3		5	8.4	108.89	486.5	1	456.94	2385.34			1.3	0.3	5	11	0	386		1	90	403.85
										1.54	0.3		5	8.4	108.89	486.5	1	456.94	2430.59			1.3	0.3	5	11	0	386		1	90	398.63
										1.65	0.3		5	8.4	108.89	486.5	1	456.94	2283.05			1.3	0.3	5	11	0	321		1	90	344.94
										1.43	0.3		5	8.4	108.89	486.5	2	456.94	3018.76			1.3	0.3	5	11	0	386		1	90	387.15
										1.54	0.3		5	8.4	108.89	486.5	2	456.94	3244.98			1.3	0.3	5	11	0	386		1	90	362.27
										1.65	0.3		5	8.4	108.89	486.5	2	456.94	2883.03			1.3	0.3	5	11	0	321		1	90	327.63
										1.43	0.3		5	8.4	108.89	486.5	3	456.94	3268.59			1.68	0.3	5	11	50	533.5		1	300	561.6
										1.54	0.3		5	8.4	108.89	486.5	3	456.94	3823.32			1.68	0.3	5	11	50	976.2		2	300	581.2
										1.65	0.3		5	8.4	108.89	486.5	3	456.94	3199.74			1.68	0.3	5	11	50	914.7		3	300	586.5
										1.43	0.3		5	8.4	108.89	486.5	4	456.94	5157.04			1.68	0.3	5	11	50	561.7		4	300	491.5
										1.54	0.3		5	8.4	108.89	486.5	4	456.94	5349.82			1.68	0.3	5	11	50	529.2		5	300	499.6
										1.65	0.3		5	8.4	108.89	486.5	4	456.94	4592.47			1.42	0.3	5	6.78301	510	587.1		2	200	796.1
										1.43	0.3		5	8.4	108.89	486.5	5	456.94	5214.08			1.42	0.3	5	6.78301	510	534.4		2	200	743.4
										1.54	0.3		5	8.4	108.89	486.5	5	456.94	5552.43			1.42	0.3	5	6.78301	510	481.7		2	200	690.7
										1.65	0.3		5	8.4	108.89	486.5	5	456.94	4647.55			1.42	0.3	5	6.78301	510	429		2	200	638
										1.43	0.3		5	8.4	108.89	486.5	6	456.94	5292.77			1.42	0.3	5	6.78301	510	376.3		2	200	585.3
										1.54	0.3		5	8.4	108.89	486.5	6	456.94	5790.45			1.42	0.3	5	6.78301	510	323.6		2	200	532.6
										1.65	0.3		5	8.4	108.89	486.5	6	456.94	4716.4			1.3	0.3	5	19.5	208.2	524.97		1	426	767.1
										1.43	0.3		5	8.4	108.89	486.5	7	456.94	5518.99			1.3	0.3	5	19.5	208.2	525		1	426	775.3
										1.54	0.3		5	8.4	108.89	486.5	7	456.94	6435.67			1.3	0.3	5	18.6	166	525		2	426	795.6
										1.65	0.3		5	8.4	108.89	486.5	7	456.94	4863.93			1.3	0.3	5	18.6	166	525		2	426	750.1
										1.43	0.3		5	8.4	108.89	486.5	8	456.94	5609.48			1.3	0.3	5	18.6	166	524.97		2	426	761.5
										1.54	0.3		5	8.4	108.89	486.5	8	456.94	6797.63			1.3	0.3	5	18.6	166	525		2	426	782.1
										1.65	0.3		5	8.4	108.89	486.5	8	456.94	4909.18			1.3	0.3	5	18.6	166	525		2	426	825
										1.43	0.3		5	8.4	108.89	486.5	9	456.94	5711.77			1.47	0.3	5	11	298.3	240		1	300	442.89
										1.54	0.3		5	8.4	108.89	486.5	9	456.94	6866.48			1.47	0.3	5	11	298.3	163		1	300	342.56
										1.65	0.3		5	8.4	108.89	486.5	9	456.94	4909.18			1.47	0.3	5	11	298.3	175		1	300	360.74
										1.43	0.3		5	8.4	108.89	486.5	10	456.94	5869.14			1.47	0.3	5	11	298.3	187		1	300	369.19
										1.54	0.3		5	8.4	108.89	486.5	10	456.94	7035.65			1.47	0.3	5	11	298.3	209		1	300	388.92
										1.65	0.3		5	8.4	108.89	486.5	10	456.94	5361.62			1.47	0.3	5	11	298.3	221		1	300	399.86
										1.43	0.3		5	8.4	108.89	486.5	11	456.94	6118.97			1.47	0.3	5	11	298.3	232		1	300	415.9
										1.54	0.3		5	8.4	108.89	486.5	11	456.94	7183.19			1.67	0.3	5	7	340	535		1	460	652
										1.65	0.3		5	8.4	108.89	486.5	11	456.94	5542.59			1.67	0.3	5	7	340	489		1	460	644
										1.51	0.3		5	12.8	453.547	32.6021	1	102	3898.8			1.67	0.3	5	7	340	373		1	460	541
										1.51	0.3		5	12.8	480.268	34.732	2	102	2922.7			1.67	0.3	5	7	340	323		1	460	469
										1.51	0.3		5	12.8	480.268	151.683	3	102	2860.4			1.67	0.3	5	7	340	256		1	460	390
										1.51	0.3		5	12.8	481.236	152.844	4	102	3610.7			1.67	0.3	5	7	205	461		2	460	689
										1.51	0.3		5	12.8	436.702	147.229	5	112.5	3469.5			1.67	0.3	5	7	205	422		2	460	668
										1.51	0.3		5	12.8	538.162	69.3912	6	112.5	2844.3			1.67	0.3	5	7	205	345		2	460	566
										1.51	0.3		5	12.8	549.199	73.8446	7	112.5	3436.2			1.67	0.3	5	7	205	268		2	460	465
										1.51	0.3		5	10	198	385	1	278.4	5745			1.67	0.3	5	7	205	217		2	460	393
										1.51	0.3		5	11.3	45.7	409.773	1	195	3103.58			1.51	0.3	5	9.99726	62	291		1	150	292
										1.51	0.3		5	11.3	45.7	409.773	1	255	3665.37			1.51	0.3	5	9.99726	62	291		1	200	288
										1.51	0.3		5	11.3	45.7	409.773	1	315	2649.83			1.51	0.3	5	9.99726	62	291		1	250	284
										1.51	0.3		5	11.3	45.7	330.643	1	195	3478.1			1.51	0.3	5	9.99726	62	291		1	300	279
										1.51	0.3		5	11.3	45.7	330.643	1	155	3766.2			1.51	0.3	5	9.99726	62	291		1	350	277
										1.51	0.3		5	11.3	45.7	330.643	1	315	3582.54			1.51	0.3	5	9.99726	62	368		1	150	349
										1.51	0.3		5	11.3	45.7	253.114	1	195	3665.37			1.51	0.3	5	9.99726	62	368		1	200	340
										1.51	0.3		5	11.3	45.7	253.114	1	255	4327.98			1.51	0.3	5	9.99726	62	368		1	250	336
										1.51	0.3		5	11.3	45.7	253.114	1	315	4079.5			1.51	0.3	5	9.99726	62	368		1	300	338
										1.51	0.3		5	11.3	45.7	473.721	2	195	3029.48			1.51	0.3	5	9.99726	62	368		1	350	344
										1.51	0.3		5	11.3	45.7	394.591	2	255	3029.48			1.51	0.3	5	9.99726	62	445		1	150	407
										1.51	0.3		5	11.3	45.7	318.985	2	315	3029.48			1.51	0.3	5	9.99726	62	445		1	200	411
										1.51	0.3		5	11.3	45.7	473.721	2	195	3256.35			1.51	0.3	5	9.99726	62	445		1	250	394
										1.51	0.3		5	11.3	45.7	394.591	2	255	3256.35			1.51	0.3	5	9.99726	62	445		1	300	401
										1.51	0.3		5	11.3	45.7	318.985	2	315	4084.63			1.51	0.3	5	9.99726	62	445		1	350	419
										1.51	0.3		5	11.3	45.7	473.721	2	195	3422.01			1.51	0.3	5	9.99726	123	267		2	150	333
										1.51	0.3		5	11.3	45.7	394.591	2	255	3566.06			1.51	0.3	5	9.99726	123	267		2	200	337
										1.51	0.3		5	11.3	45.7	318.985	2	315	3980.19			1.51	0.3	5	9.99726	123	267		2	250	318
										1.38	0.3		5	15.16	80.15	480	1	217.35		2727.25		1.51	0.3	5	9.99726	123	267		2	300	325
										1.38	0.3		5	15.16	80.15	480	2	217.35		2768.15		1.51	0.3	5	9.99726	123	267		2	350	316
										1.19	0.3		1.5	19	650	45	1	164		3126		1.51	0.3	5	9.99726	123	329		2	150	380
										1.19	0.3		1.7	19	650	45	1	104		3495		1.51	0.3	5	9.99726	123	329		2	200	373
										1.19	0.3		2	19	650	45	1	52		3341		1.51	0.3	5	9.99726	123	329		2	250	368
										1.19	0.3		5	19	650	45	1	0		1489		1.51	0.3	5	9.99726	123	329		2	300	368
										1.19	0.3		1.5	19	650	76	2	164		3899		1.51	0.3	5	9.99726	123	329		2	350	377
										1.19	0.3		1.7	19	650	76	2	104		3379		1.51	0.3	5	9.99726	123	392		2	150	434
										1.19	0.3		2	19	650	76	2	52		2623		1.51	0.3	5	9.99726	123	392		2	200	438
										1.19	0.3		5	19	650	76	2	0		1571		1.51	0.3	5	9.99726	123	392		2	250	408
										1.19	0.3		1.5	19	650	49	3	164		2822		1.51	0.3	5	9.99726	123	392		2	300	429
										1.19	0.3		1.7	19	650	49	3	104		2579		1.51	0.3	5	9.99726	123	392		2	350	429
										1.19	0.3		2	19	650	49	3	52		2167		1.48	0.3	5	10.4	46.7	465		1	346.2	592.03
										1.19	0.3		5	19	650	49	3	0		1274		1.48	0.3	5	10.4	46.7	465		2	346.2	626.63
										1.19	0.3		1.5	19	650	103	4	164		3740		1.45	0.3	5	10.4	46.7	345		1	345	636.6
										1.19	0.3		1.7	19	650	103	4	104		3280		1.45	0.3	5	10.4	46.7	465		1	345	770.4
										1.19	0.3		2	19	650	103	4	52		2300		1.45	0.3	5	10.4	46.7	585		1	345	822.3
										1.19	0.3		5	19	650	103	4	0		1140		1.33	0.35	5	11	46.7	450		1	0	374.65
										1.42	0.3		5	15.6	463	587.1	1	140		3098		1.33	0.35	5	11	46.7	450		1	240	381.86
										1.42	0.3		5	15.6	463	534.4	1	140		3028		1.33	0.35	5	11	46.7	450		1	360	397.17
										1.42	0.3		5	15.6	463	481.7	1	140		2806		1.33	0.35	5	11	46.7	450		1	480	400.17
										1.42	0.3		5	15.6	463	429	1	140		2598		1.33	4.61	5	11	46.7	450		1	0	338.69
										1.42	0.3		5	15.6	463	376.3	1	140		2306		1.33	4.61	5	11	46.7	450		1	240	343.65
										1.42	0.3		5	15.6	463	323.6	1	140		2058		1.33	4.61	5	11	46.7	450		1	360	347.19
										1.42	0.3		5	15.6	557	587.1	2	140		3237		1.33	4.61	5	11	46.7	450		1	480	359.59
										1.42	0.3		5	15.6	557	534.4	2	140		3191		1.33	8.04	5	11	46.7	450		1	0	307.49
										1.42	0.3		5	15.6	557	481.7	2	140		2939		1.33	8.04	5	11	46.7	450		1	240	325.35
										1.42	0.3		5	15.6	557	429	2	140		2642		1.33	8.04	5	11	46.7	450		1	360	336.16
										1.42	0.3		5	15.6	557	376.3	2	140		2371		1.33	8.04	5	11	46.7	450		1	480	337
										1.42	0.3		5	15.6	557	323.6	2	140		2140		1.2	0.3	5	7	210.6	777		1	300	487.14
										1.42	0.3		5	15.6	557	587.1	1	80		2169		1.59	0.3	5	11	34.1	298.93		1	300	432.55
										1.42	0.3		5	15.6	557	587.1	1	120		2520		1.59	0.3	5	11	34.1	309.85		1	300	445.95
										1.42	0.3		5	15.6	557	587.1	1	160		2855		1.59	0.3	5	11	34.1	324.57		1	300	474.57
										1.42	0.3		5	15.6	557	587.1	1	200		3051		1.59	0.3	5	11	34.1	260.95		1	300	430.17
										1.42	0.3		5	15.6	557	587.1	2	80		2328		1.59	0.3	5	11	34.1	284.67		1	300	440.71
										1.42	0.3		5	15.6	557	587.1	2	120		2618		1.59	0.3	5	11	34.1	308.38		1	300	450.61
										1.42	0.3		5	15.6	557	587.1	2	160		2987		1.59	0.3	5	11	34.1	288.81		1	300	418.51
										1.42	0.3		5	15.6	557	587.1	2	200		3080		1.59	0.3	5	11	34.1	304.17		1	300	433.72
										1.36	0.3		5	18	508.5	426.5	1	56		1831		1.59	0.3	5	11	34.1	319.52		1	300	496.6
										1.36	0.3		5	18	508.5	426.5	1	75		2174		1.59	0.3	5	11	34.1	340.12		1	300	518.18
										1.36	0.3		5	18	508.5	426.5	1	94		2100		1.3	0.3	5	6.5	304.9	360		1	300	514.3
										1.36	0.3		5	18	506.1	459	1	56		2291		1.57	0.3	5	8.1	160	216		1	204.9	434.81
										1.36	0.3		5	18	506.1	459	1	75		2641		1.57	0.3	5	8.1	160	288		1	204.9	504.3
										1.36	0.3		5	18	506.1	459	1	94		2595		1.57	0.3	5	8.1	160	360		1	204.9	544.96
										1.36	0.3		5	18	505.14	472	1	56		2253		1.3	0.3	5	7	210	333		1	128	512.7
										1.36	0.3		5	18	505.14	472	1	75		2540		1.3	0.3	5	7	210	409.5		1	236	517
										1.36	0.3		5	18	505.14	472	1	94		2550		1.3	0.3	5	7	210	615		1	133	491.5
										1.38	0.3		5	20	508.5	406.62	2	37.5		1670		1.3	0.3	5	7	210	525		1	135	484
										1.38	0.3		5	20	508.5	406.62	2	56.25		1979		1.58	0.3	5	11.3	45.7	264		1	214.5	317.69
										1.38	0.3		5	20	508.5	406.62	2	75		2256		1.58	0.3	5	11.3	45.7	330		1	214.5	370.16
										1.38	0.3		5	20	508.5	542.16	2	37.5		2117		1.58	0.3	5	11.3	45.7	396		1	214.5	419.56
										1.38	0.3		5	20	508.5	542.16	2	56.25		2428		1.58	0.3	5	11.3	45.7	560		1	214.5	522.12
										1.38	0.3		5	20	508.5	542.16	2	75		2338
										1.38	0.3		5	20	508.5	677.7	2	37.5		2085
										1.38	0.3		5	20	508.5	677.7	2	56.25		2217
										1.38	0.3		5	20	508.5	677.7	2	75		2333
										1.38	0.3		5	18	47.5	35.3	1	75		1220
										1.38	0.3		5	18	47.5	42.6	1	75		1350
										1.38	0.3		5	18	47.5	49.9	1	75		1820
										1.38	0.3		5	18	47.5	57.3	1	75		1610
										1.38	0.3		5	18	47.5	35.3	2	75		1500
										1.38	0.3		5	18	47.5	42.6	2	75		1550
										1.38	0.3		5	18	47.5	49.9	2	75		1740
										1.38	0.3		5	18	47.5	57.3	2	75		1650
										1.35	0.3		5	18.5	351	85	1	200		3846
										1.35	0.3		5	18.5	351	85	1	150		371
										1.35	0.3		5	18.5	351	85	1	100		2945
										1.35	0.3		5	18.5	351	85	2	200		4585
										1.35	0.3		5	18.5	351	85	2	150		4127
										1.35	0.3		5	18.5	351	85	2	100		3768
										1.35	0.3		5	18.5	351	85	3	200		3444
										1.35	0.3		5	18.5	351	85	3	150		2855
										1.35	0.3		5	18.5	351	85	3	100		2285
										1.35	0.3		5	18.5	351	68	1	200		3037
										1.35	0.3		5	18.5	351	68	1	150		2788
										1.35	0.3		5	18.5	351	68	1	100		2634
										1.35	0.3		5	18.5	351	68	2	200		3411
										1.35	0.3		5	18.5	351	68	2	150		3372
										1.35	0.3		5	18.5	351	68	2	100		3244
										1.35	0.3		5	18.5	351	68	3	200		2597
										1.35	0.3		5	18.5	351	68	3	150		2327
										1.35	0.3		5	18.5	351	68	3	100		2179
										1.35	0.3		5	18.5	351	51	1	200		2600
										1.35	0.3		5	18.5	351	51	1	150		2385
										1.35	0.3		5	18.5	351	51	1	100		2485
										1.35	0.3		5	18.5	351	51	2	200		2546
										1.35	0.3		5	18.5	351	51	2	150		2277.6
										1.35	0.3		5	18.5	351	51	2	100		2387
										1.35	0.3		5	18.5	351	51	3	200		1787
										1.35	0.3		5	18.5	351	51	3	150		1628
										1.35	0.3		5	18.5	351	51	3	100		1589
										1.35	0.3		5	18.5	351	34	1	200		1993
										1.35	0.3		5	18.5	351	34	1	150		1732
										1.35	0.3		5	18.5	351	34	1	100		1708
										1.35	0.3		5	18.5	351	34	2	200		1836
										1.35	0.3		5	18.5	351	34	2	150		1702
										1.35	0.3		5	18.5	351	34	2	100		1471
										1.35	0.3		5	18.5	351	34	3	200		1164
										1.35	0.3		5	18.5	351	34	3	150		1065
										1.35	0.3		5	18.5	351	34	3	100		1006
										1.2	0.3		5	18.5	81.8	493.6	1	200	5147
										1.2	0.3		5	18.5	81.8	424.9	1	200	5143
										1.2	0.3		5	18.5	81.8	350.2	1	200	4674
										1.2	0.3		5	18.5	81.8	277.6	1	200	3328
										1.2	0.3		5	18.5	198	333.7	2	200	6138
										1.2	0.3		5	18.5	198	283.9	2	200	5701
										1.2	0.3		5	18.5	198	227.1	2	200	4678
										1.2	0.3		5	18.5	198	170.7	2	200	3615
										1.16	0.3		5	18	120	614	1	120	4589
										1.16	0.3		5	18	120	509	1	120	3651
										1.16	0.3		5	18	120	405	1	120	2858
										1.16	0.3		5	17.9	120	639	2	120	4812
										1.16	0.3		5	17.9	120	525	2	120	3733
										1.16	0.3		5	17.9	120	411	2	120	2595
										1.16	0.3		5	25.5	181.2	241.8	1	120	2500
										1.16	0.3		5	25.5	181.2	278.8	1	120	3270
										1.16	0.3		5	25.5	181.2	379.8	1	120	2850
										1.16	0.3		5	25.5	181.2	550.8	1	120	3460
										1.16	0.3		5	25	113	317	2	120	2470
										1.16	0.3		5	25	113	463	2	120	2960
										1.16	0.3		5	25	113	560	2	120	2910
										1.16	0.3		5	25	113	581	2	120	2960
										1.54	0.3		5	18	210	180	2	300	5737.7
										1.54	0.3		5	18	210	240	2	300	6008.57
										1.54	0.3		5	18	210	300	2	300	6107.75
										1.54	0.3		5	18	210	360	2	300	6201.18
										1.56	0.3		5	11	18.6	240	1	300	5451.78
										1.56	0.3		5	11	18.6	320	1	300	6089.34
										1.56	0.3		5	11	18.6	400	1	300	7031.91
										1.56	0.3		5	11	20	240	2	300	5683.88
										1.56	0.3		5	11	20	320	2	300	6497.67
										1.56	0.3		5	11	20	400	2	300	7057.41
										1.33	1		5	6.6	190	372.5	1	0	4449.77
										1.33	1		5	6.6	190	372.5	1	285	5572.14
										1.49	2		5	8.3	207	480	1	300	4984.38
										1.49	3		5	8.3	207	480	1	300	5355.62
										1.49	4		5	8.3	207	480	1	300	5229.45
										1.49	5		5	8.3	207	480	1	300	4344.71
										1.49	6		5	8.3	207	480	1	300	4046.57
										1.665	0.87		5	8.6	213	385.6	2	317.25	5593.34
										1.665	2		5	8.6	213	371.6	2	317.25	5355.26
										1.665	3		5	8.6	213	364.5	2	317.25	4577.2
										1.665	4		5	8.6	213	381.8	2	317.25	4309.66
										1.665	6		5	8.6	213	405	2	317.25	2827.16
										1.665	8		5	8.6	213	405	2	317.25	1585.2
										1.665	8		5	8.6	213	847.71	2	0	1266.83
										1.665	8		5	8.6	213	847.71	3	0	2437.46
										1.665	8		5	8.6	213	847.71	4	0	3259.25
										1.665	8		5	8.6	213	847.71	5	300	5239.96
										1.665	8		5	8.6	213	847.71	6	300	5509.21
										1.665	8		5	8.6	213	847.71	7	300	5993.85
										1.665	8		5	8.6	213	847.71	8	300	7204.28
										1.665	8		5	8.6	213	847.71	9	300	7031.03
										1.665	8		5	8.6	213	847.71	10	300	7311.98
										1.665	8		5	8.6	213	847.71	11	300	7031.03
										1.665	8		5	8.6	213	847.71	12	300	6787.54
										1.665	8		5	8.6	213	847.71	13	300	7056.78
										1.665	8		5	8.6	213	847.71	14	300	6815.63
										1.665	8		5	8.6	213	847.71	15	300	6733.69
										1.33	1		5	8	200	495	1	300	6316
										1.52	0.45		5	11.3	45.7	385.6	1	195.09	8650
										1.52	0.45		5	11.3	45.7	294.8	1	195.09	9180
										1.52	0.45		5	11.3	45.7	204	1	195.09	8890
										1.52	0.45		5	11.3	45.7	391.4	1	195.09	8600
										1.52	0.45		5	11.3	45.7	299.2	1	195.09	9130
										1.52	0.45		5	11.3	45.7	206.9	1	195.09	8750
										1.39	1.2		5	12.5	541.1	135	1	120		3075.14
										1.39	7		5	12.5	541.1	135	1	120		2201.75
										1.42	1		5	11	207	675	1	100	5741.96
										1.42	1		5	11	207	675	1	200	6181.01
										1.42	1		5	11	207	675	1	300	6390.97
										1.42	1		5	11	207	675	1	400	5059.82
										1.42	3		5	11	207	675	1	100	5764.03
										1.42	3		5	11	207	675	1	200	6944.62
										1.42	3		5	11	207	675	1	300	6654.91
										1.42	3		5	11	207	675	1	400	5292.26
										1.42	5		5	11	207	675	1	100	5177.63
										1.42	5		5	11	207	675	1	200	6070.9
										1.42	5		5	11	207	675	1	300	4837.27
										1.42	5		5	11	207	675	1	400	4788.82
										1.3	5.88		5	10.7	45.7	420	1	300	6320.25
										1.3	5.88		5	10.7	45.7	460	1	300	7088.25
										1.3	5.88		5	10.7	45.7	455.7	1	300	7645.2
										1.44	0.26		5	10.7	150	285	1	268.656	3335.05
										1.44	0.26		5	10.7	150	390	1	268.656	4039.95
										1.44	0.26		5	10.7	150	495	1	268.656	3600.05
										1.44	0.575		5	10.7	58.2	480	1	400	6921.75
										1.44	0.575		5	10.7	58.2	480	1	300	6899.7
										1.44	0.575		5	10.7	58.2	480	1	200	6432.75
										1.44	2.215		5	10.7	58.2	480	1	400	6829.8
										1.44	2.215		5	10.7	58.2	480	1	300	6191.55
										1.44	2.215		5	10.7	58.2	480	1	200	5202.3
										1.44	5.565		5	10.7	58.2	480	1	400	5271.3
										1.44	5.565		5	10.7	58.2	480	1	300	4852.8
										1.44	5.565		5	10.7	58.2	480	1	200	4297.2
										1.56	1		5	6.6	189	396	1	285	5784
										1.56	1		5	6.6	189	336.6	1	285	5821
										1.56	1		5	6.6	189	277.2	1	285	4442
										1.66	1		5	21.8	39.3	547.82	2	300	3939.72
										1.75	1		5	11.48	57.5	525	1	308	4016.3
										1.59	1.75	5	5	11	34.1	378	1	300	7233.2	3484.9
										1.59	1.75		5	11	34.1	334	1	300	7146.4	3391
										1.59	1.75		5	11	34.1	253	1	300	6577.6	3148.7
										1.59	1.75		5	11	34.1	227	1	300	6127.4	2894
										1.59	1.75		5	11	34.1	201	1	300	5988.7	2869.2
										1.5	0.83		5	10.4	46.7	250	1	300	7207.8	3338.4
										1.5	3		5	10.4	46.7	250	1	300	7052.8	3267.8
										1.5	5		5	10.4	46.7	250	1	300	6596.2	3019.1
										1.45	1		5	10.4	46.7	360	1	120	5337.2
										1.45	1		5	10.4	46.7	360	2	120	4704.8
										1.37	1.75		50	11	58	345	1	300	3538
										1.37	1.75		20	11	58	435	1	300	3956
										1.37	1.75		30	11	58	405	1	300	4252
										1.37	1.75		40	11	58	375	1	300	3866
										1.37	1.75		20	11	58	480	1	300	5535
										1.37	1.75		30	11	58	420	1	300	4860
										1.37	1.75		40	11	58	375	1	300	4050
										1.37	1.75		20	11	58	585	1	300	6075
										1.37	1.75		30	11	58	465	1	300	6012
										1.37	1.75		40	11	58	375	1	300	5018
										1.48	0.4		5	11.3	45.7	297	1	300	5756
										1.48	1.98		5	11.3	45.7	297	1	300	5677
										1.48	2.37		5	11.3	45.7	297	1	300	5289
										1.48	2.77		5	11.3	45.7	297	1	300	5289
										1.48	2.93		5	11.3	45.7	297	1	300	4514
										1.48	3.56		5	11.3	45.7	297	1	300	4047
										1.48	0.4		5	11.3	45.7	297	1	300	5756
										1.48	1.98		5	11.3	45.7	297	1	300	5677
										1.48	2.37		5	11.3	45.7	297	1	300	5289
										1.48	2.77		5	11.3	45.7	297	1	300	5289
										1.48	2.93		5	11.3	45.7	297	1	300	4514
										1.48	3.56		5	11.3	45.7	297	1	300	4047
										1.45	0.3	5	5	9.99726	62	425	1	310	5857
										1.45	0.3	5	5	9.99726	62	445	1	303	5335
										1.45	0.3	5	5	9.99726	62	418	1	288	5843
										1.45	0.3	5	5	9.99726	123	392	2	281	5870
										1.45	0.3	5	5	9.99726	123	324	2	280	5468
										1.45	0.3	5	5	9.99726	123	392	2	261	5856
										1.45	0.3	5	5	9.99726	62	407	1	294	5825
										1.45	0.3	5	5	9.99726	62	412	1	278	5824
										1.45	0.3	5	5	9.99726	62	398	1	292	5789
										1.45	0.3	5	5	9.99726	123	353	2	270	5724
										1.45	0.3	5	5	9.99726	123	353	2	268	5723
										1.45	0.3	5	5	9.99726	123	347	2	275	5684
										1.51	0.3	5	5	10.2164	166.5	445	1	150	5306
										1.51	0.3	5	5	10.2164	166.5	445	1	200	5631
										1.51	0.3	5	5	10.2164	166.5	445	1	250	5846
										1.51	0.3	5	5	10.2164	166.5	445	1	300	5896
										1.51	0.3	5	5	10.2164	166.5	445	1	350	5891
										1.33	0.35	5	5	11	46.7	450	1	0	4619
										1.33	0.35	5	5	11	46.7	450	1	240	5067
										1.33	0.35	5	5	11	46.7	450	1	360	5322
										1.33	0.35	5	5	11	46.7	450	1	480	5544
										1.33	4.61	5	5	11	46.7	450	1	0	4313
										1.33	4.61	5	5	11	46.7	450	1	240	4750
										1.33	4.61	5	5	11	46.7	450	1	360	4881
										1.33	4.61	5	5	11	46.7	450	1	480	4947
										1.33	8.04	5	5	11	46.7	450	1	0	3810
										1.33	8.04	5	5	11	46.7	450	1	240	3980
										1.33	8.04	5	5	11	46.7	450	1	360	4287
										1.33	8.04	5	5	11	46.7	450	1	480	4504
										1.59	0.3	5	5	11	34.1	298.93	1	300	6478.54
										1.59	0.3	5	5	11	34.1	309.85	1	300	6766.16
										1.59	0.3	5	5	11	34.1	324.57	1	300	7435.15
										1.59	0.3	5	5	11	34.1	260.95	1	300	5206.16
										1.59	0.3	5	5	11	34.1	284.67	1	300	5777
										1.59	0.3	5	5	11	34.1	308.38	1	300	5909.65
										1.59	0.3	5	5	11	34.1	288.81	1	300	6211.94
										1.59	0.3	5	5	11	34.1	304.17	1	300	6555.15
										1.59	0.3	5	5	11	34.1	319.52	1	300	7107.54
										1.59	0.3	5	5	11	34.1	340.12	1	300	7699.09
										1.59	0.3		5	10.9	58	251.58	1	200	6600.9
										1.59	0.3		5	10.9	58	251.58	1	300	7019.2
										1.59	0.3		5	10.9	58	251.58	1	400	6823.9
										1.59	0.3		5	10.9	58	311.98	1	200	6607
										1.59	0.3		5	10.9	58	311.98	1	300	7421
										1.59	0.3		5	10.9	58	311.98	1	400	7352.1
										1.57	0.3		5	8.1	160	216	1	204.9	5493.24	2217.07
										1.57	0.3		5	8.1	160	288	1	204.9	5653.53	2380.14
										1.57	0.3		5	8.1	160	360	1	204.9	7100.84	2701.86
										1.5	0.3		5	8.1	210	340	1	360	3550
										1.5	0.3		5	8.1	210	440	2	360	4540
										1.5	0.3		5	8.1	210	540	3	360	5100
										1.5	0.3		5	8.1	210	340	1	360	3880
										1.5	0.3		5	8.1	210	440	2	360	5180
										1.5	0.3		5	8.1	210	540	3	360	5540
										1.51	0.3		5	11	50	409	1	300	3315.44
										1.51	0.3		5	11	50	529	1	300	4731.62
										1.51	0.3		5	11	50	649	1	300	5972.46
										1.51	0.3		5	11	50	769	1	300	6015.65
										1.3	0.3	5	5	7	210	333	1	128	4500
										1.3	0.3	5	5	7	210	409.5	1	236	3900
										1.3	0.3	5	5	7	210	615	1	133	4200
										1.3	0.3	5	5	7	210	525	1	135	4200
										1.58	0.3	5	5	11.3	45.7	264	1	214.5	5945.25
										1.58	0.3	5	5	11.3	45.7	330	1	214.5	6626.7
										1.58	0.3	5	5	11.3	45.7	396	1	214.5	7072.05
										1.58	0.3	5	5	11.3	45.7	560	1	214.5	7245.28
